# Supplementary material for: Enantioselective organocatalytic vinylogous aldol-cyclization cascade reaction of 3-alkylidene oxindoles witho-quinones
Source: Royal Society of Chemistry journal article supplement (doi:10.1039/d1ob00888a), 2021-01-01
Supplement: d1ob00888a1.pdf [file d1ob00888a1.pdf]

## Supporting Information

### Enantioselective organocatalytic vinylogous aldol–cyclization cascade reaction of 3-alkylidene oxindoles with *o*-quinones

Yun-Jie Tsou, Ren-You Guan and Jeng-Liang Han\*

Department of Chemistry, National Chung-Hsing University, Taichung City, Taiwan 420

[jlhan@nchu.edu.tw](mailto:jlhan@nchu.edu.tw)

#### Table of Contents:

|                                                               |            |
|---------------------------------------------------------------|------------|
| <b>1. Absolute Configuration and X-Ray Analysis Data.....</b> | <b>S2</b>  |
| <b>2. Unsuccessful substrates.....</b>                        | <b>S6</b>  |
| <b>3. Copies of NMR Spectra of Products 3, 5 and 7.....</b>   | <b>S7</b>  |
| <b>4. Copies of HPLC Spectra of Products 3, 5 and 7.....</b>  | <b>S30</b> |

## 1. Absolute Configuration and X-Ray Analysis Data

**Table 1. Crystal data and structure refinement for 5d.**

|                                   |                                                     |          |
|-----------------------------------|-----------------------------------------------------|----------|
| Identification code               | <b>5d</b>                                           |          |
| Empirical formula                 | C <sub>28</sub> H <sub>25</sub> Br N O <sub>5</sub> |          |
| Formula weight                    | 535.40                                              |          |
| Temperature                       | 150.15 K                                            |          |
| Wavelength                        | 0.71075 Å                                           |          |
| Crystal system                    | Orthorhombic                                        |          |
| Space group                       | <b>P212121</b>                                      |          |
| Unit cell dimensions              | a = 7.2170(7) Å                                     | a = 90°. |
|                                   | b = 15.0680(14) Å                                   | b = 90°. |
|                                   | c = 23.762(2) Å                                     | c = 90°. |
| Volume                            | 2584.0(4) Å <sup>3</sup>                            |          |
| Z                                 | 4                                                   |          |
| Density (calculated)              | 1.376 Mg/m <sup>3</sup>                             |          |
| Absorption coefficient            | 1.628 mm <sup>-1</sup>                              |          |
| F(000)                            | 1100                                                |          |
| Crystal size                      | 0.49 x 0.32 x 0.24 mm <sup>3</sup>                  |          |
| Theta range for data collection   | 2.905 to 26.411°.                                   |          |
| Index ranges                      | -9 ≤ h ≤ 9, -18 ≤ k ≤ 18, -29 ≤ l ≤ 29              |          |
| Reflections collected             | 40741                                               |          |
| Independent reflections           | 5270 [R(int) = 0.0539]                              |          |
| Completeness to theta = 25.243°   | 99.5 %                                              |          |
| Absorption correction             | Semi-empirical from equivalents                     |          |
| Refinement method                 | Full-matrix least-squares on F <sup>2</sup>         |          |
| Data / restraints / parameters    | 5270 / 0 / 320                                      |          |
| Goodness-of-fit on F <sup>2</sup> | 1.098                                               |          |
| Final R indices [I > 2σ(I)]       | R1 = 0.0551, wR2 = 0.1421                           |          |
| R indices (all data)              | R1 = 0.0593, wR2 = 0.1477                           |          |
| Absolute structure parameter      | 0.048(17)                                           |          |
| Extinction coefficient            | n/a                                                 |          |
| Largest diff. peak and hole       | 1.108 and -0.596 e.Å <sup>-3</sup>                  |          |

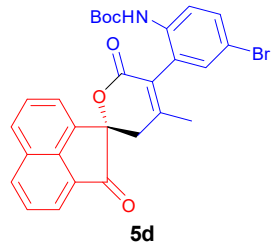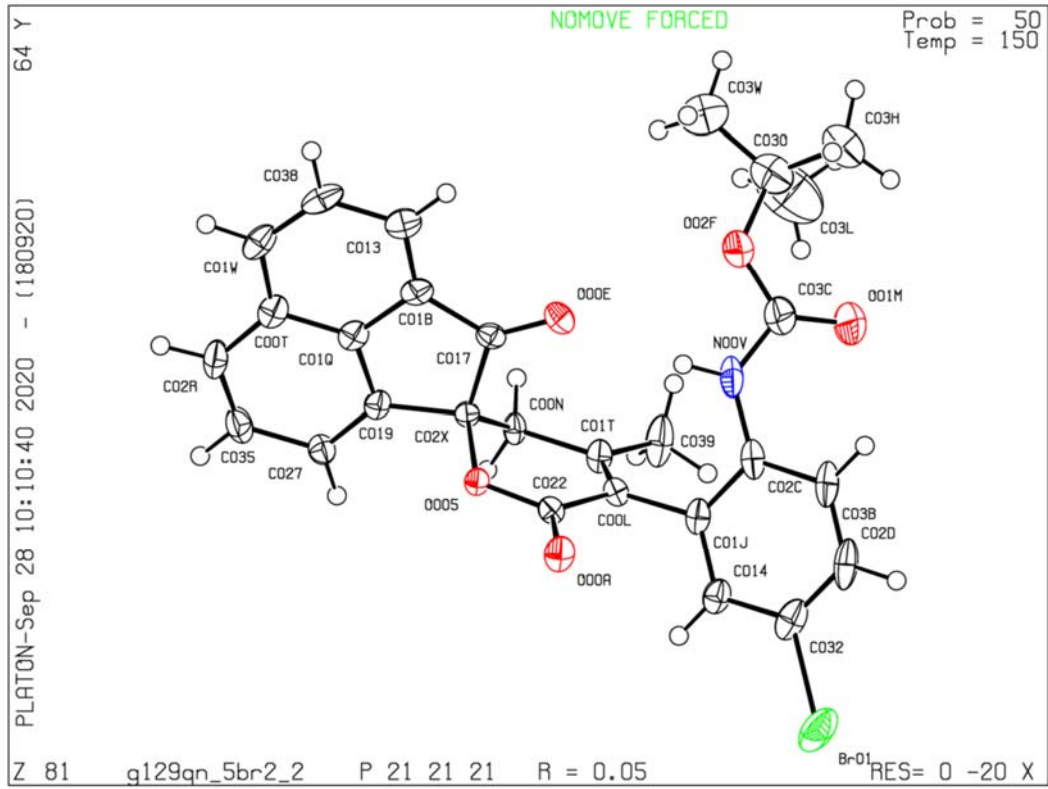

**Table 1. Crystal data and structure refinement for 7d**

|                                   |                                                     |          |
|-----------------------------------|-----------------------------------------------------|----------|
| Identification code               | <b>7d</b>                                           |          |
| Empirical formula                 | C <sub>31</sub> H <sub>24</sub> Br N O <sub>5</sub> |          |
| Formula weight                    | 570.42                                              |          |
| Temperature                       | 150.15 K                                            |          |
| Wavelength                        | 0.71075 Å                                           |          |
| Crystal system                    | Monoclinic                                          |          |
| Space group                       | I 1 2 1                                             |          |
| Unit cell dimensions              | a = 7.179(2) Å                                      | a = 90°. |
|                                   | b = 15.131(6) Å                                     | b =      |
|                                   |                                                     |          |
|                                   | c = 26.209(11) Å                                    | g = 90°. |
| Volume                            | 2843.7(18) Å <sup>3</sup>                           |          |
| Z                                 | 4                                                   |          |
| Density (calculated)              | 1.332 Mg/m <sup>3</sup>                             |          |
| Absorption coefficient            | 1.484 mm <sup>-1</sup>                              |          |
| F(000)                            | 1168                                                |          |
| Crystal size                      | 0.49 x 0.32 x 0.24 mm <sup>3</sup>                  |          |
| Theta range for data collection   | 2.909 to 26.550°.                                   |          |
| Index ranges                      | -8 ≤ h ≤ 8, -18 ≤ k ≤ 19, -32 ≤ l ≤ 32              |          |
| Reflections collected             | 22836                                               |          |
| Independent reflections           | 5867 [R(int) = 0.1031]                              |          |
| Completeness to theta = 25.243°   | 99.7 %                                              |          |
| Absorption correction             | Semi-empirical from equivalents                     |          |
| Refinement method                 | Full-matrix least-squares on F <sup>2</sup>         |          |
| Data / restraints / parameters    | 5867 / 19 / 329                                     |          |
| Goodness-of-fit on F <sup>2</sup> | 1.409                                               |          |
| Final R indices [I > 2σ(I)]       | R1 = 0.1349, wR2 = 0.3526                           |          |
| R indices (all data)              | R1 = 0.1777, wR2 = 0.3872                           |          |
| Absolute structure parameter      | 0.09(4)                                             |          |
| Extinction coefficient            | n/a                                                 |          |
| Largest diff. peak and hole       | 3.213 and -1.513 e.Å <sup>-3</sup>                  |          |

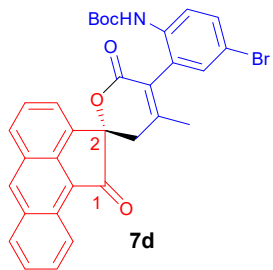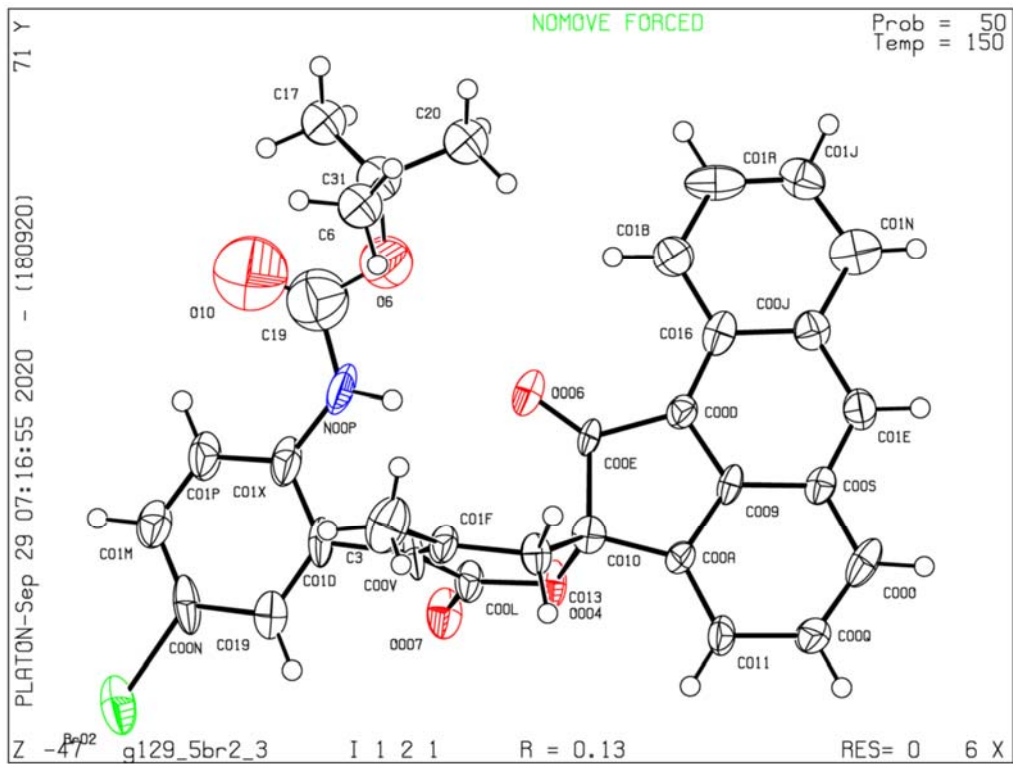

## 2. Unsuccessful substrates

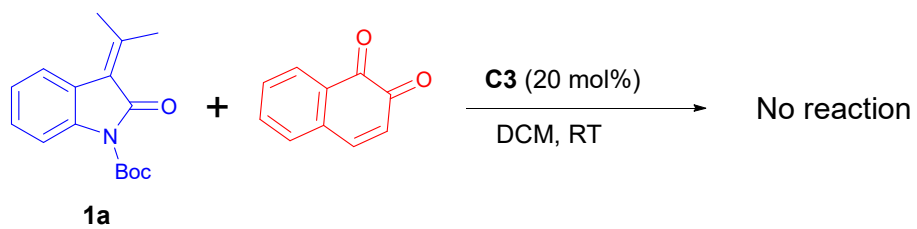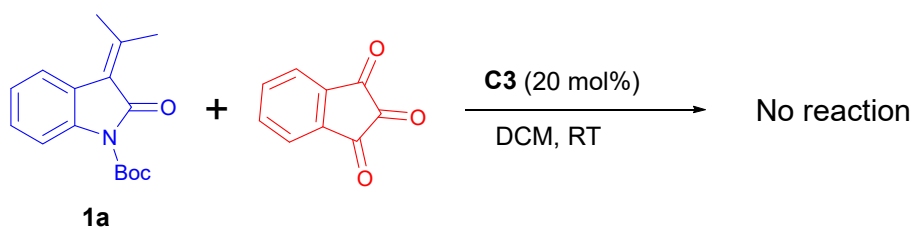

### 3. Copies of NMR Spectra of Products 3, 5 and 7

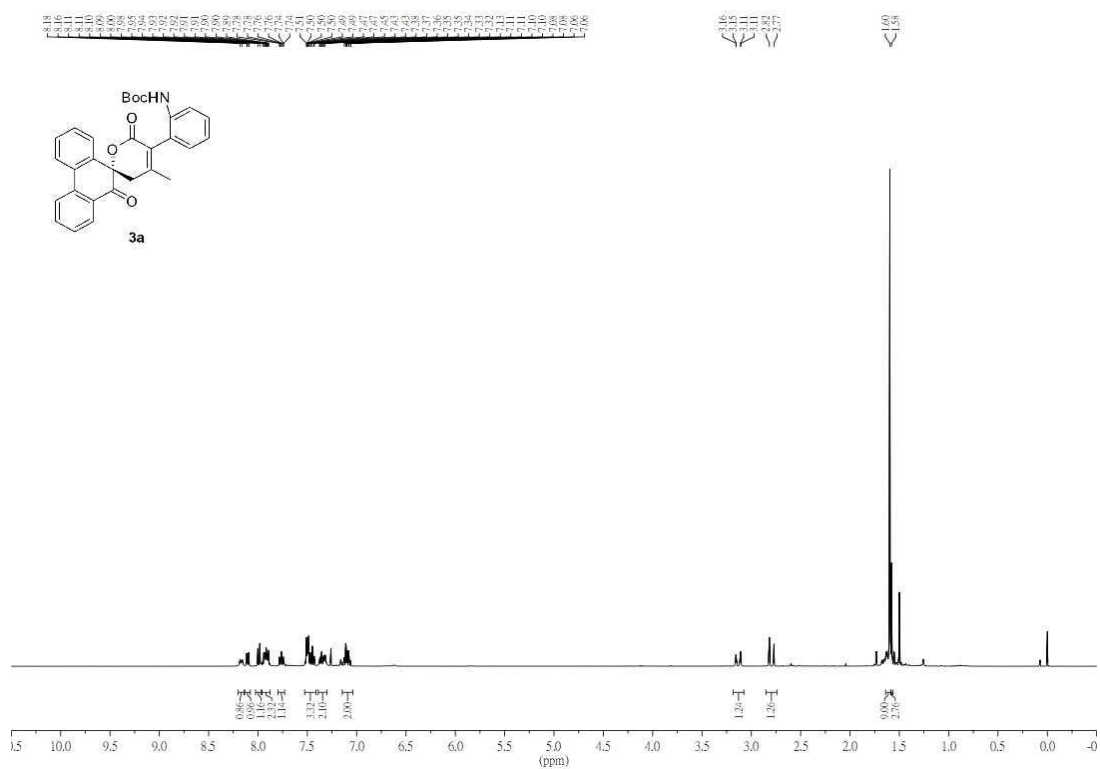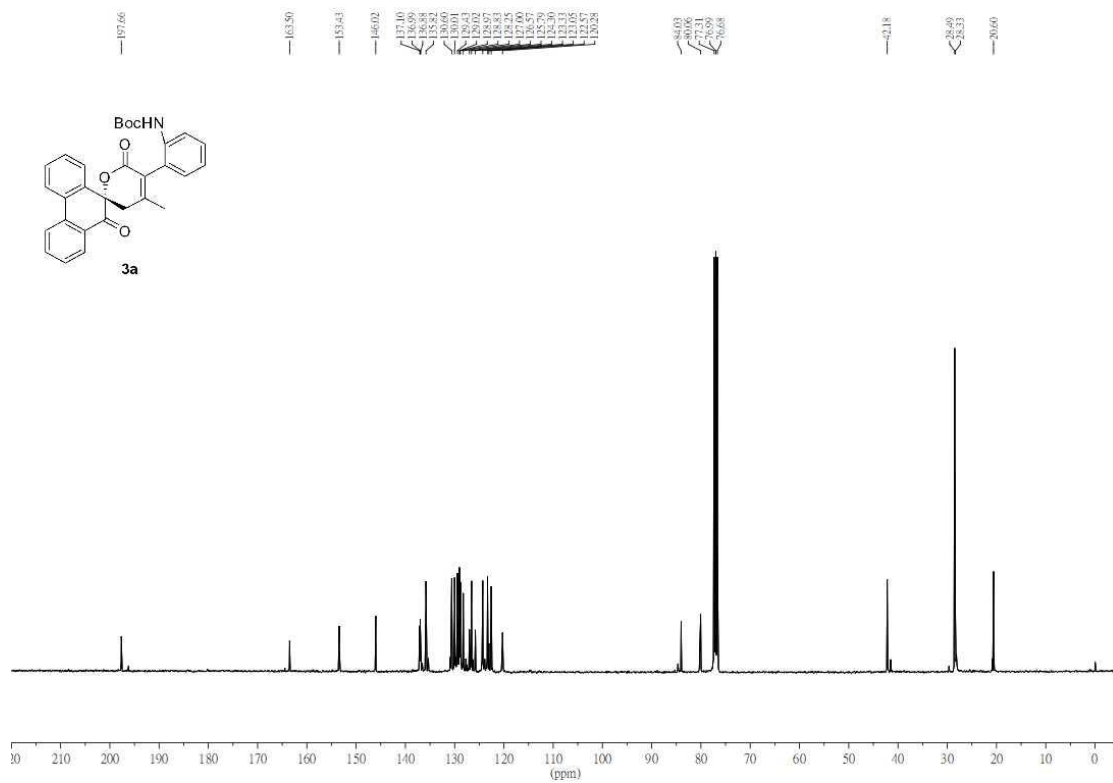

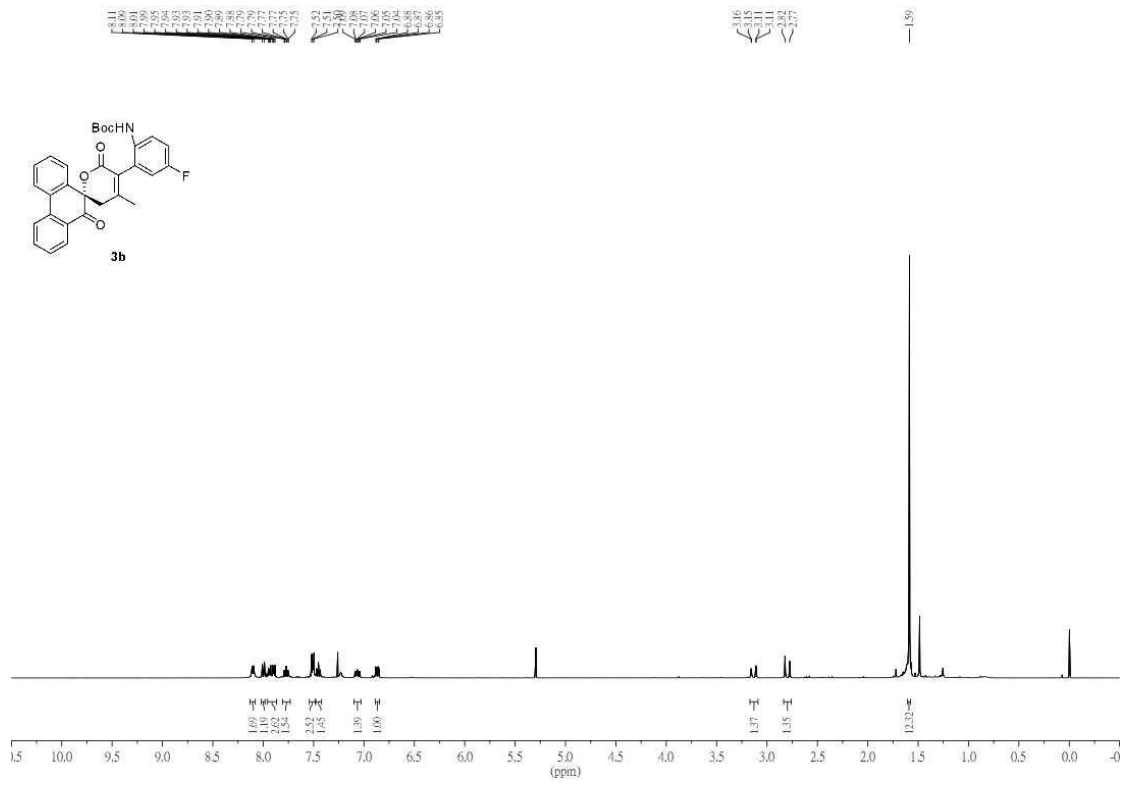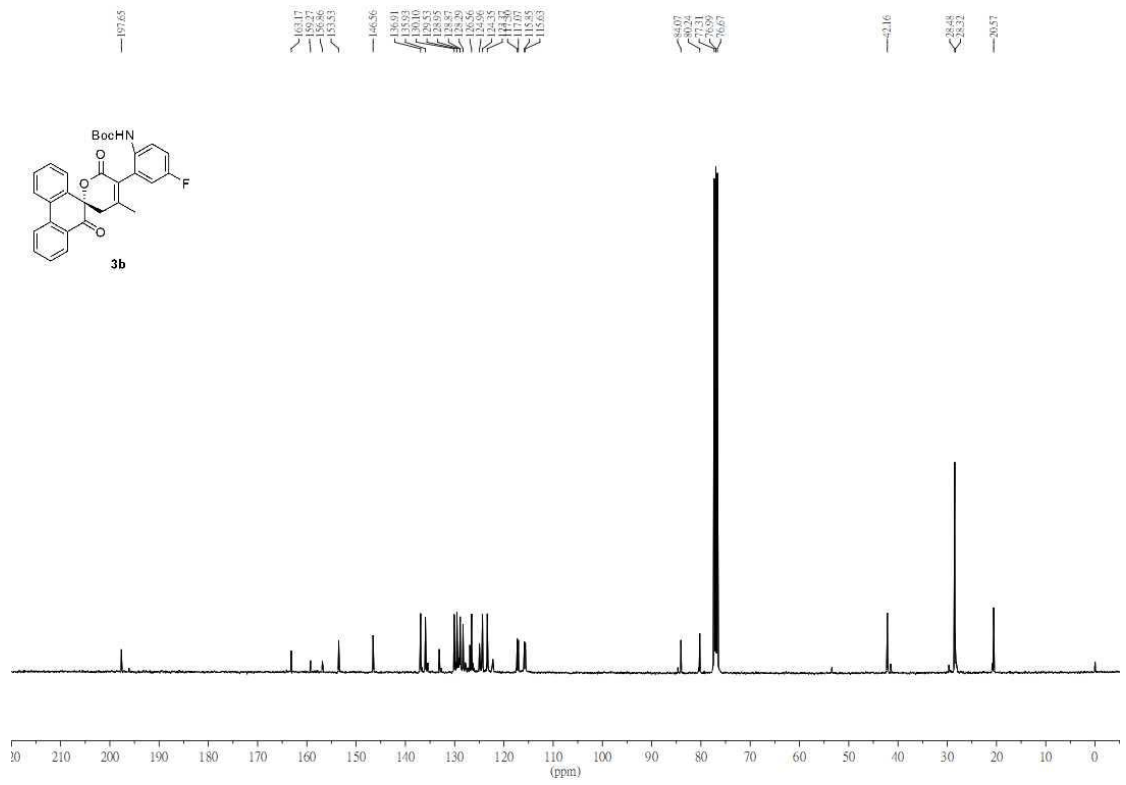



G129-5F-1-F\_fluorine-1-2.jdf

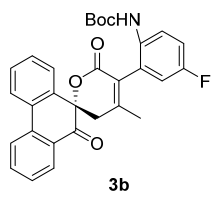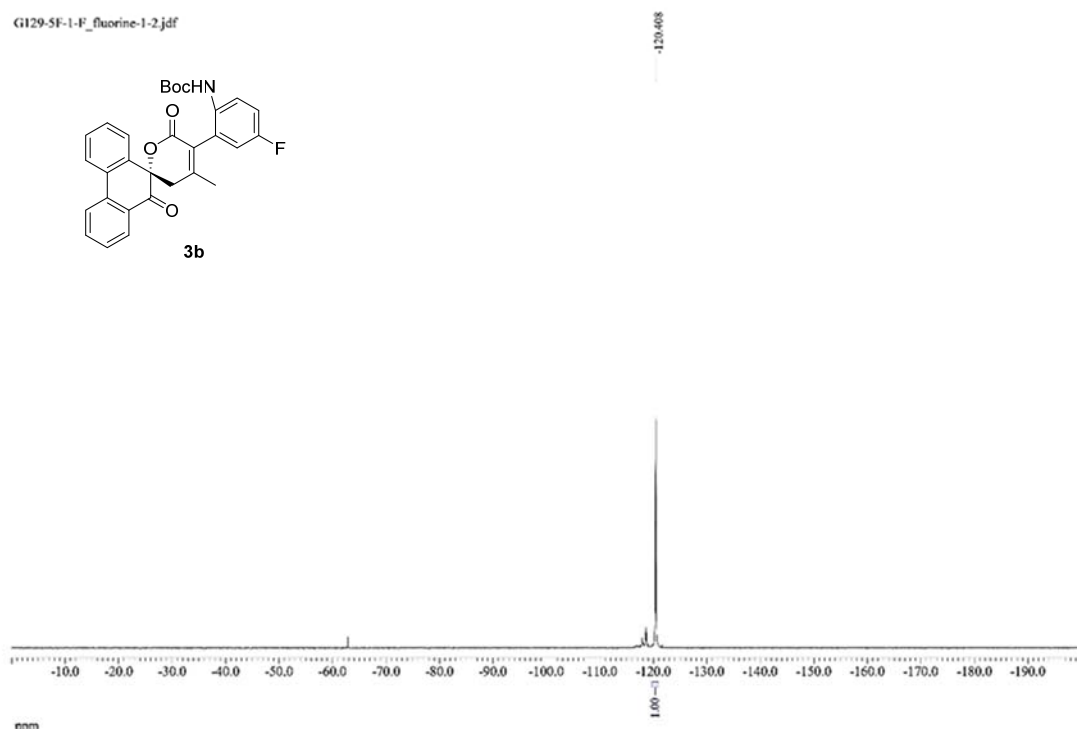

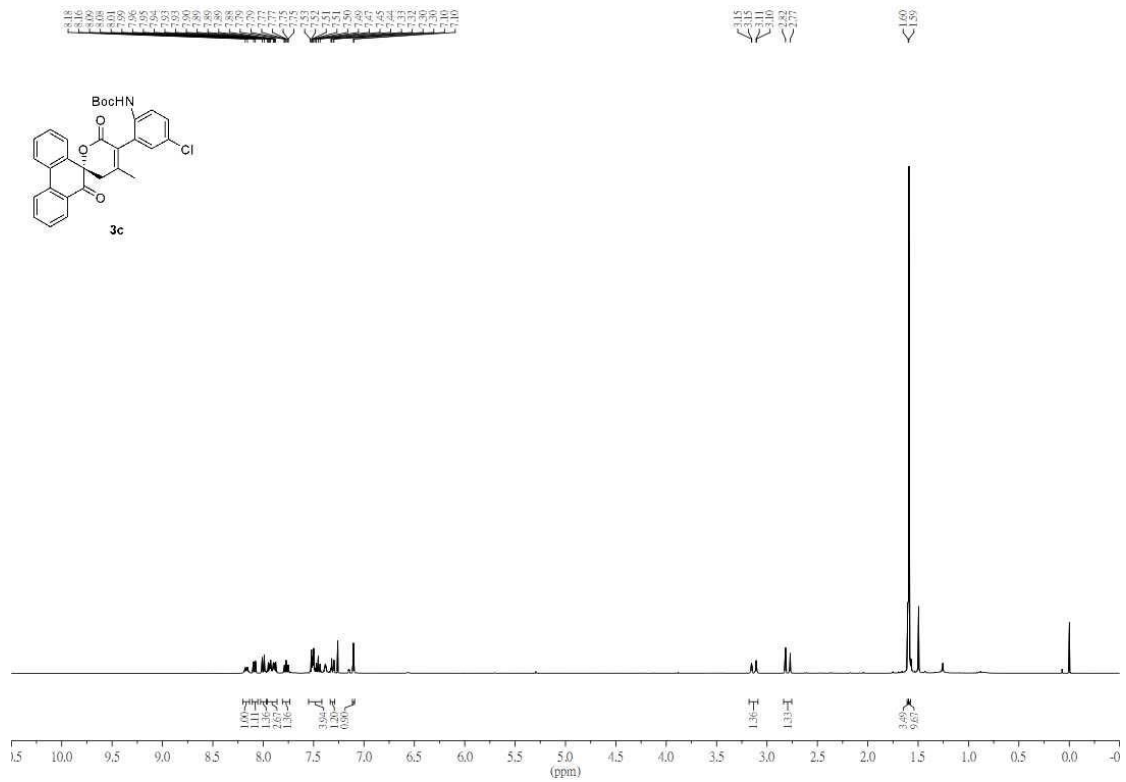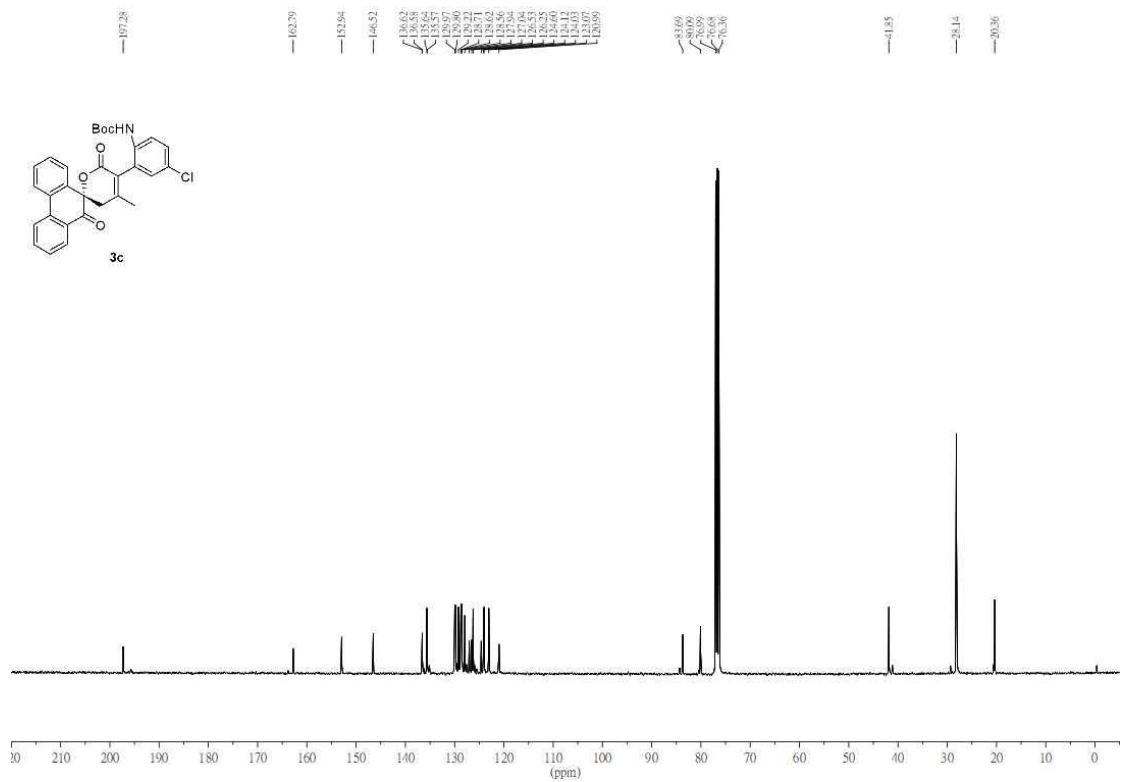

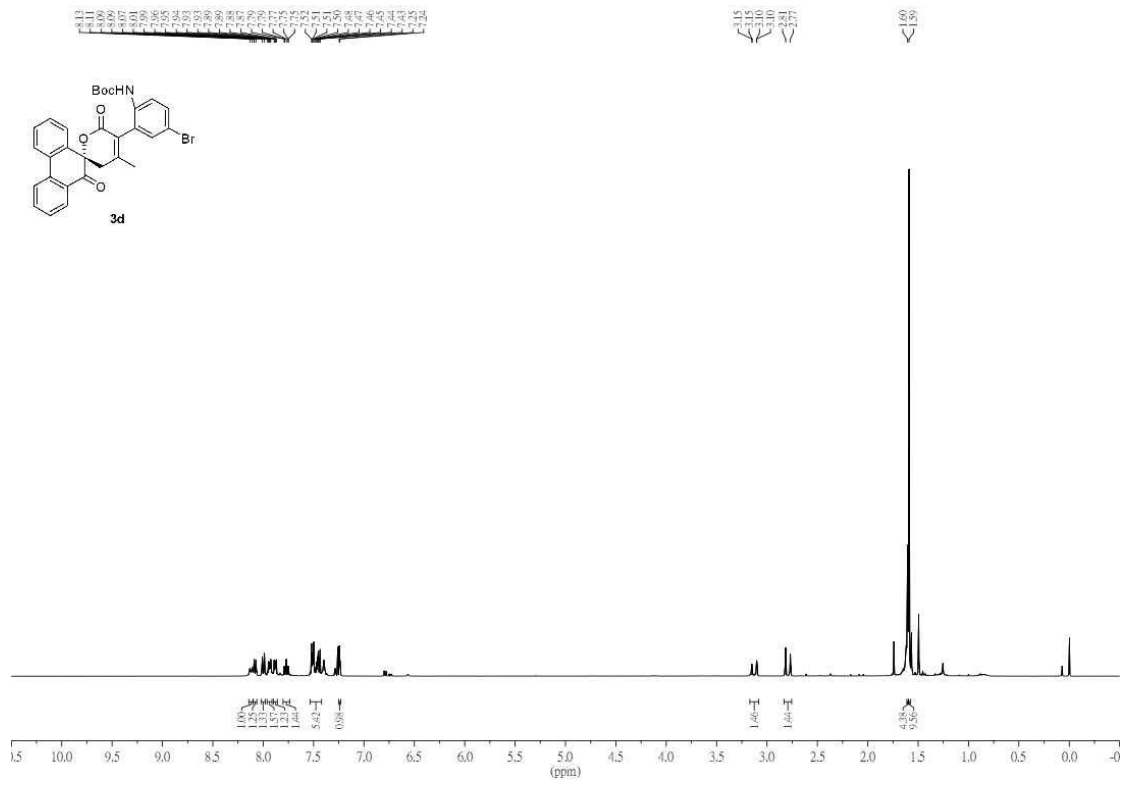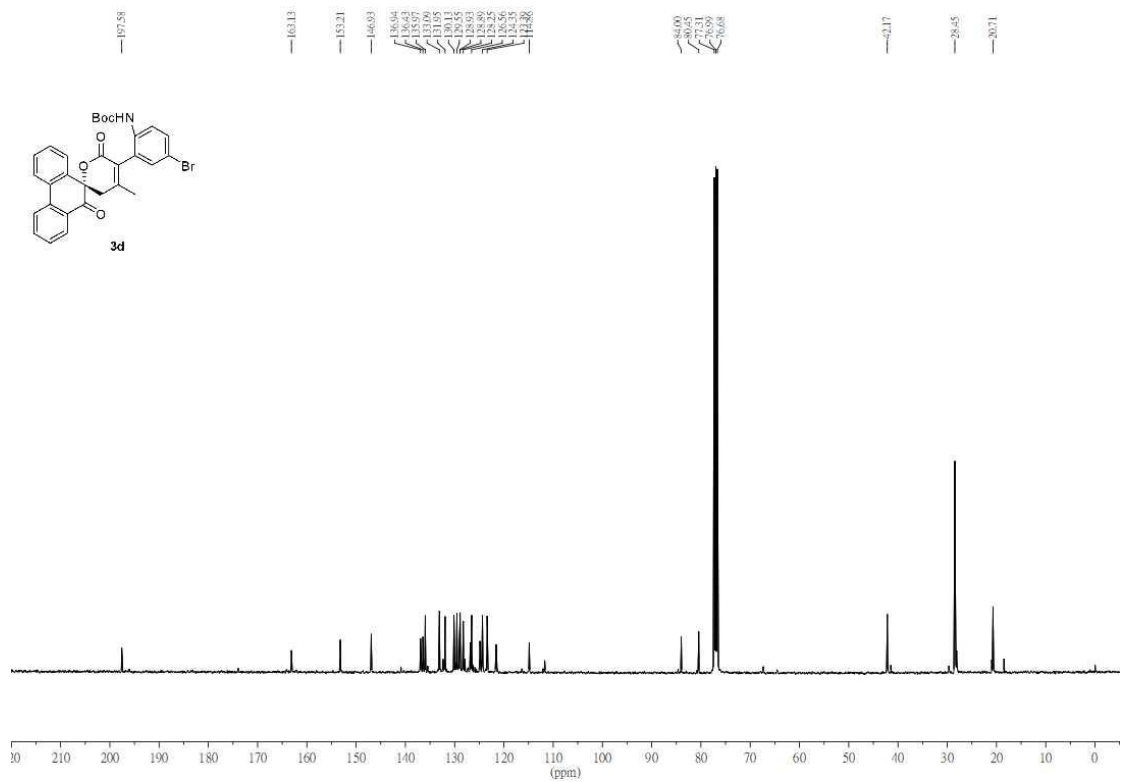

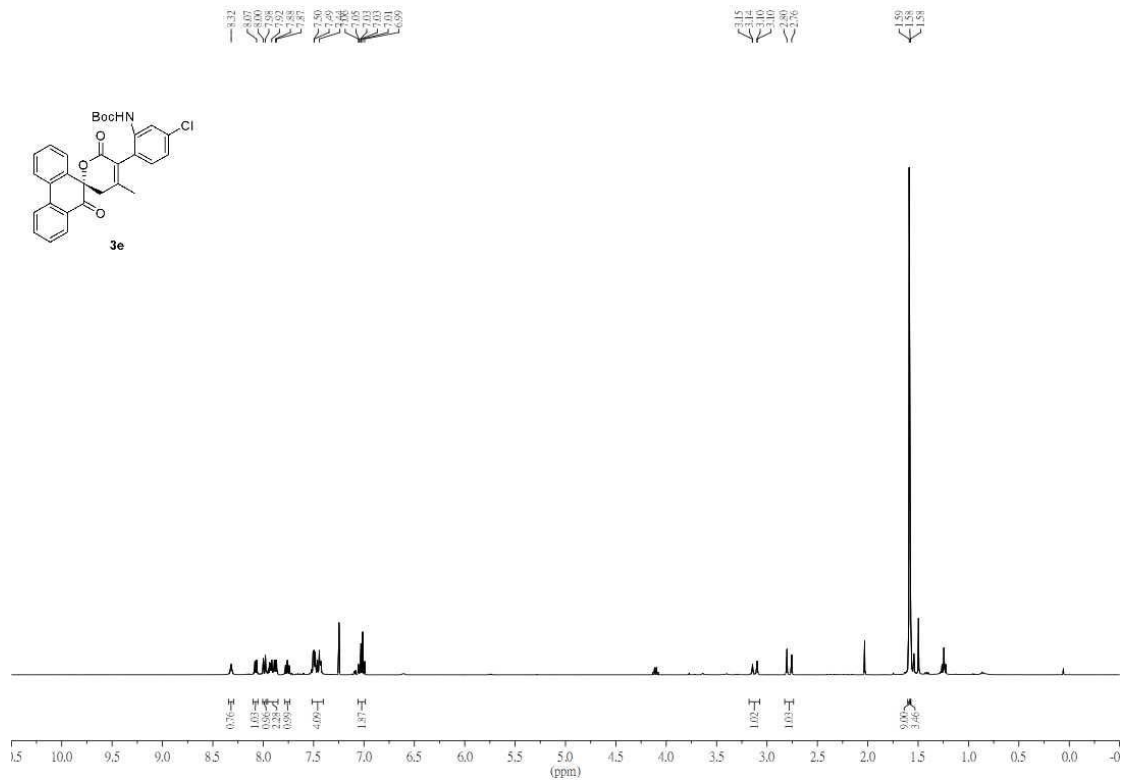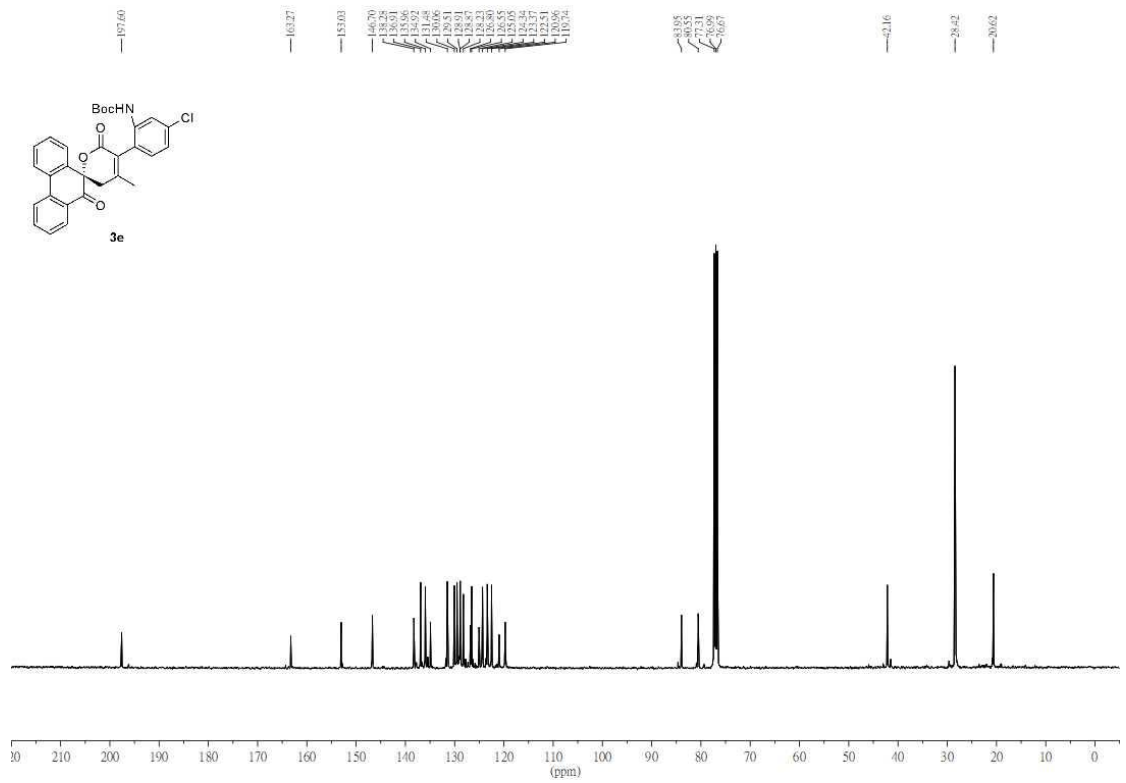

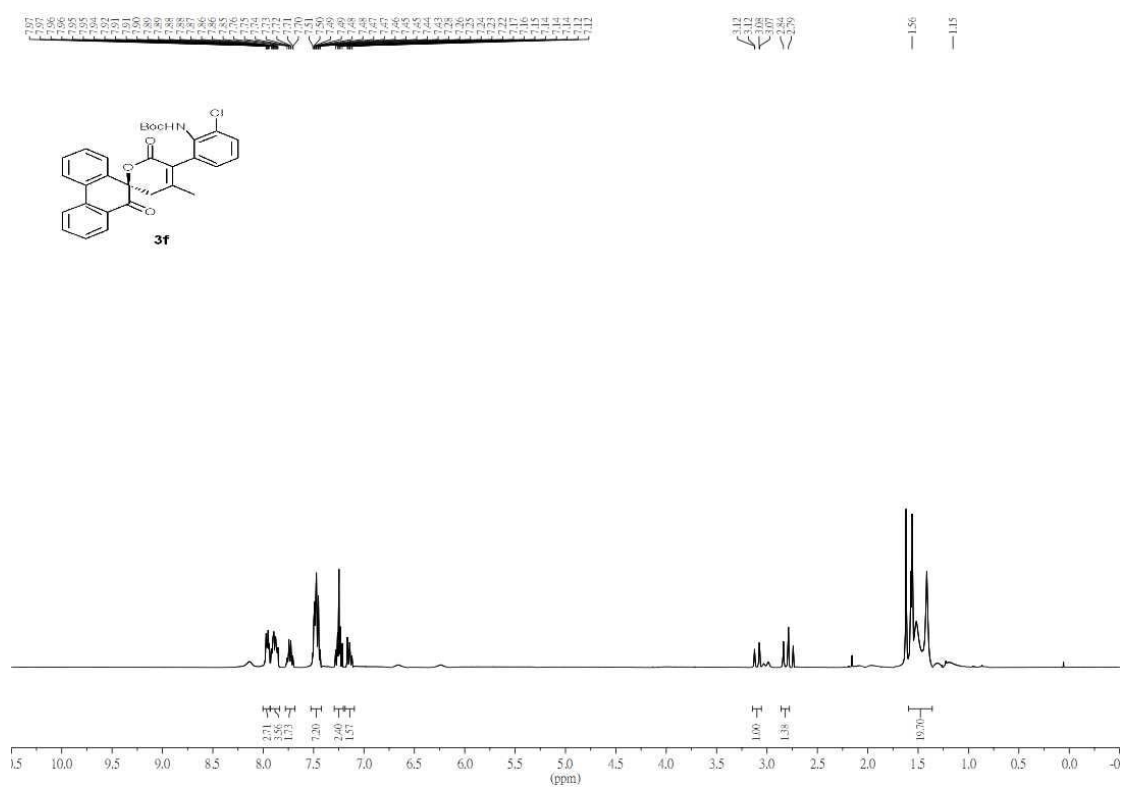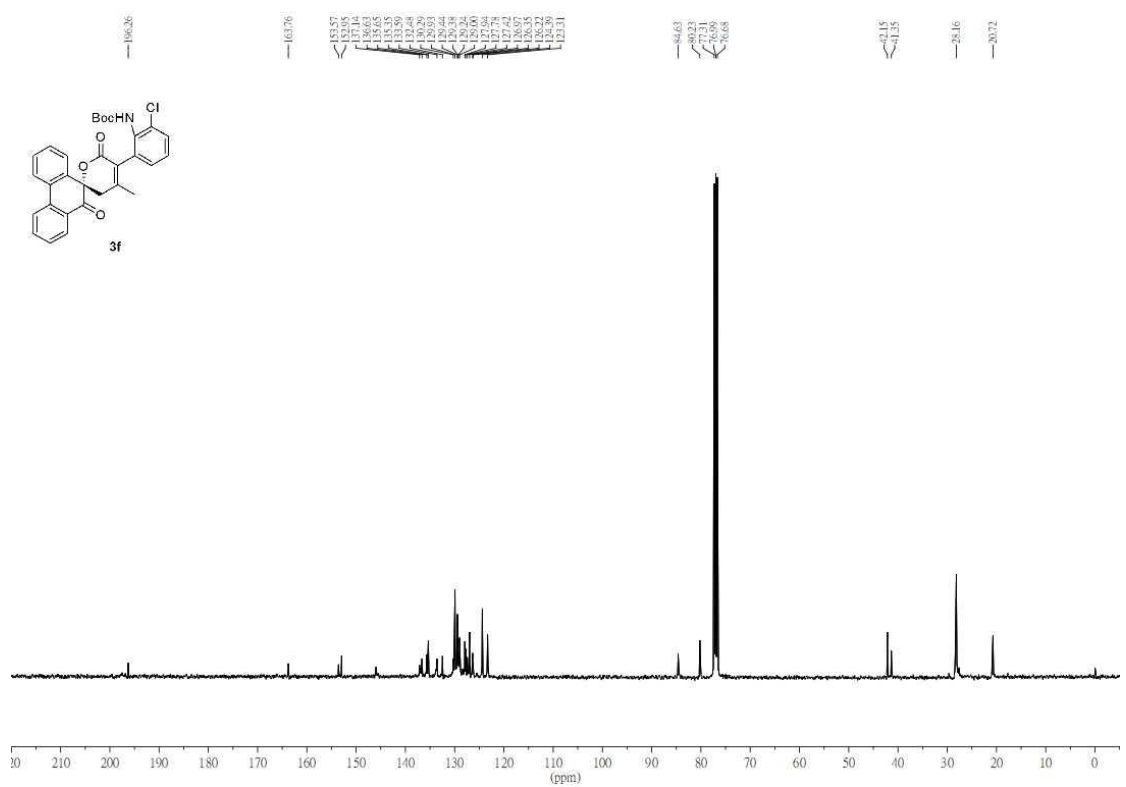

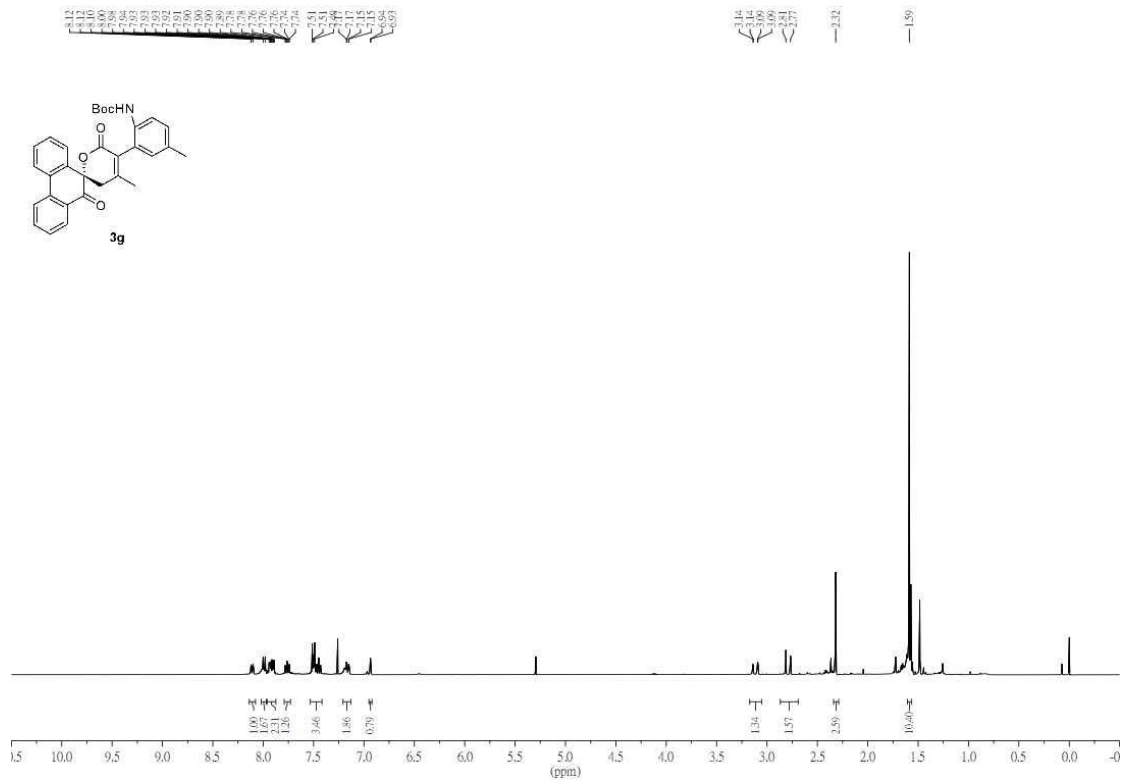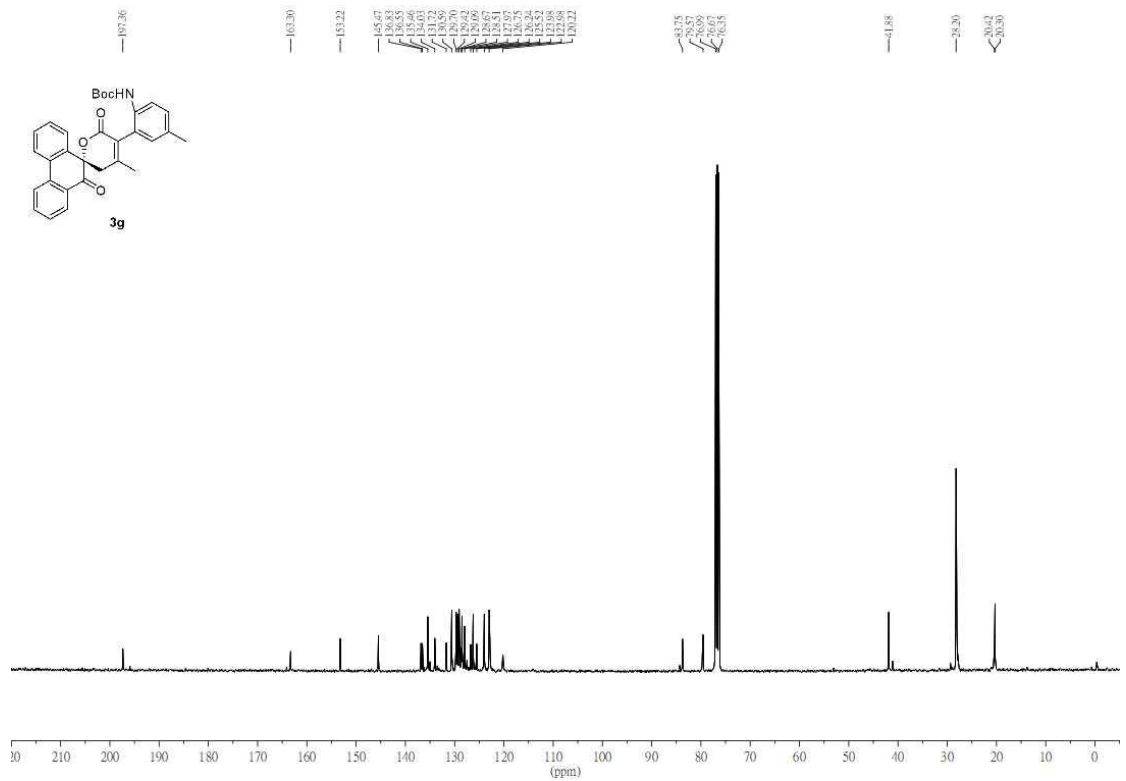

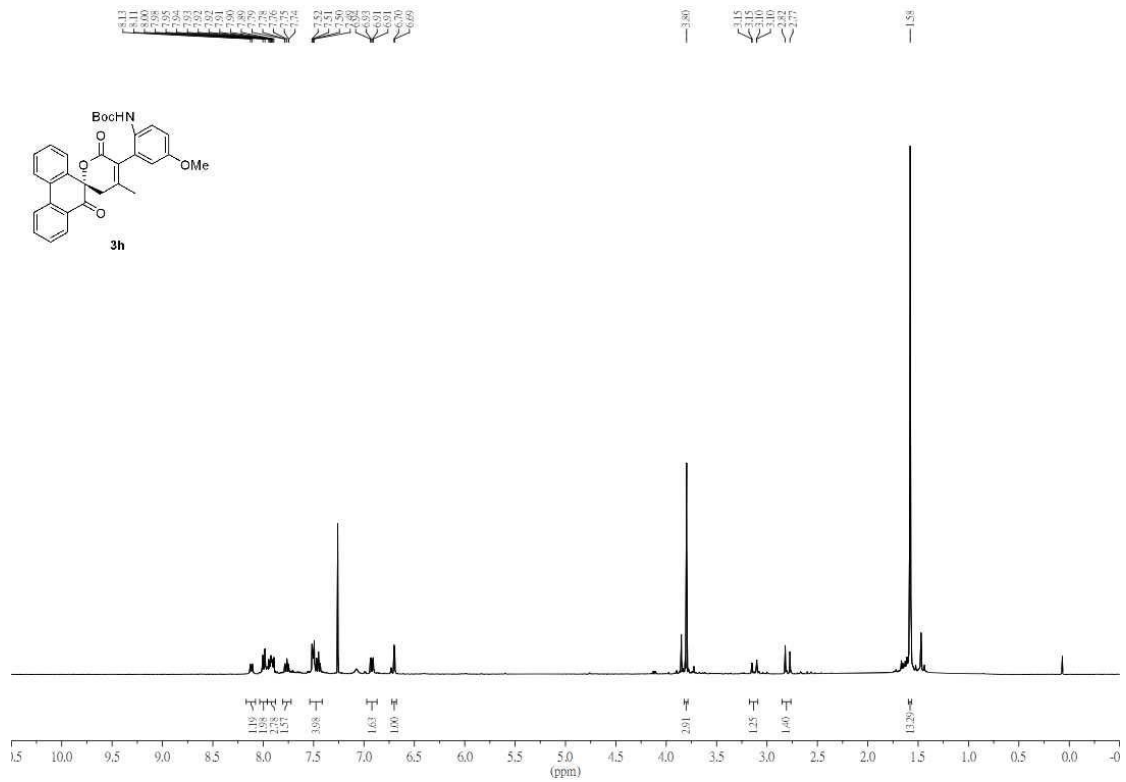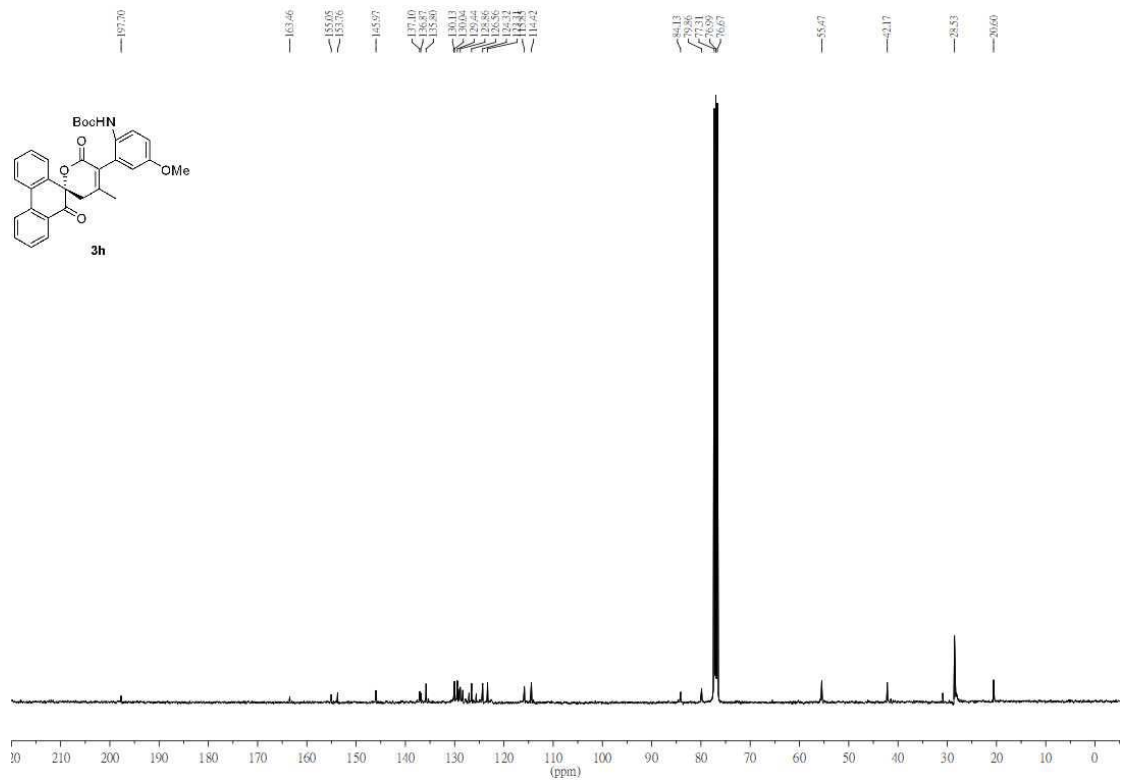

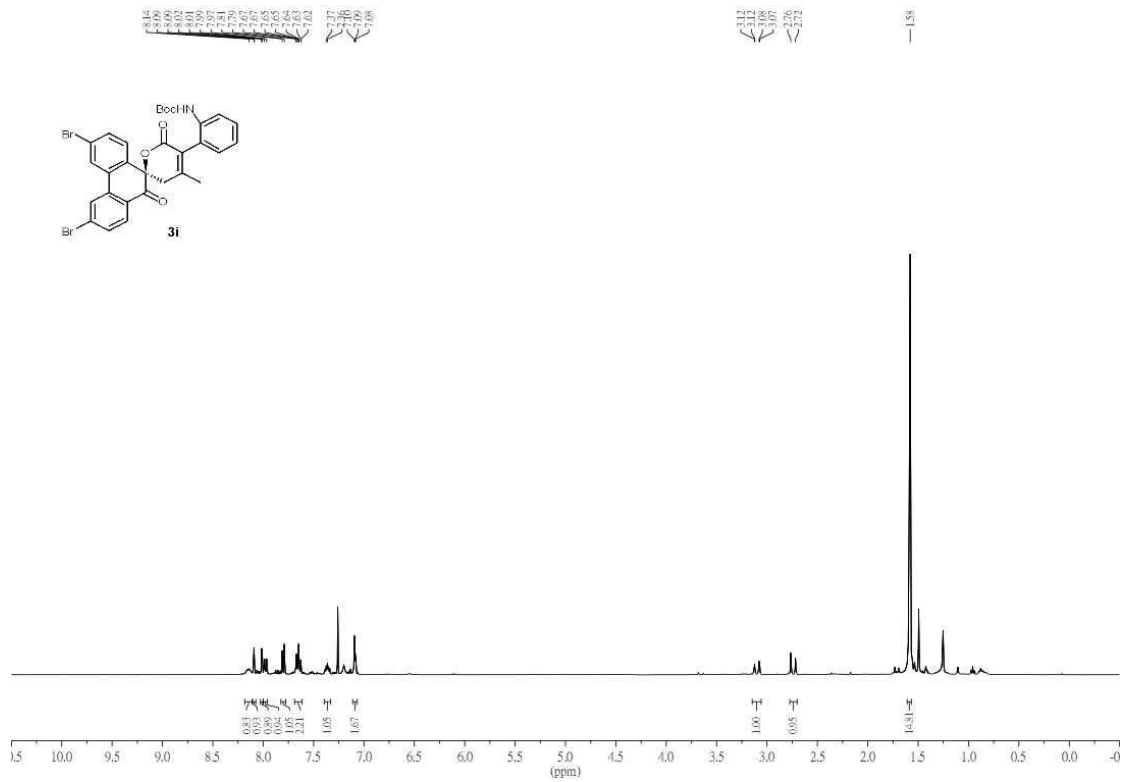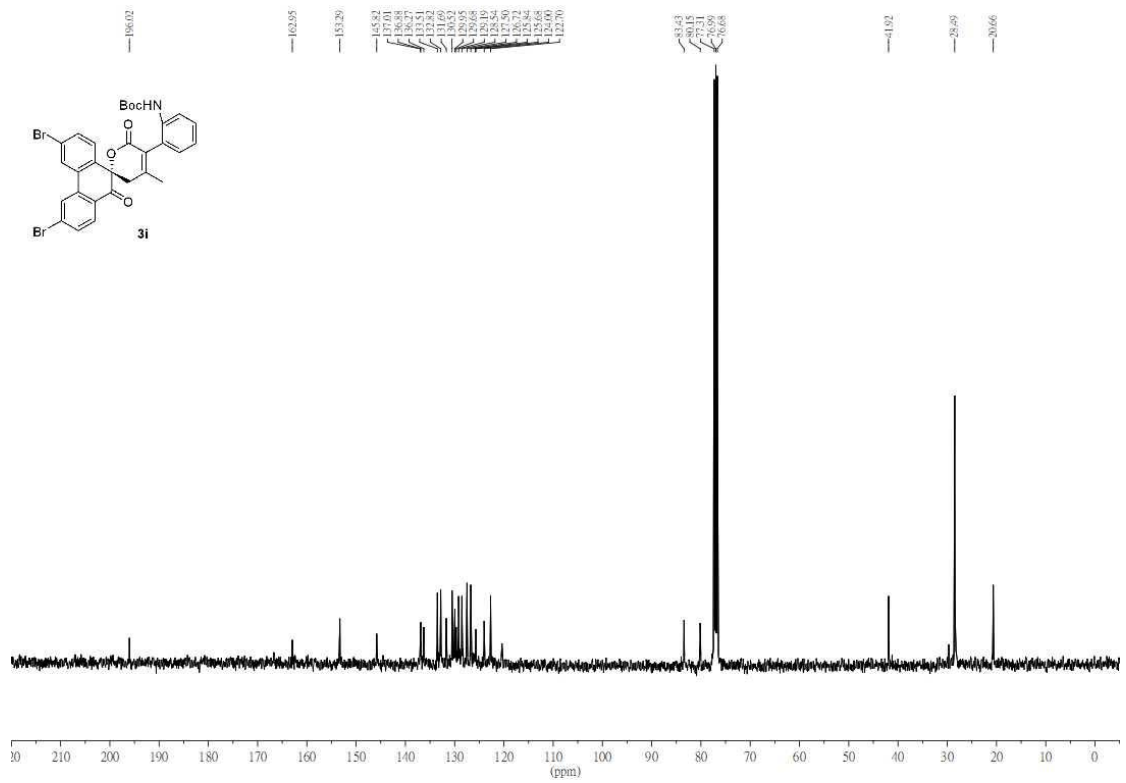



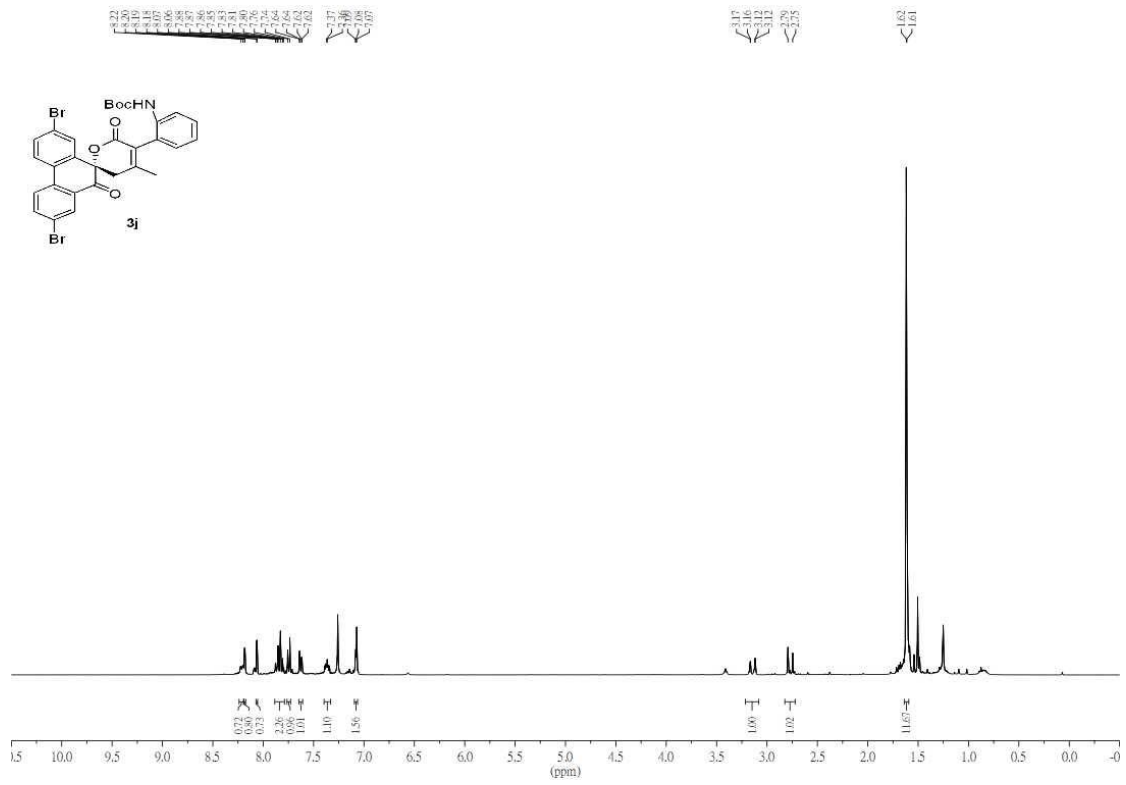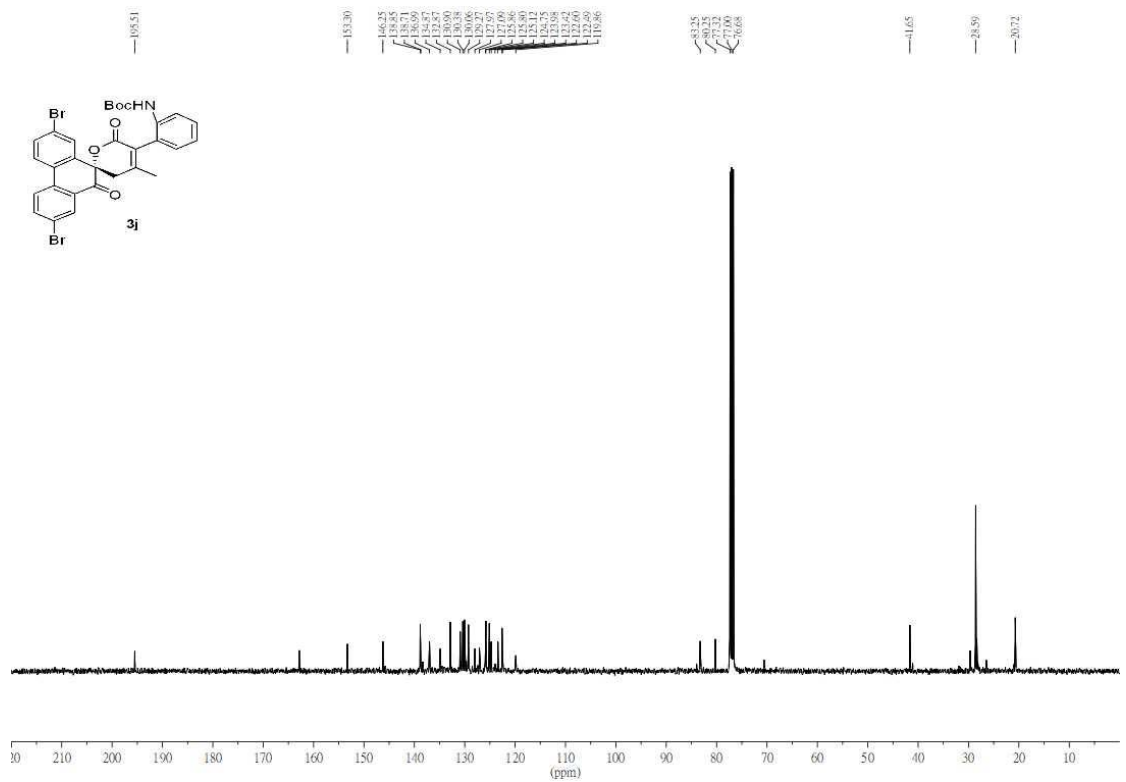

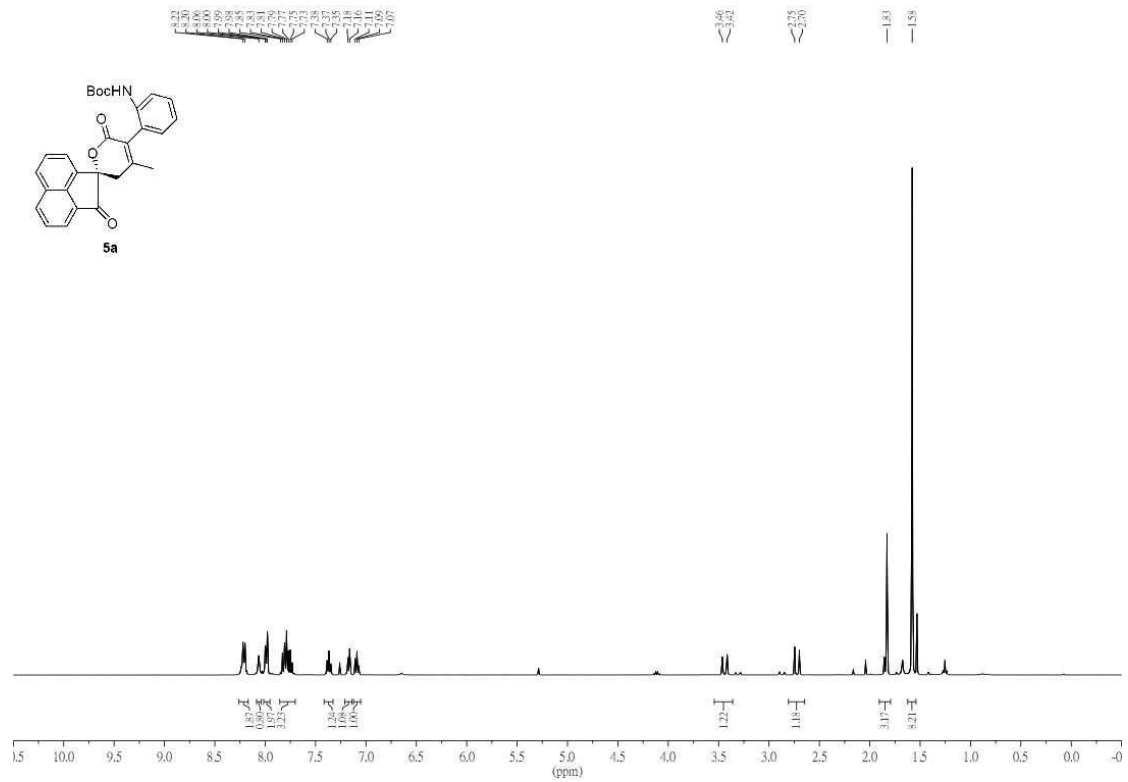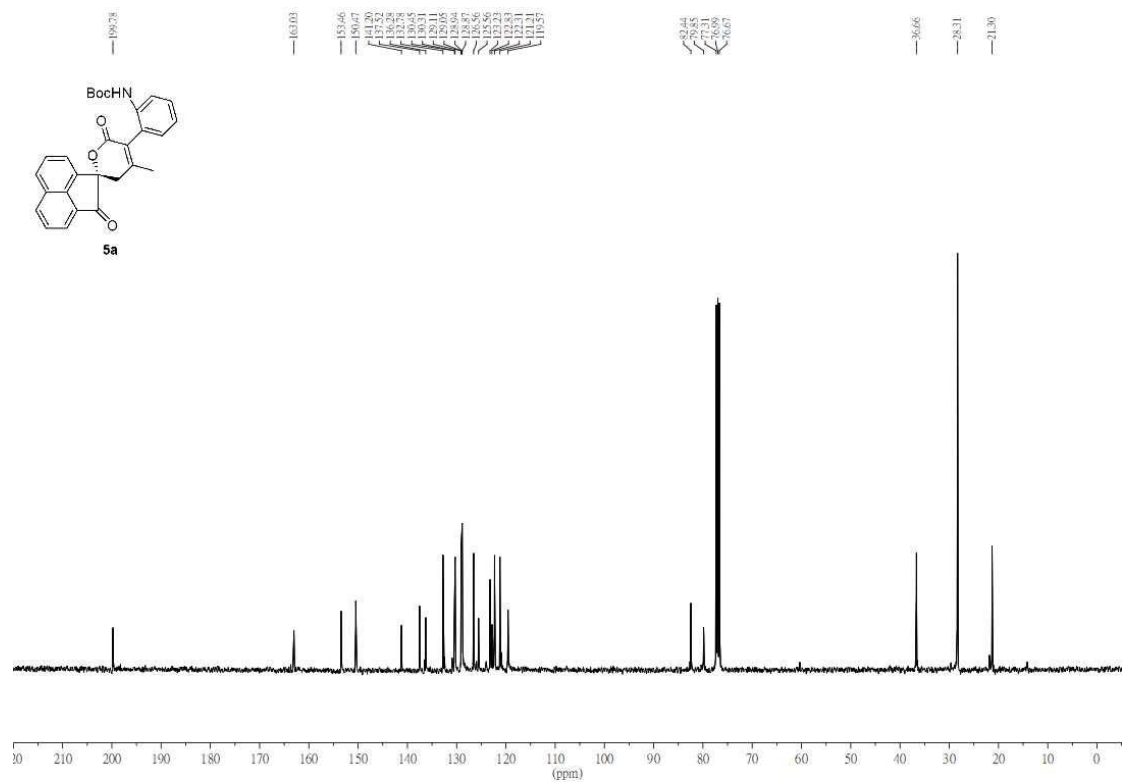

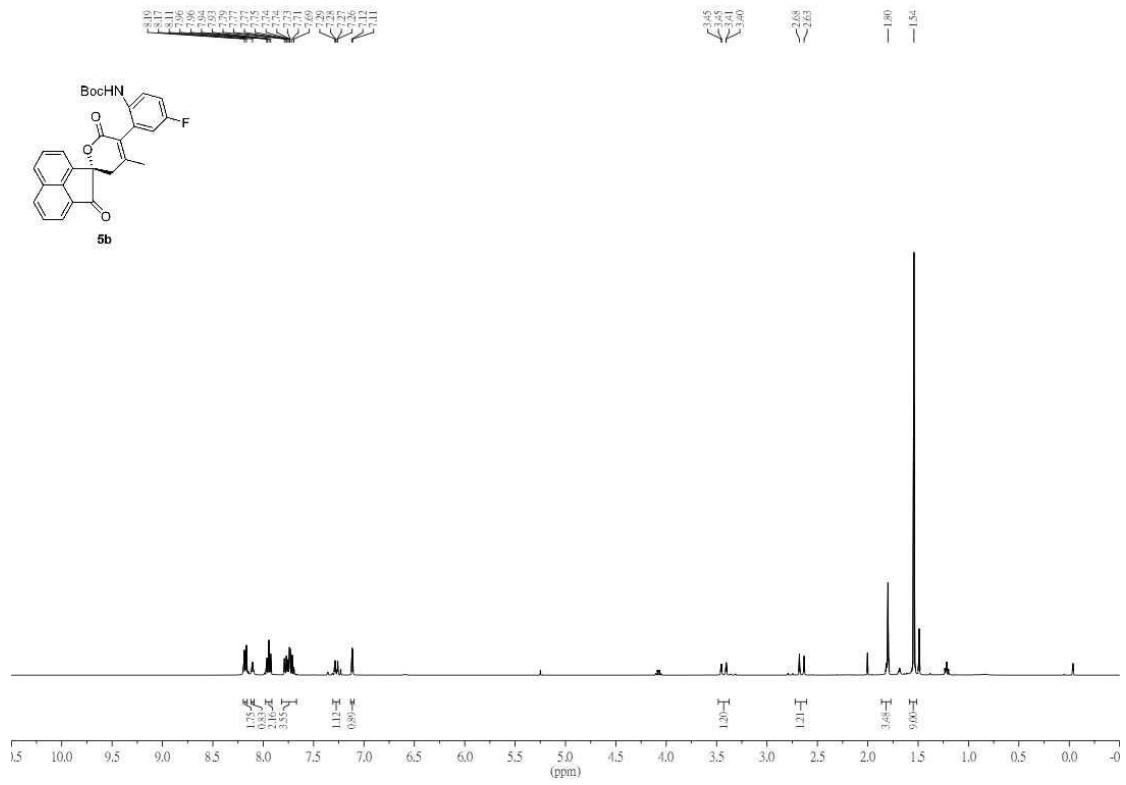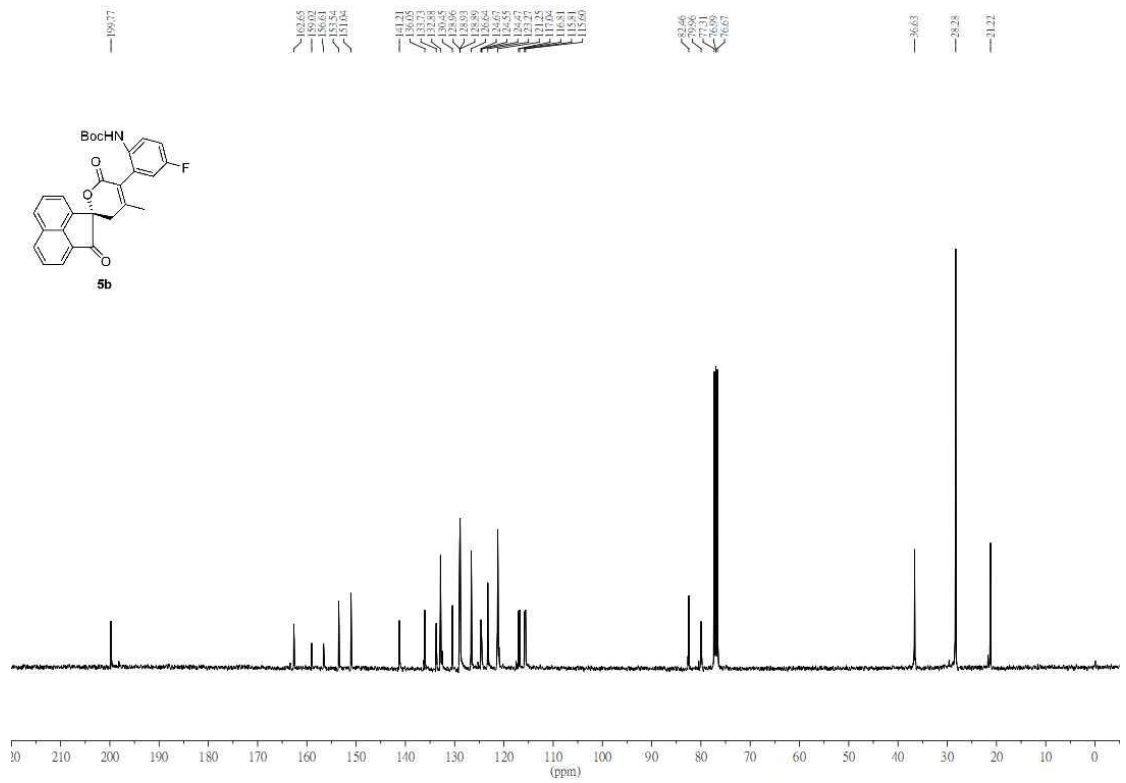

G129-SF-2-F\_fluorine-1-2.pdf

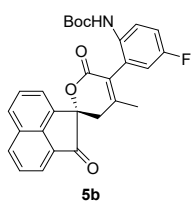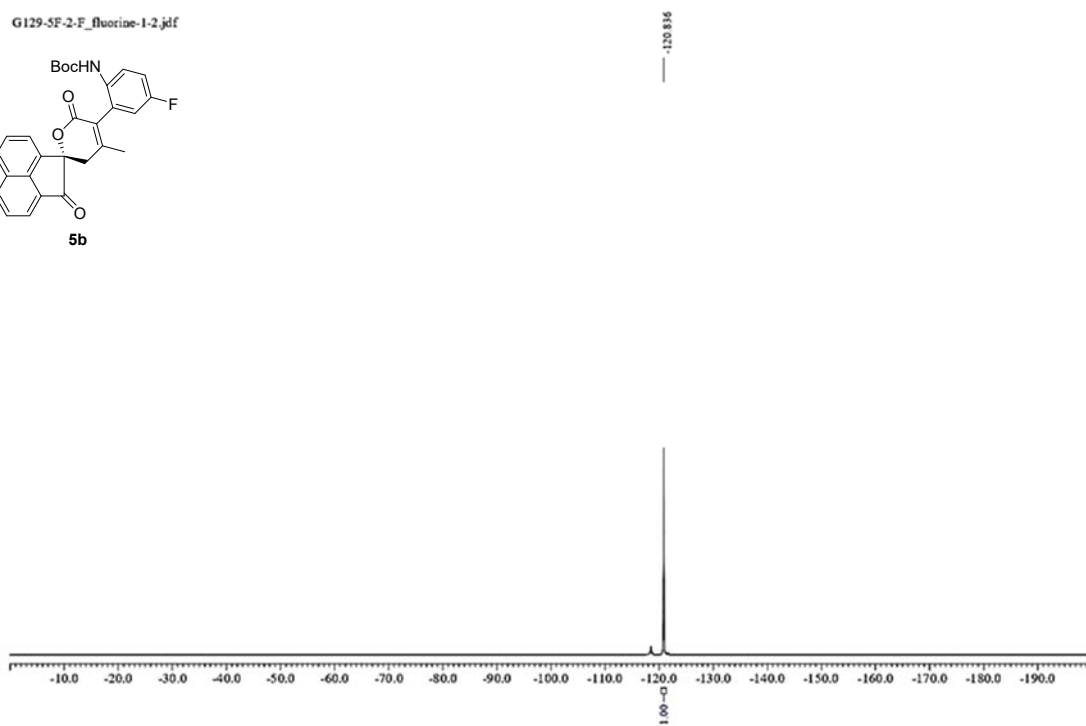

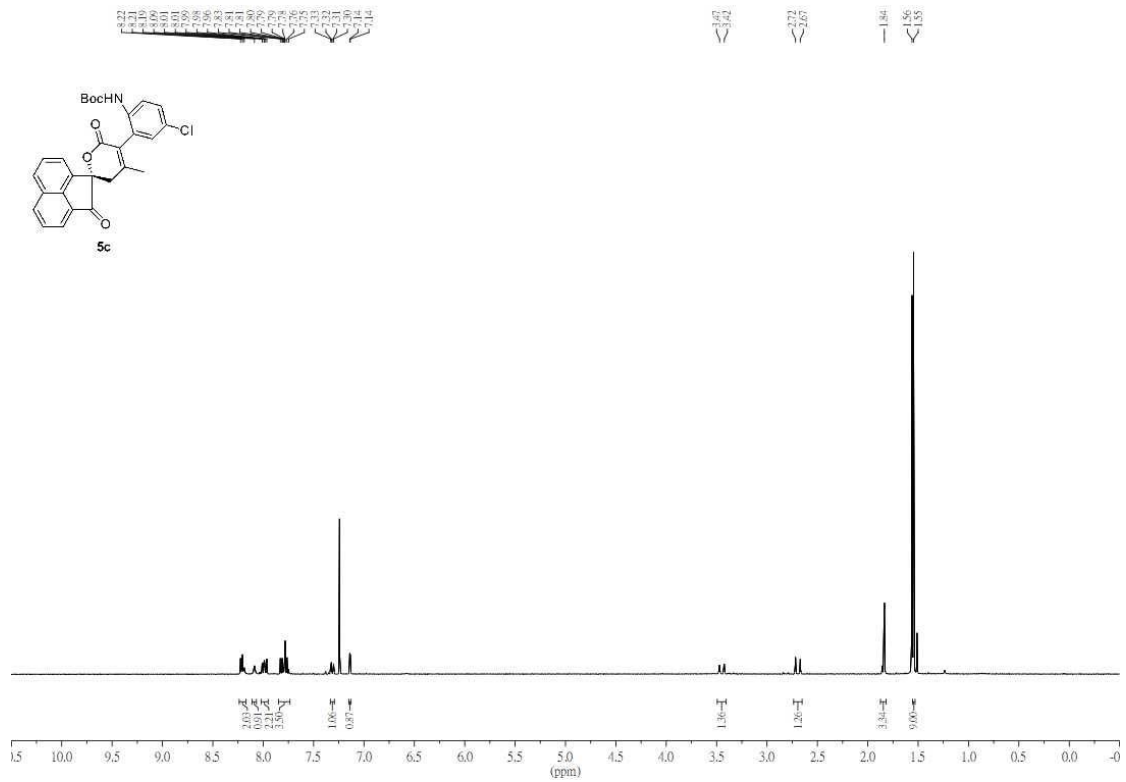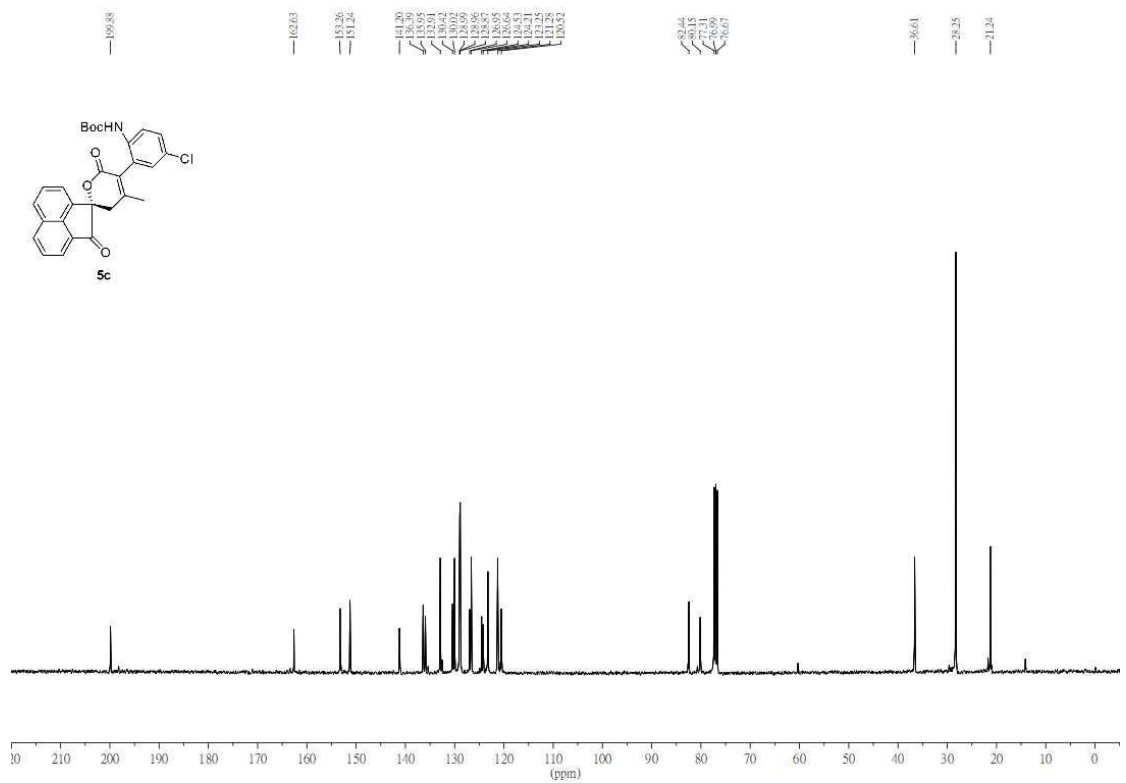

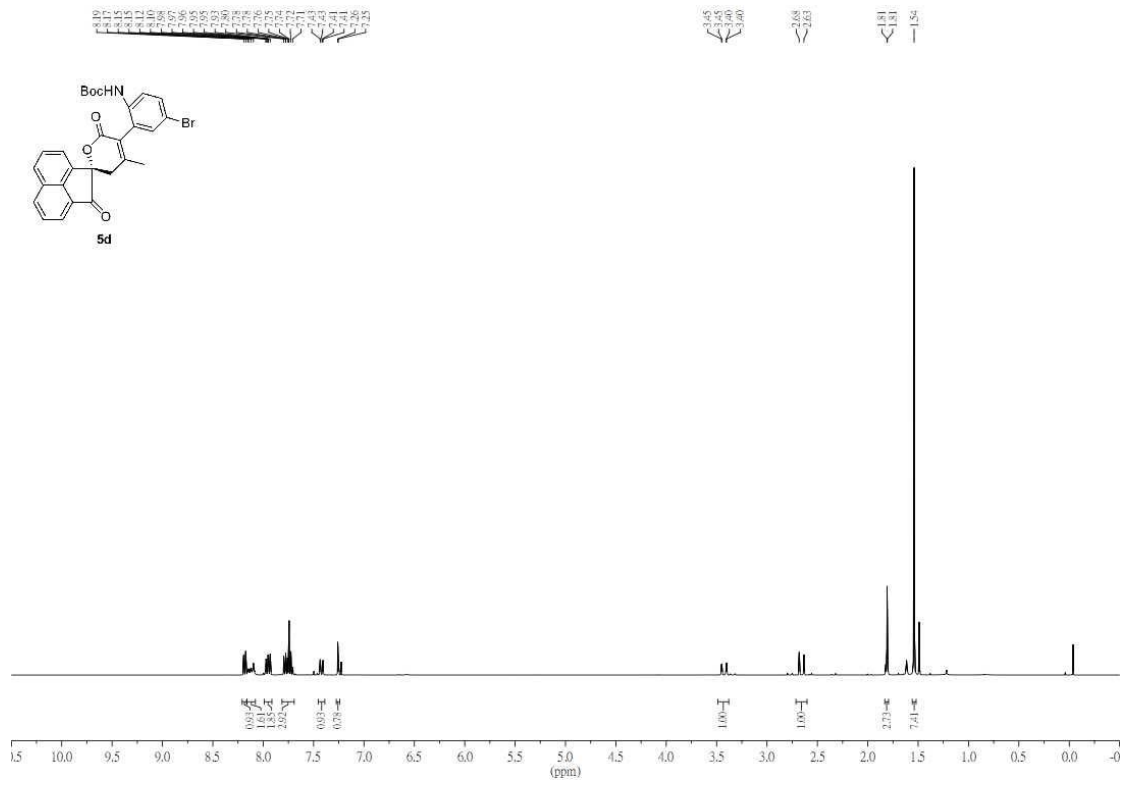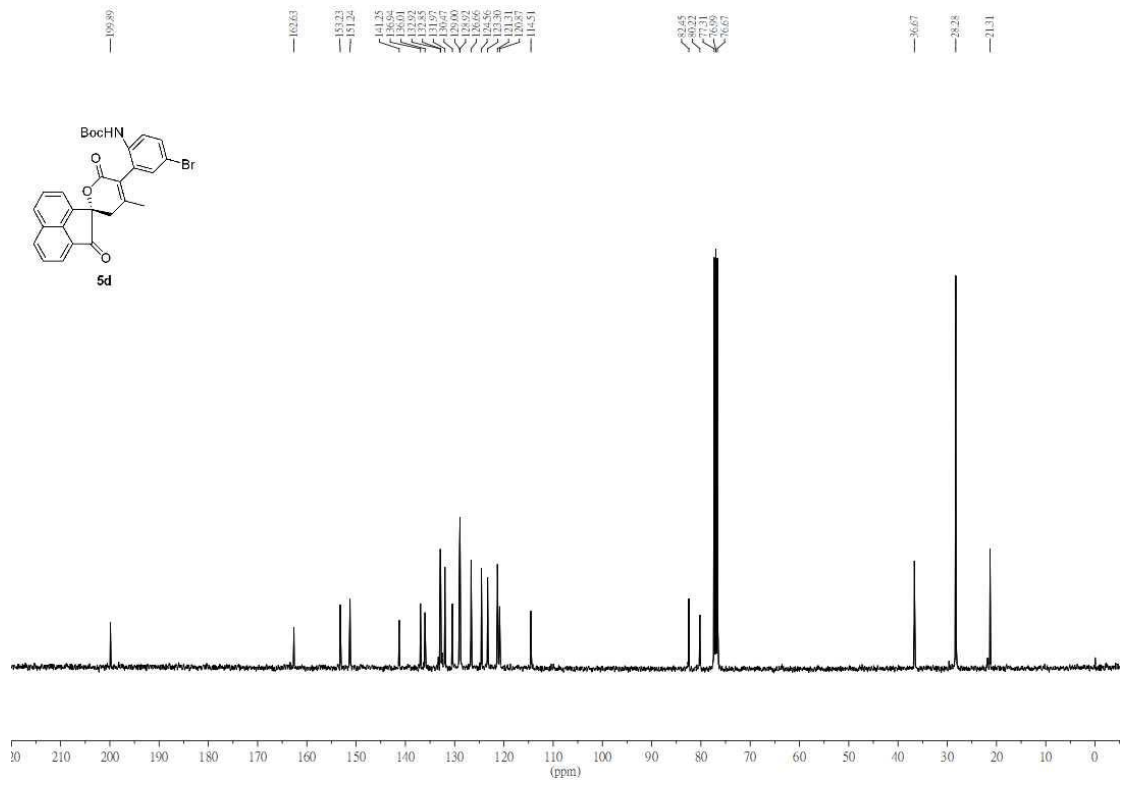

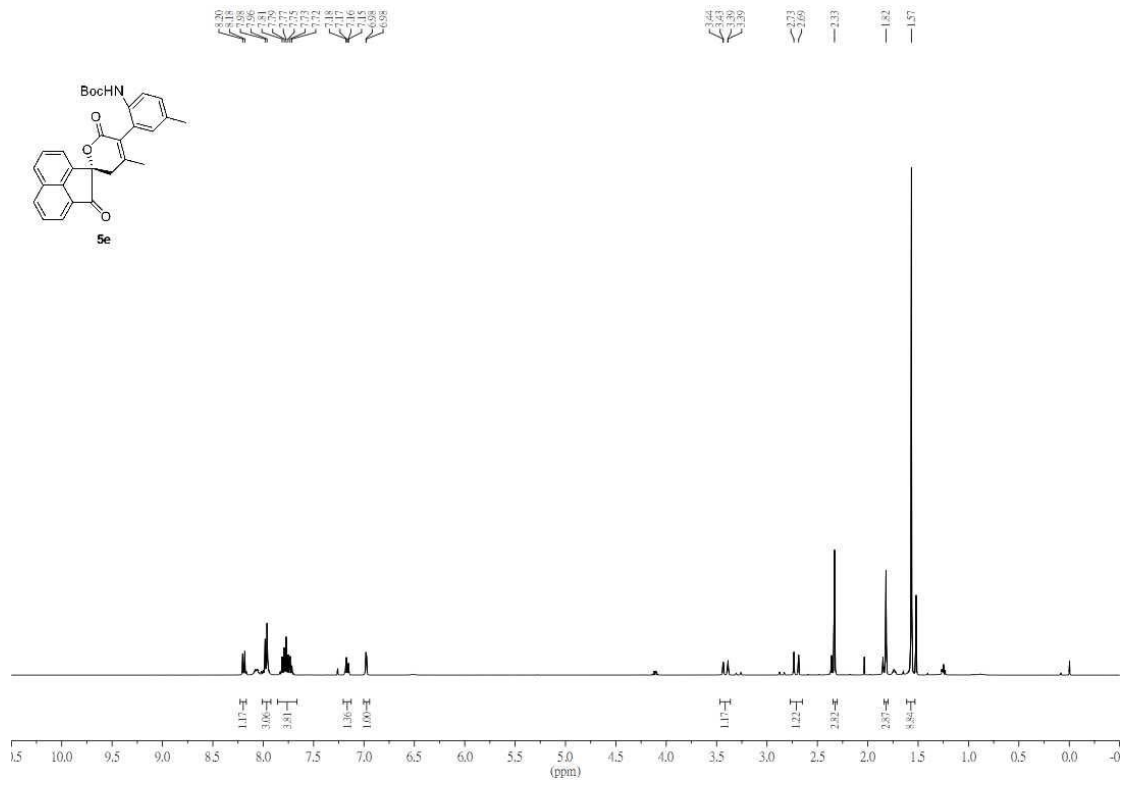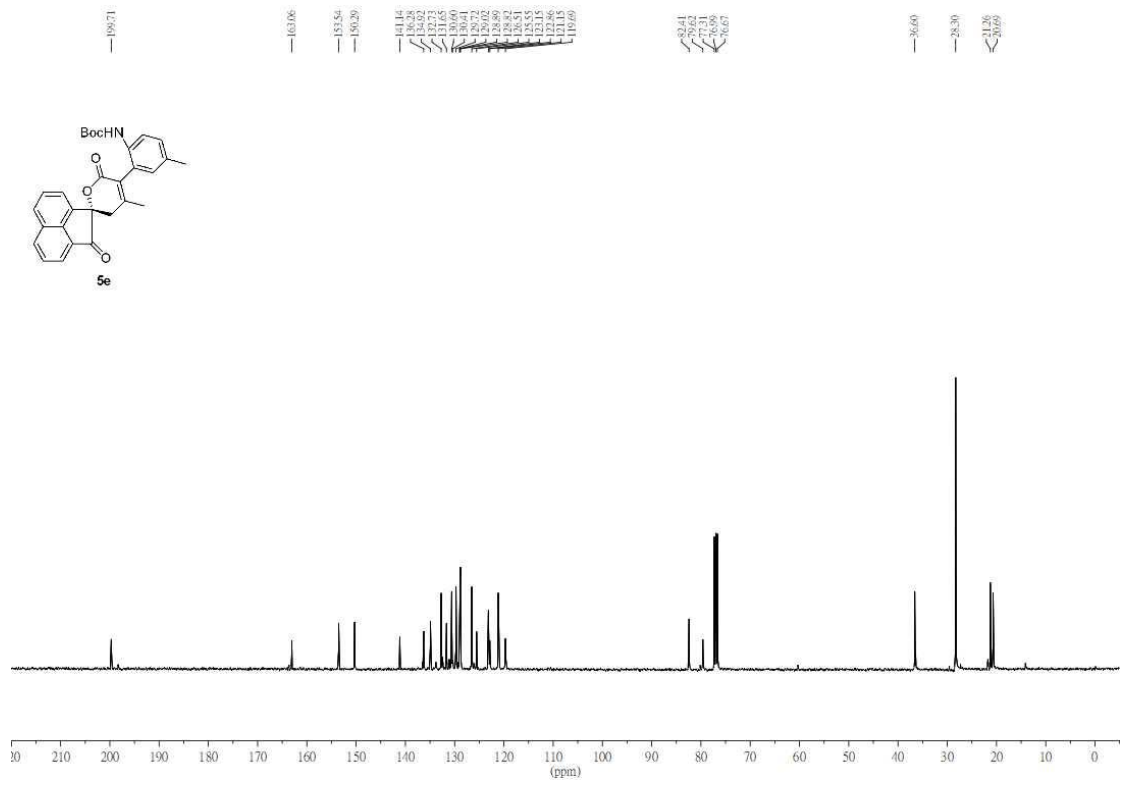

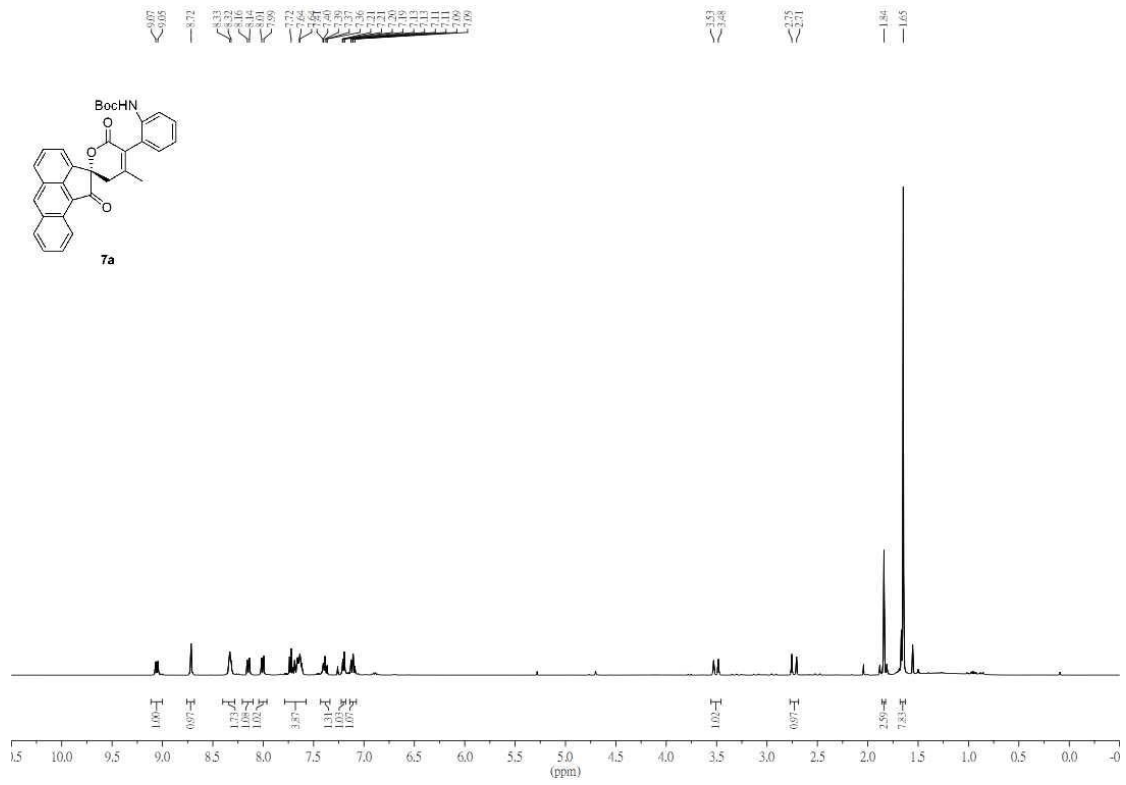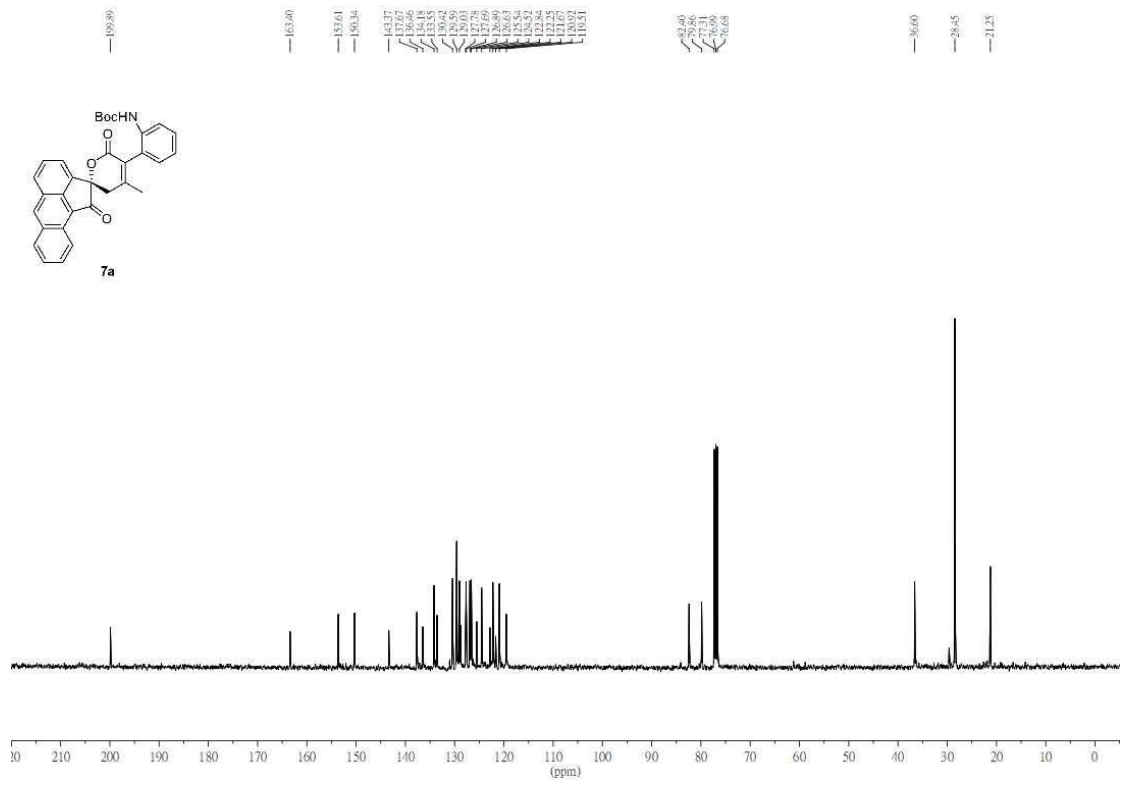



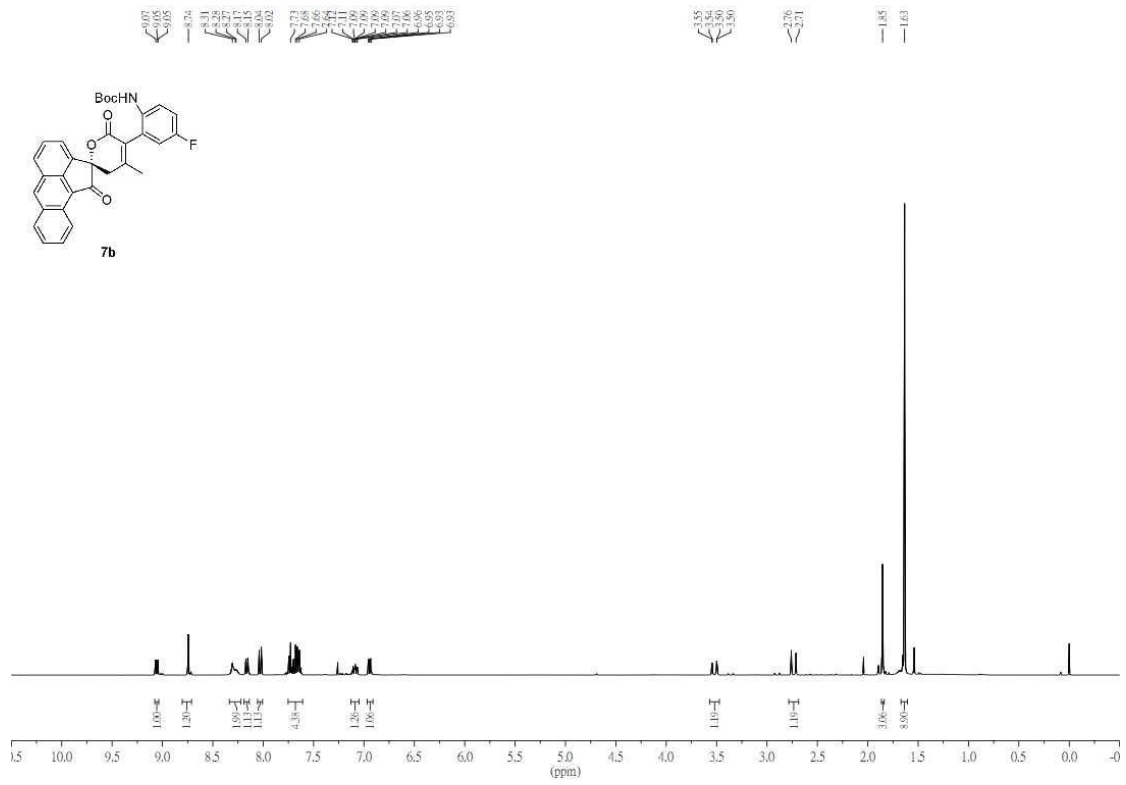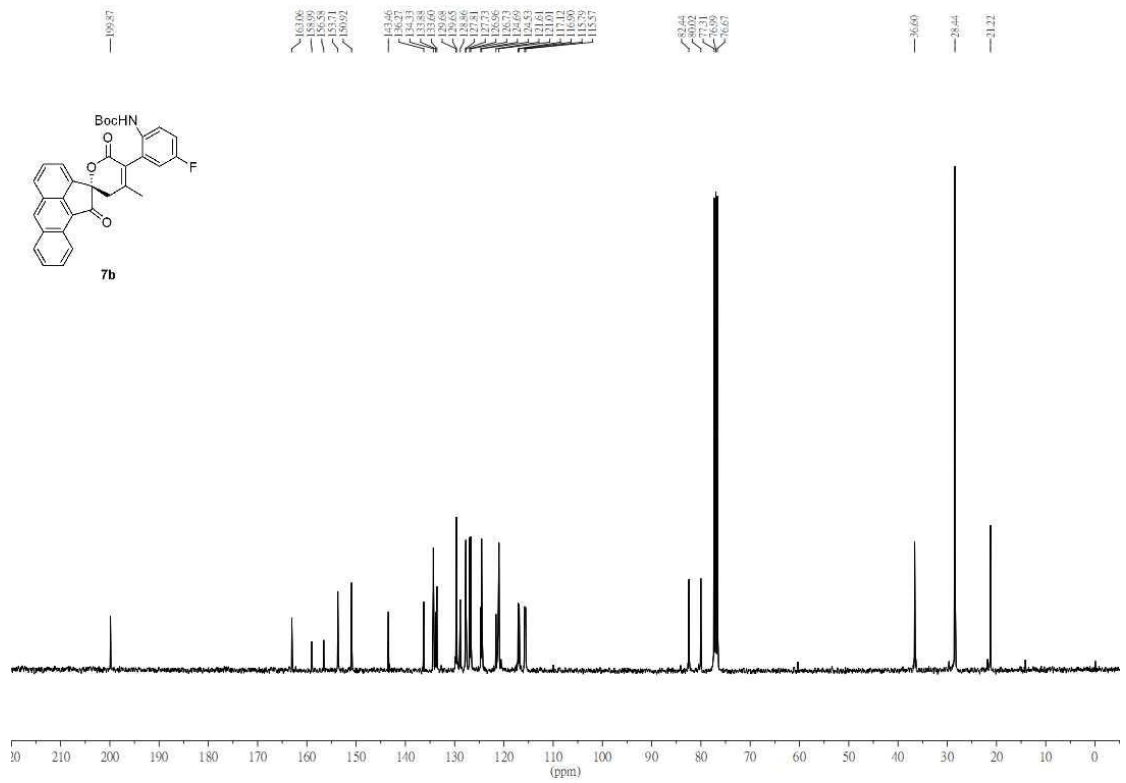

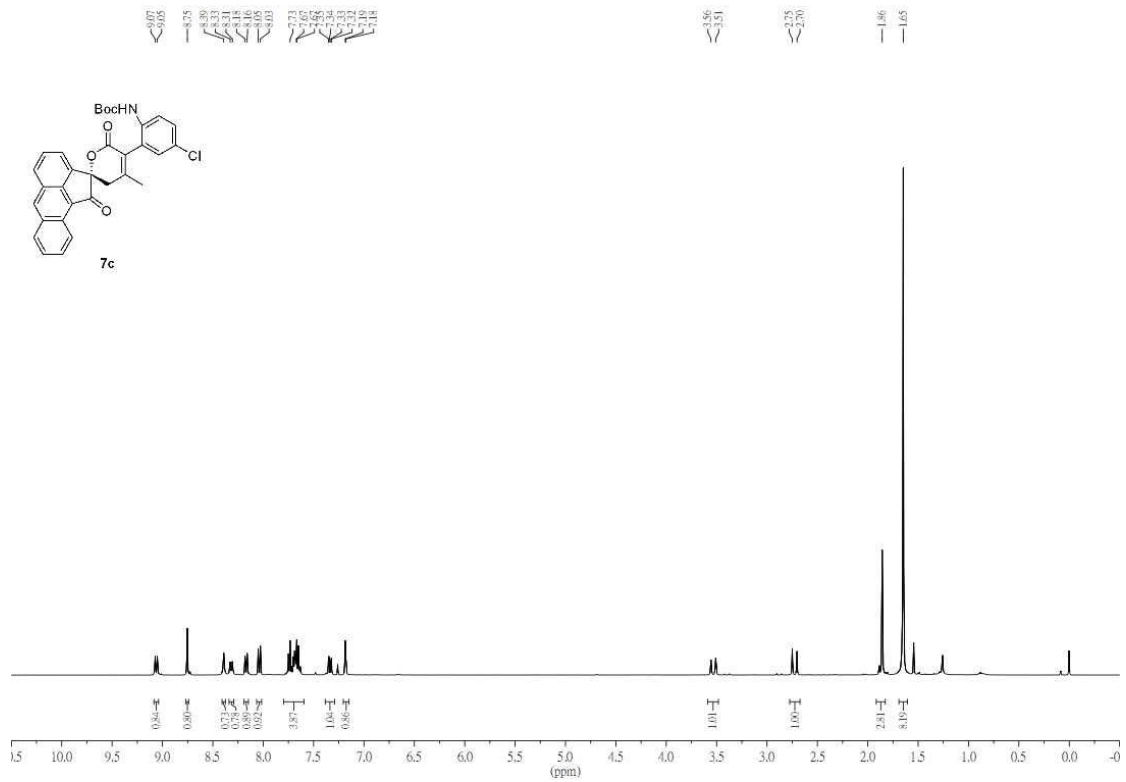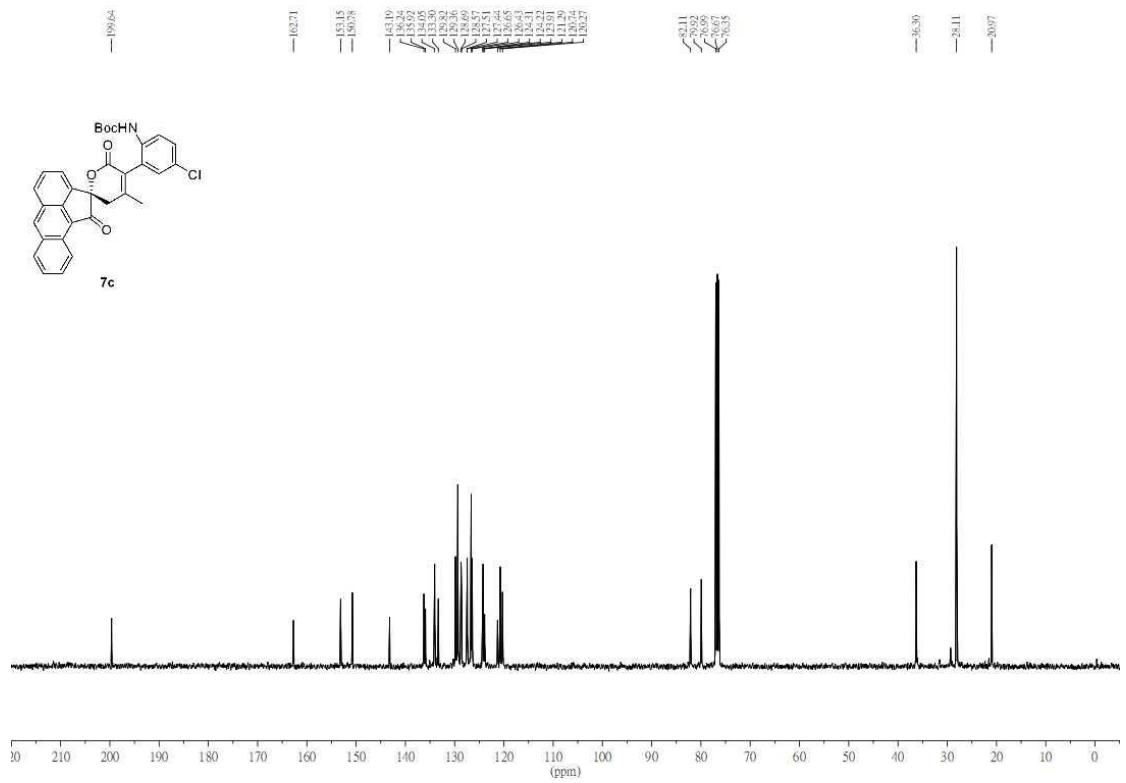

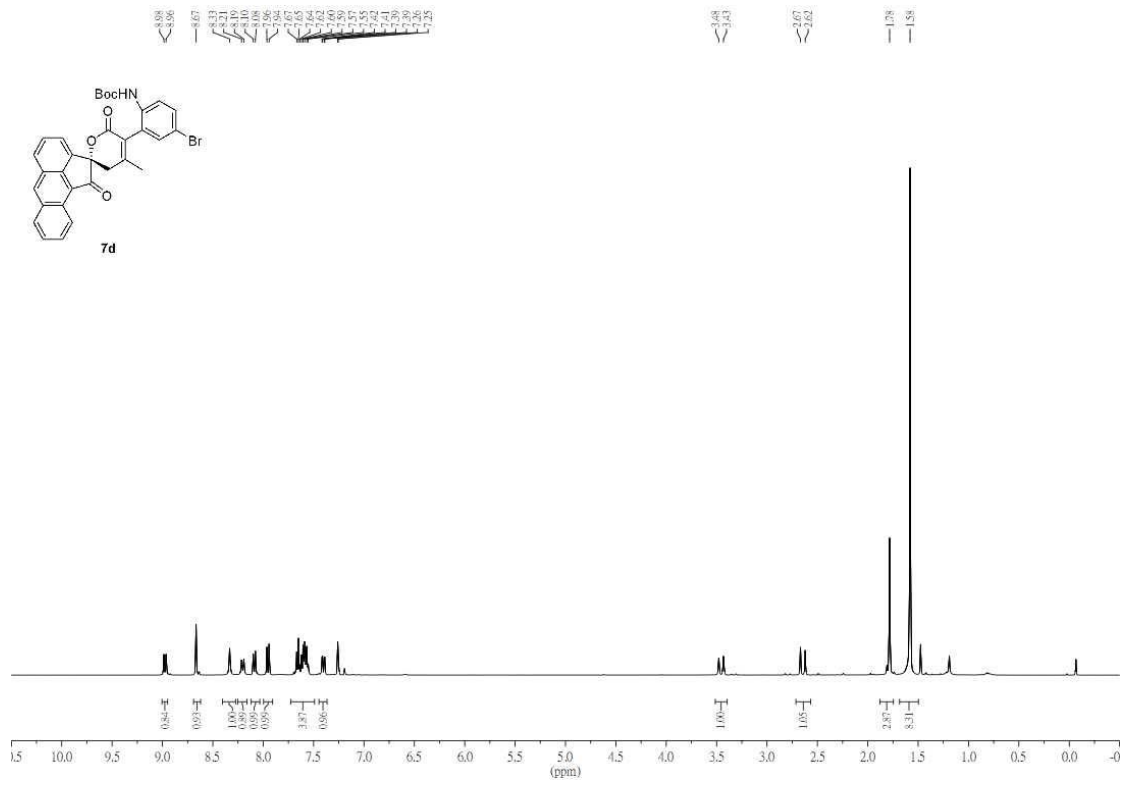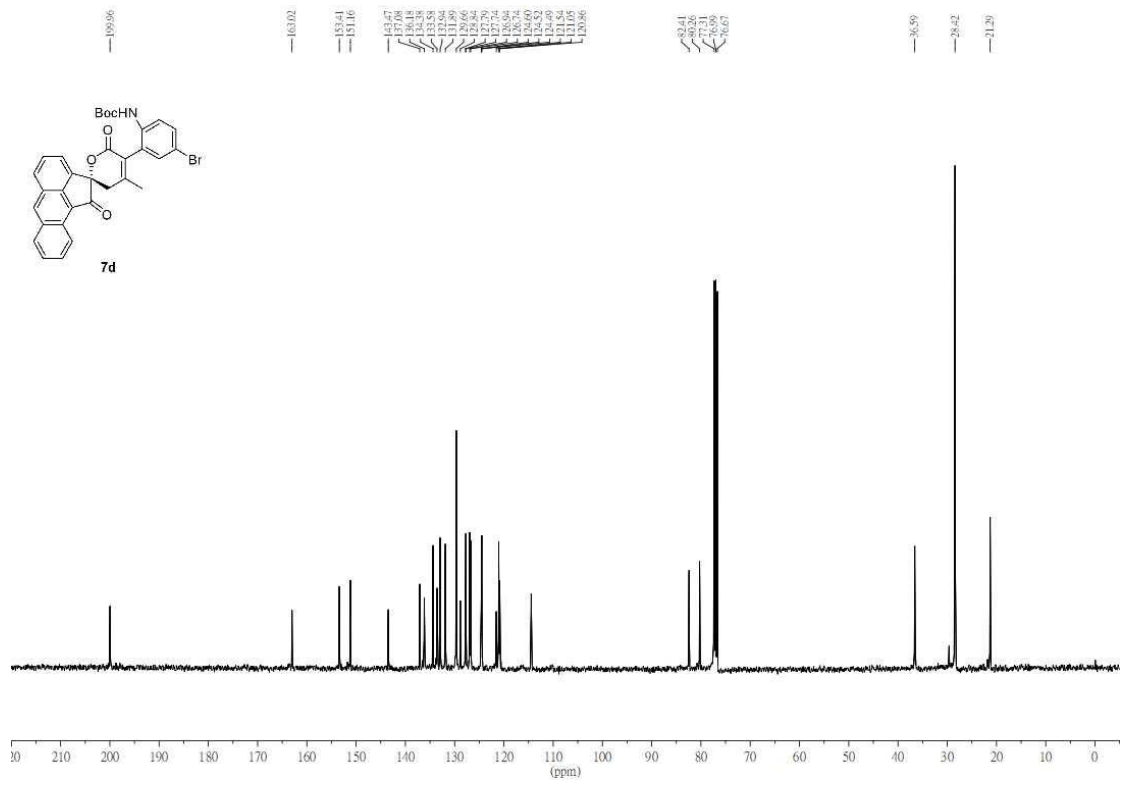

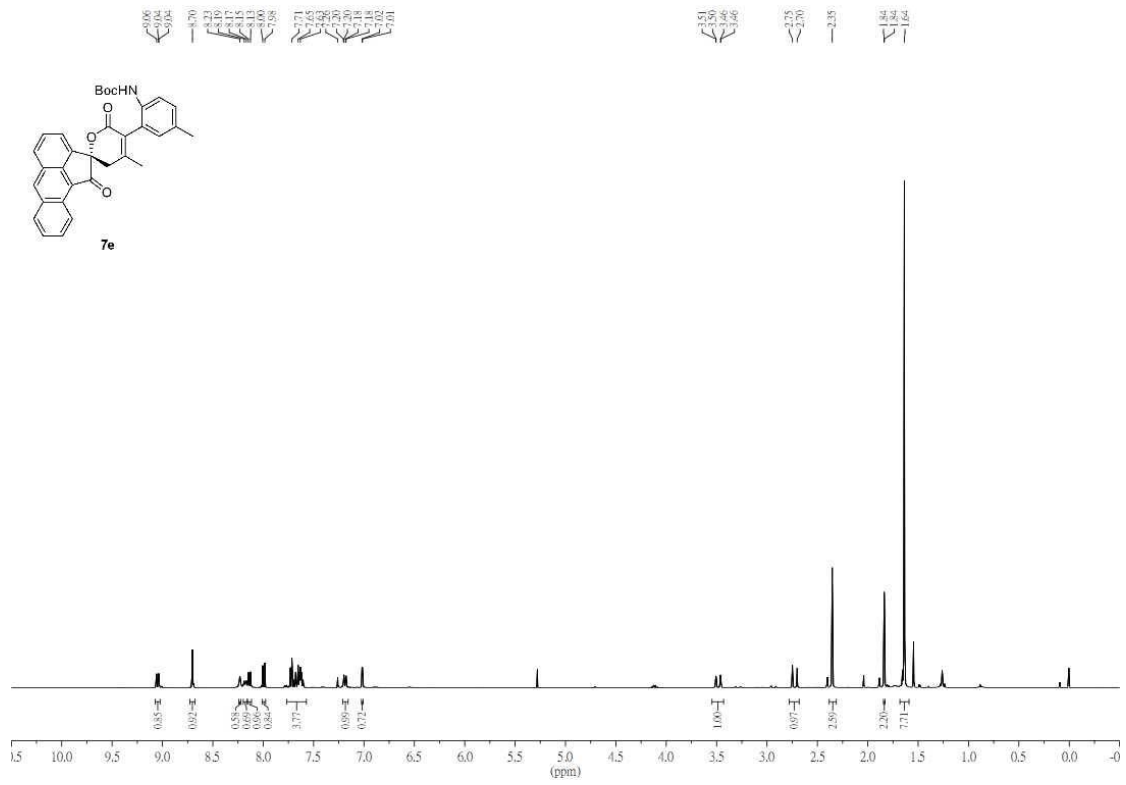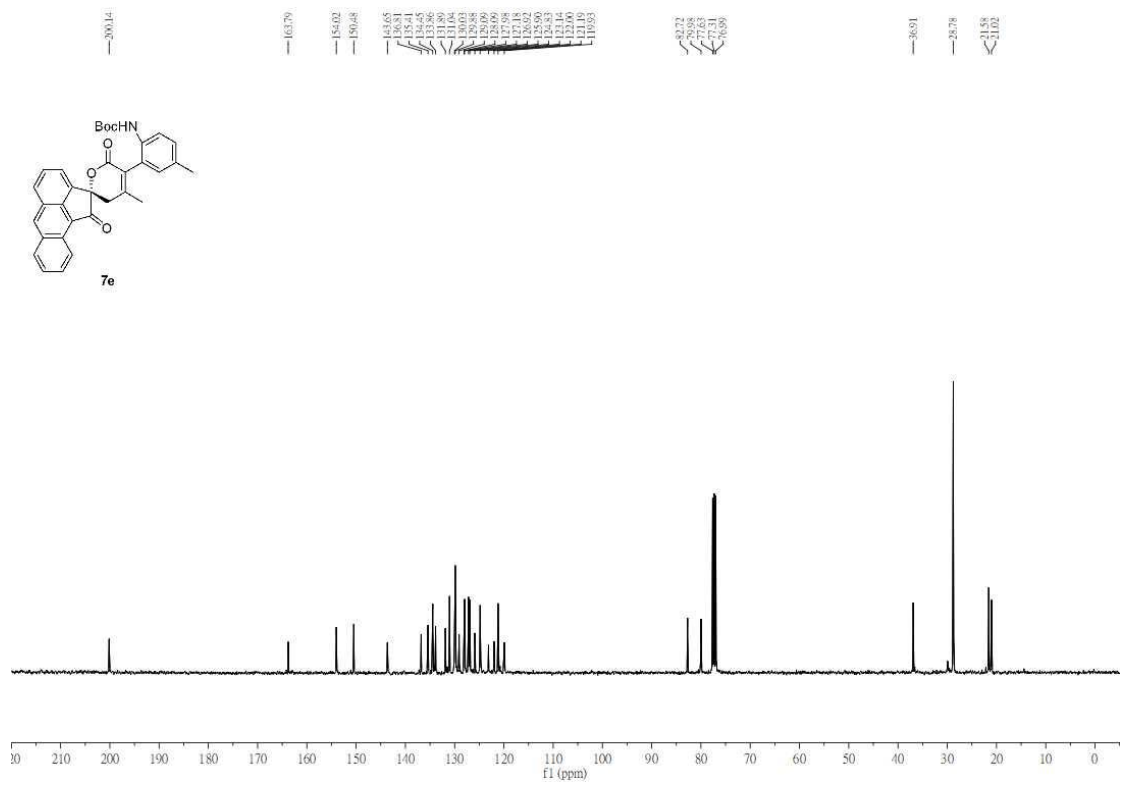

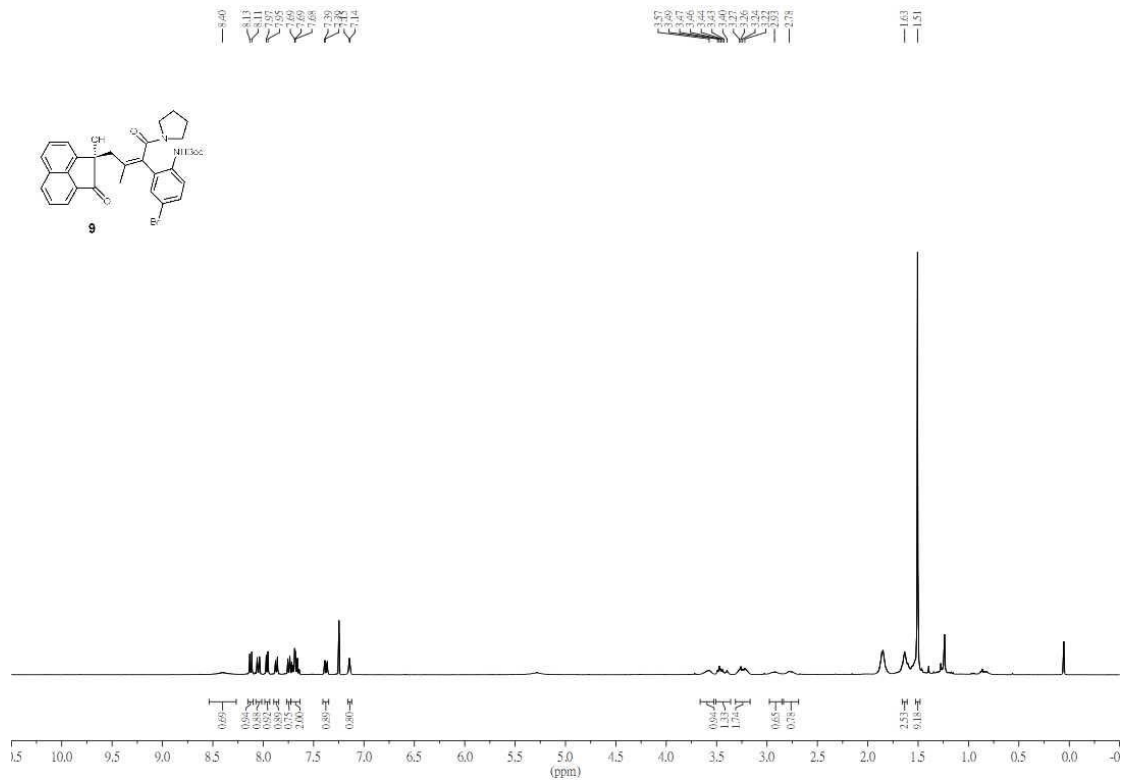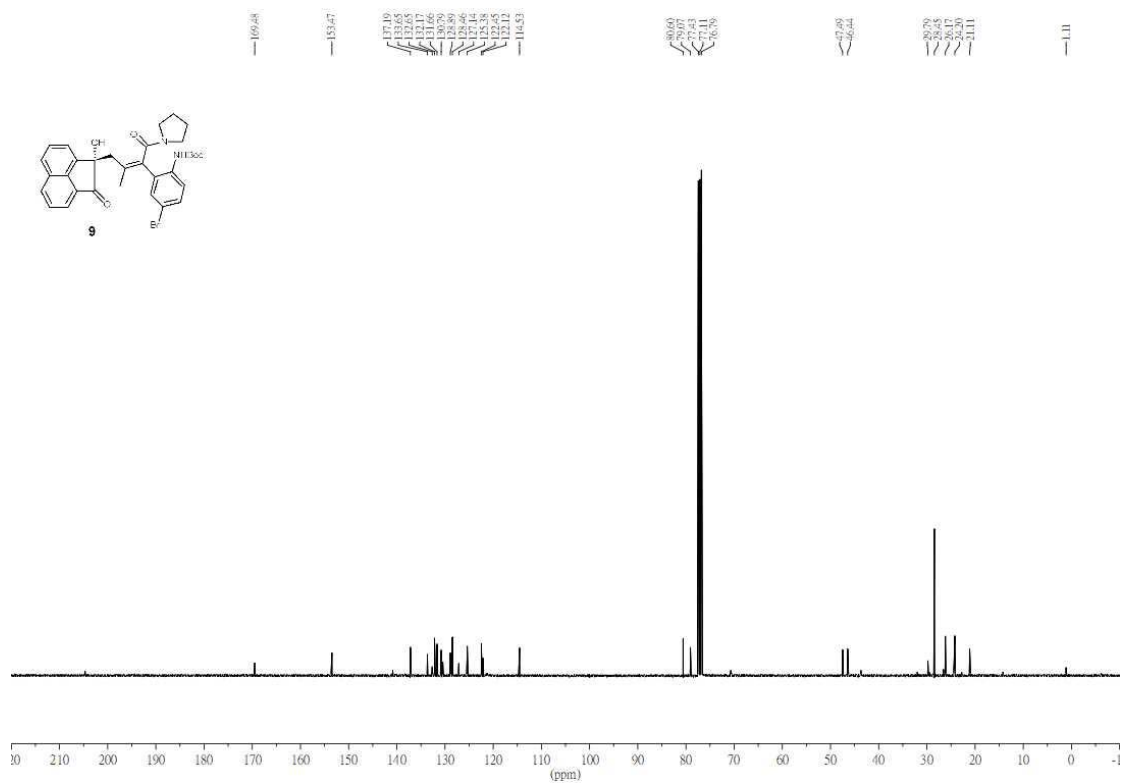

#### 4. Copies of HPLC Spectra of Products 3, 5, 7, and 9

##### 3a

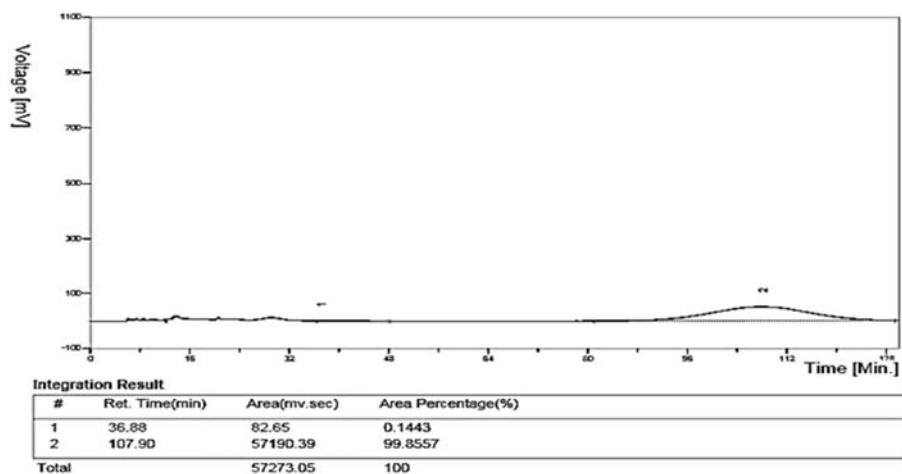

##### ent-3a

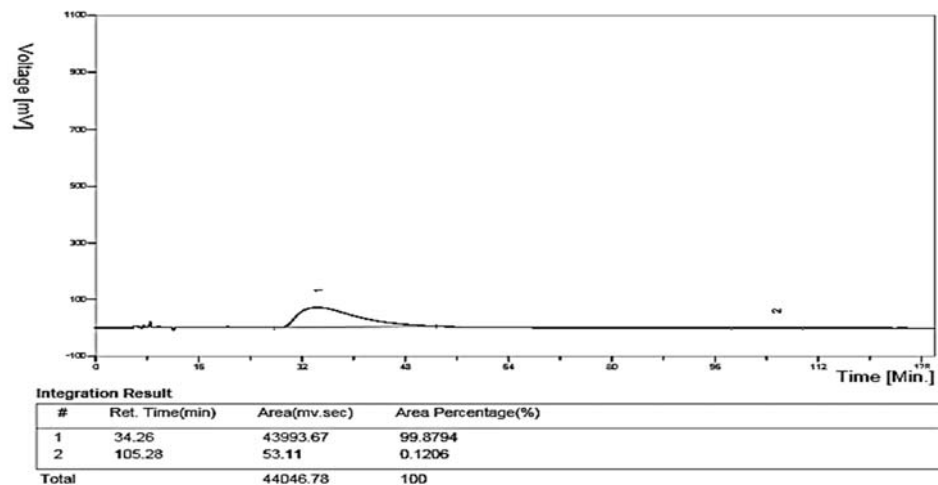

##### 3a + ent-3a as rac-3a

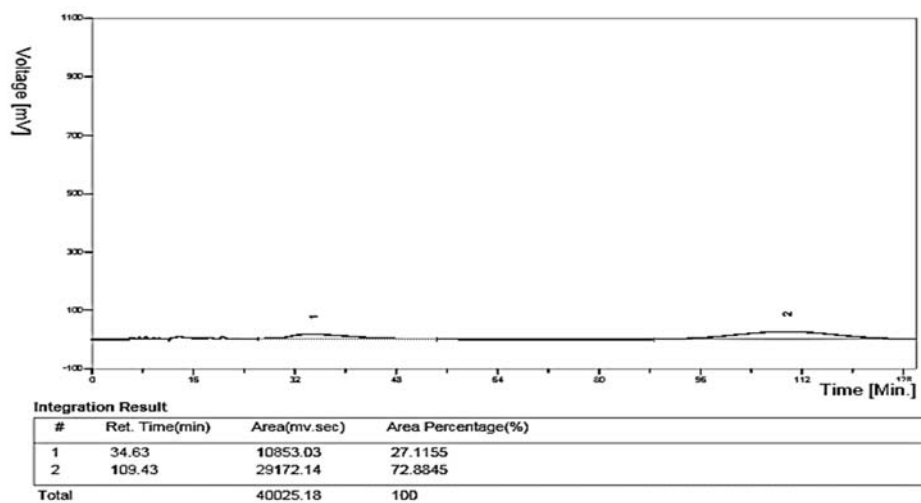

3b

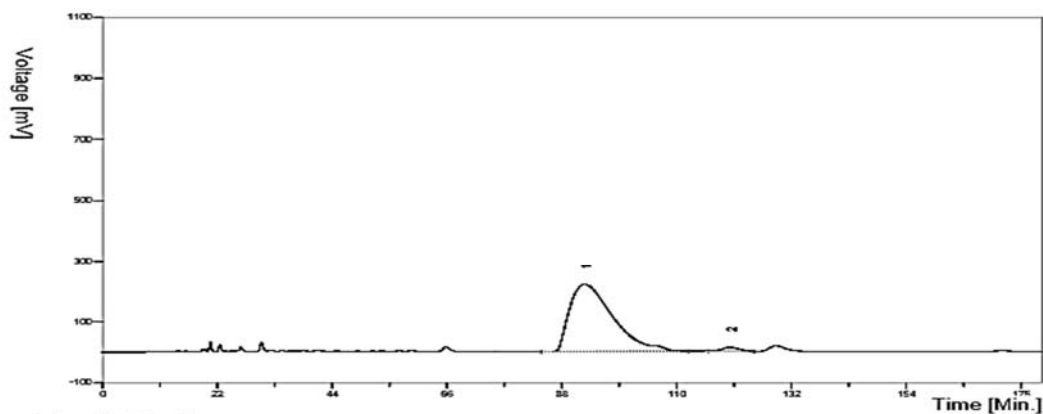

Integration Result

| #     | Ret. Time(min) | Area(mv.sec) | Area Percentage(%) |
|-------|----------------|--------------|--------------------|
| 1     | 92.39          | 126399.06    | 97.9389            |
| 2     | 120.21         | 2659.99      | 2.0611             |
| Total |                | 129059.05    | 100                |

ent-3b

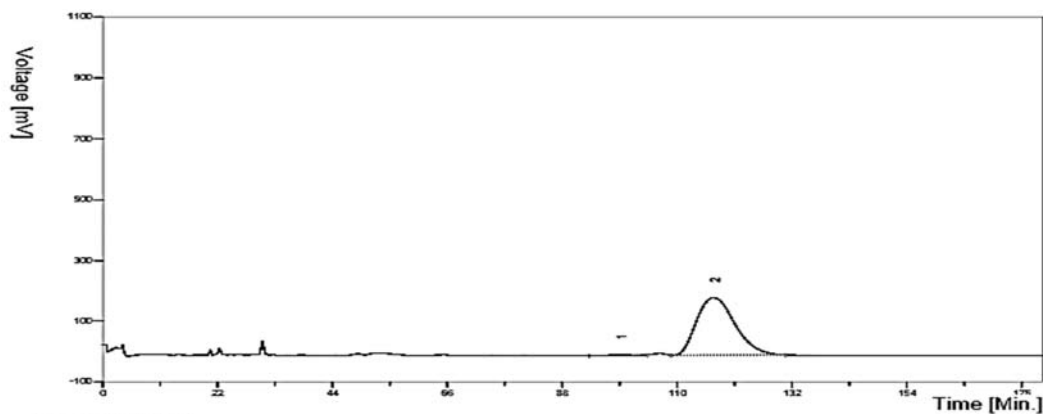

Integration Result

| #     | Ret. Time(min) | Area(mv.sec) | Area Percentage(%) |
|-------|----------------|--------------|--------------------|
| 1     | 98.93          | 281.73       | 0.2939             |
| 2     | 116.97         | 95573.77     | 99.7061            |
| Total |                | 95855.50     | 100                |

3b + ent-3b as rac-3b

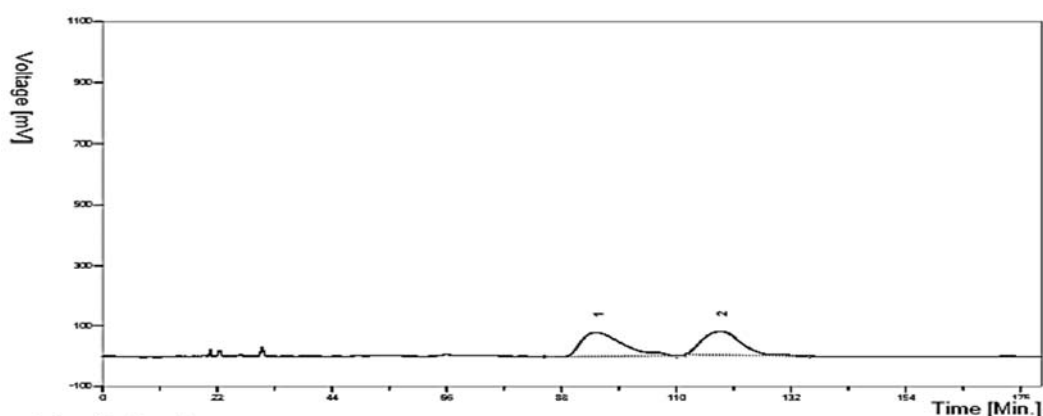

Integration Result

| #     | Ret. Time(min) | Area(mv.sec) | Area Percentage(%) |
|-------|----------------|--------------|--------------------|
| 1     | 94.71          | 42958.30     | 51.3889            |
| 2     | 118.41         | 40636.21     | 48.6111            |
| Total |                | 83594.52     | 100                |

3c

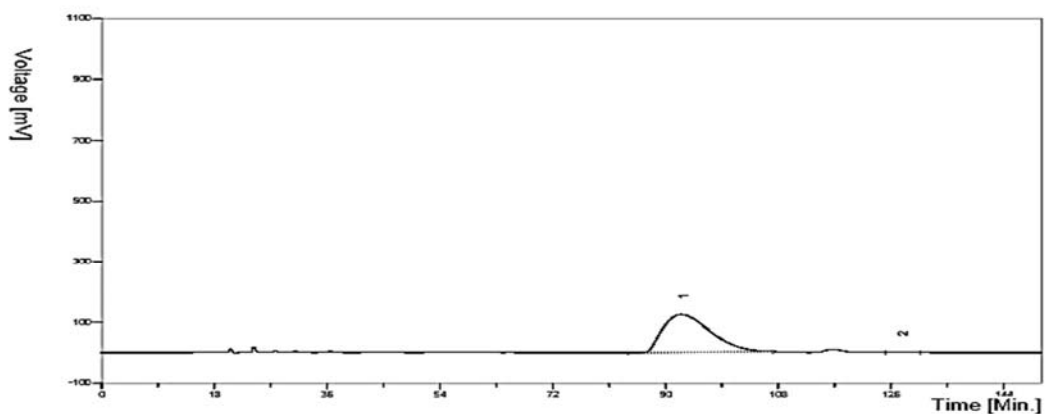

| Integration Result |                |              |                    |
|--------------------|----------------|--------------|--------------------|
| #                  | Ret. Time(min) | Area(mv.sec) | Area Percentage(%) |
| 1                  | 92.56          | 64827.06     | 99.4966            |
| 2                  | 127.56         | 328.01       | 0.5034             |
| Total              |                | 65155.07     | 100                |

ent-3c

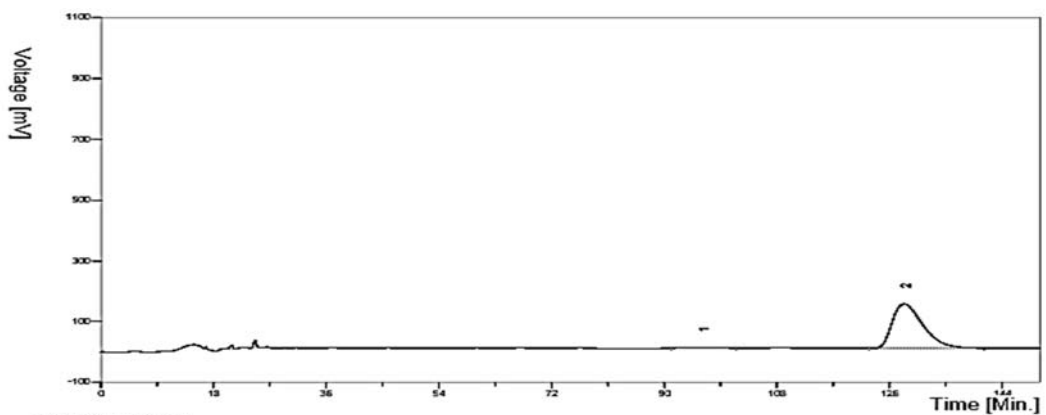

| Integration Result |                |              |                    |
|--------------------|----------------|--------------|--------------------|
| #                  | Ret. Time(min) | Area(mv.sec) | Area Percentage(%) |
| 1                  | 96.06          | 671.71       | 1.3389             |
| 2                  | 128.32         | 49497.97     | 98.6611            |
| Total              |                | 50169.68     | 100                |

3c + ent-3c as rac-3c

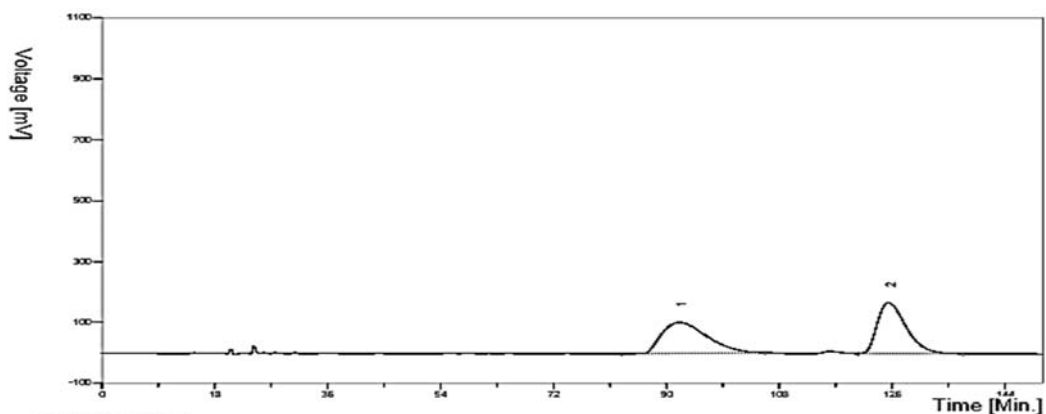

| Integration Result |                |              |                    |
|--------------------|----------------|--------------|--------------------|
| #                  | Ret. Time(min) | Area(mv.sec) | Area Percentage(%) |
| 1                  | 92.09          | 50682.83     | 48.8436            |
| 2                  | 125.49         | 53082.78     | 51.1564            |
| Total              |                | 103765.61    | 100                |



3d

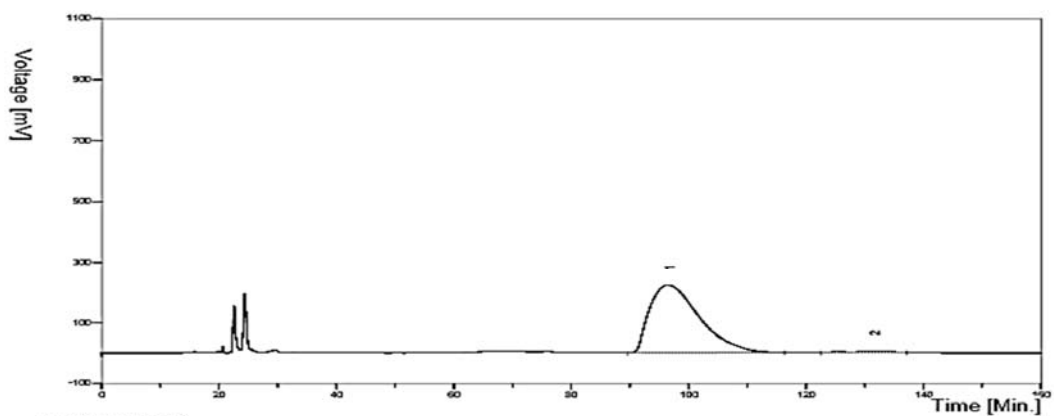

Integration Result

| #     | Ret. Time(min) | Area(mv.sec) | Area Percentage(%) |
|-------|----------------|--------------|--------------------|
| 1     | 96.44          | 131181.99    | 98.3963            |
| 2     | 131.44         | 2138.09      | 1.6037             |
| Total |                | 133320.08    | 100                |

ent-3d

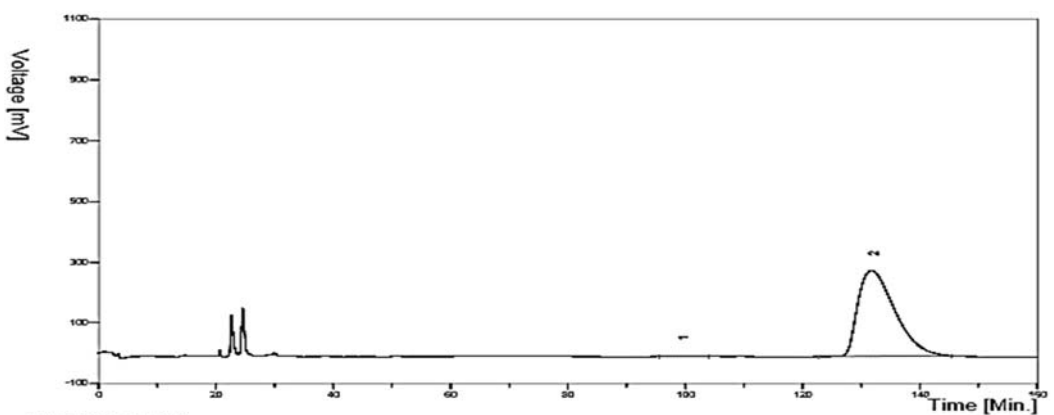

Integration Result

| #     | Ret. Time(min) | Area(mv.sec) | Area Percentage(%) |
|-------|----------------|--------------|--------------------|
| 1     | 99.34          | 420.62       | 0.3409             |
| 2     | 131.77         | 122978.65    | 99.6591            |
| Total |                | 123399.26    | 100                |

3d + ent-3d as rac-3d

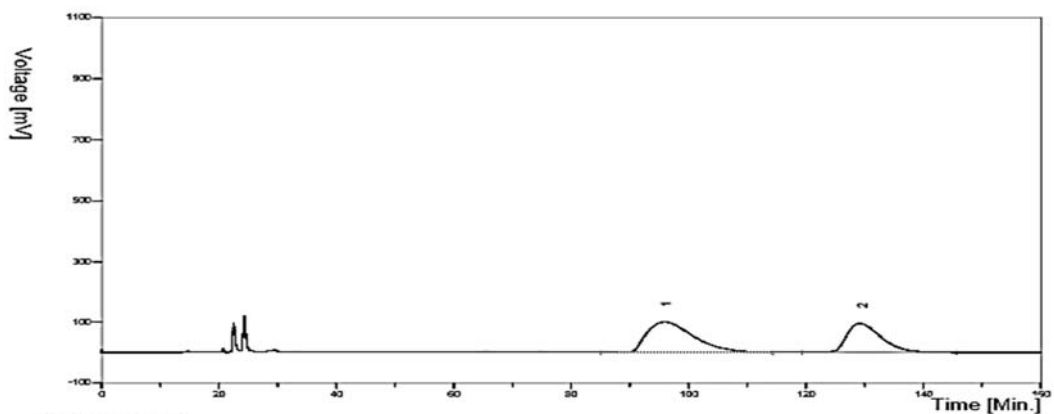

Integration Result

| #     | Ret. Time(min) | Area(mv.sec) | Area Percentage(%) |
|-------|----------------|--------------|--------------------|
| 1     | 95.85          | 54609.33     | 58.6591            |
| 2     | 129.26         | 38486.79     | 41.3409            |
| Total |                | 93096.13     | 100                |

3e

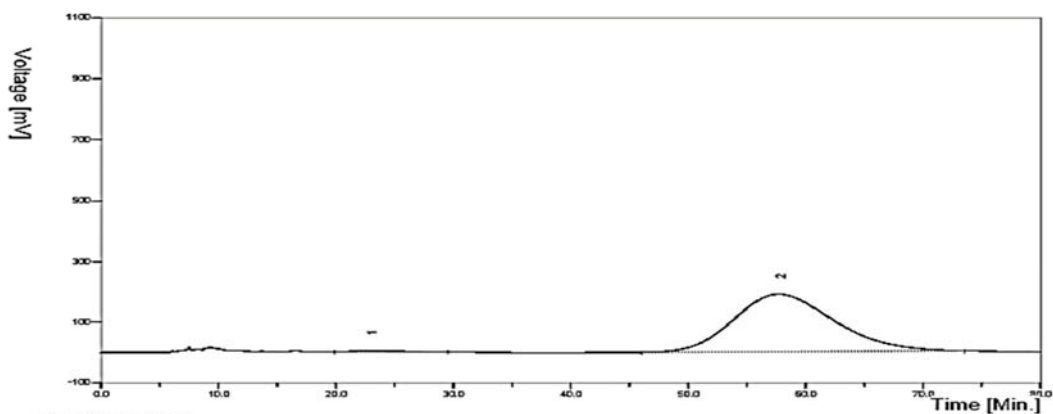

| Integration Result |                |              |                    |
|--------------------|----------------|--------------|--------------------|
| #                  | Ret. Time(min) | Area(mv.sec) | Area Percentage(%) |
| 1                  | 22.91          | 1006.99      | 0.8903             |
| 2                  | 57.70          | 112099.25    | 99.1097            |
| Total              |                | 113106.24    | 100                |

ent-3e

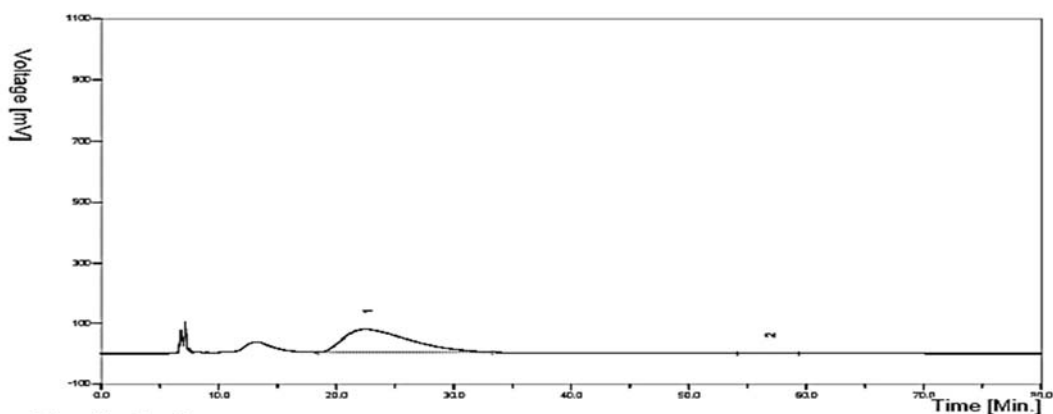

| Integration Result |                |              |                    |
|--------------------|----------------|--------------|--------------------|
| #                  | Ret. Time(min) | Area(mv.sec) | Area Percentage(%) |
| 1                  | 22.53          | 29180.28     | 99.7736            |
| 2                  | 56.79          | 66.21        | 0.2264             |
| Total              |                | 29246.48     | 100                |

3e + ent-3e as rac-3e

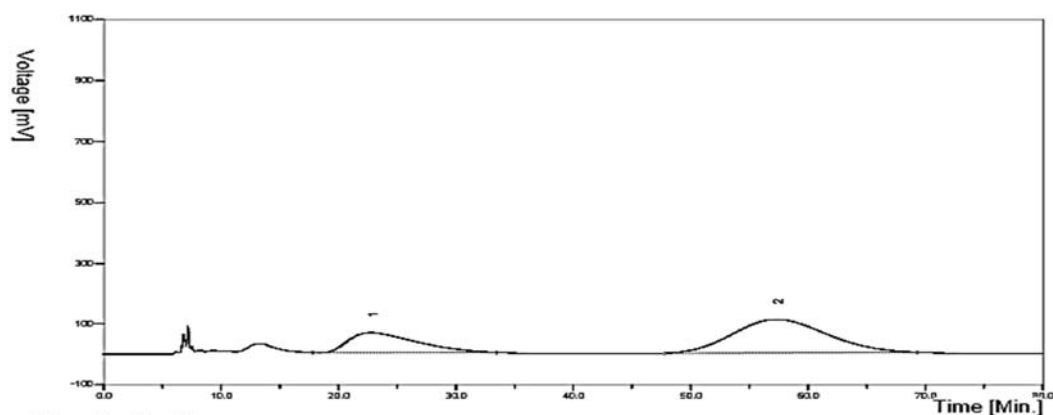

| Integration Result |                |              |                    |
|--------------------|----------------|--------------|--------------------|
| #                  | Ret. Time(min) | Area(mv.sec) | Area Percentage(%) |
| 1                  | 22.79          | 25920.35     | 29.8296            |
| 2                  | 57.29          | 60974.30     | 70.1704            |
| Total              |                | 86894.65     | 100                |

3f

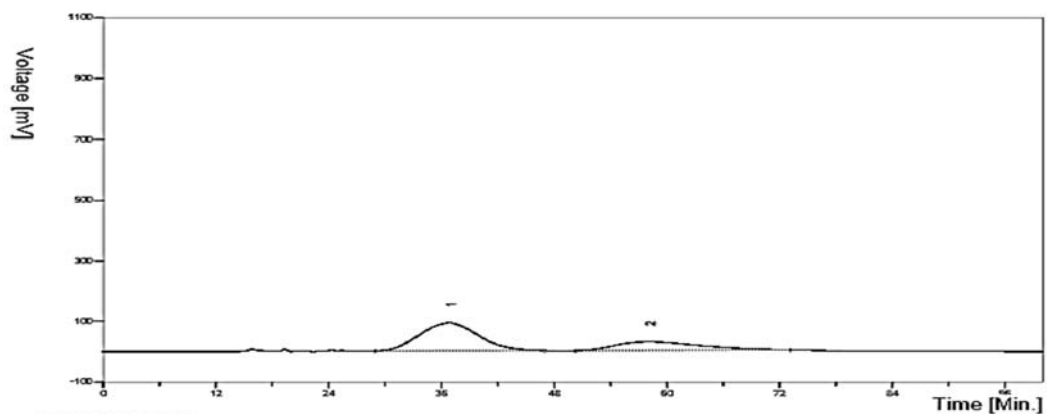

Integration Result

| #     | Ret. Time(min) | Area(mv.sec) | Area Percentage(%) |
|-------|----------------|--------------|--------------------|
| 1     | 36.86          | 39447.07     | 69.1205            |
| 2     | 58.08          | 17622.89     | 30.8795            |
| Total |                | 57069.96     | 100                |

ent-3f

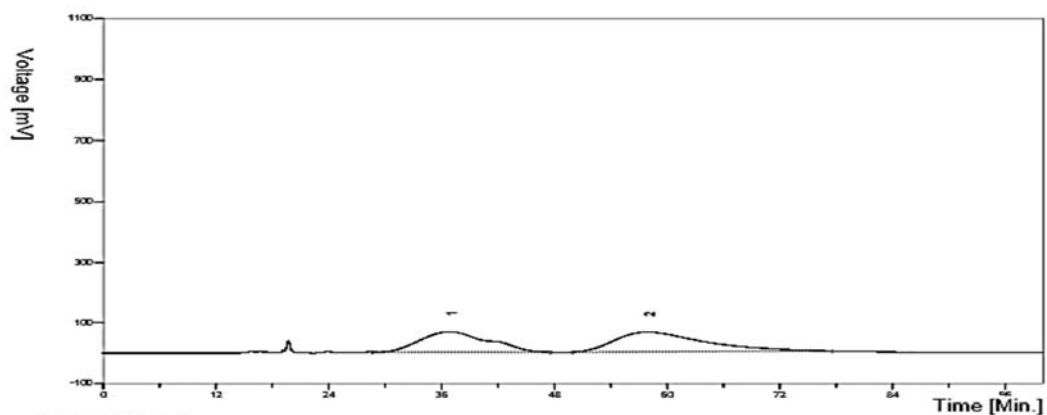

Integration Result

| #     | Ret. Time(min) | Area(mv.sec) | Area Percentage(%) |
|-------|----------------|--------------|--------------------|
| 1     | 36.87          | 33265.73     | 43.8011            |
| 2     | 57.94          | 42681.53     | 56.1989            |
| Total |                | 75947.26     | 100                |

3f + ent-3f as rac-3f

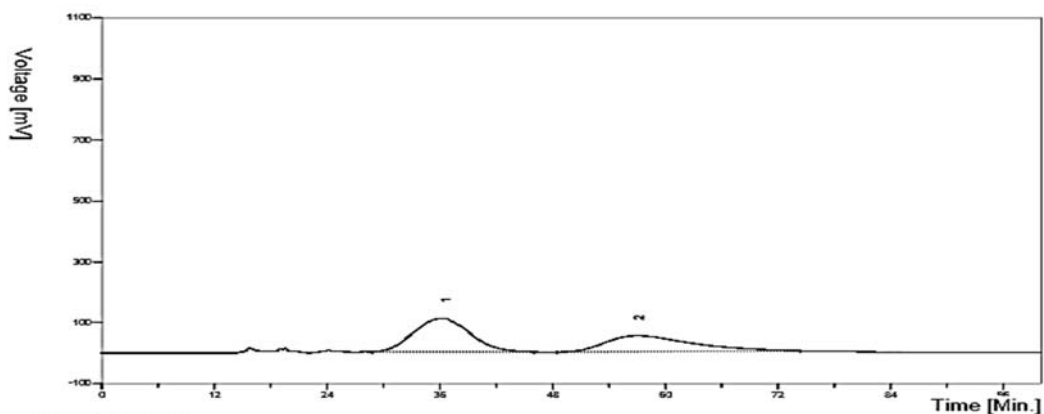

Integration Result

| #     | Ret. Time(min) | Area(mv.sec) | Area Percentage(%) |
|-------|----------------|--------------|--------------------|
| 1     | 36.46          | 45222.75     | 57.7838            |
| 2     | 57.00          | 33039.24     | 42.2162            |
| Total |                | 78261.99     | 100                |

3g

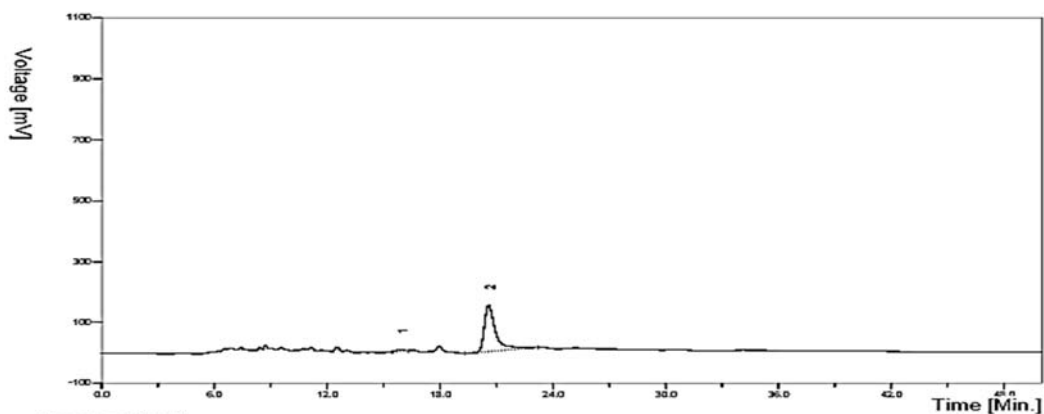

Integration Result

| #     | Ret. Time(min) | Area(mv.sec) | Area Percentage(%) |
|-------|----------------|--------------|--------------------|
| 1     | 15.92          | 151.26       | 2.4643             |
| 2     | 20.58          | 5986.88      | 97.5357            |
| Total |                | 6138.14      | 100                |

ent-3g

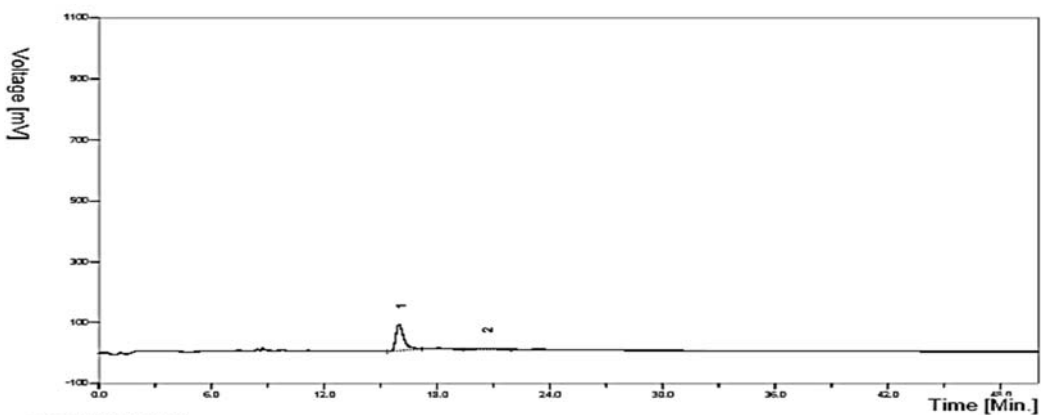

Integration Result

| #     | Ret. Time(min) | Area(mv.sec) | Area Percentage(%) |
|-------|----------------|--------------|--------------------|
| 1     | 15.98          | 2486.66      | 93.8358            |
| 2     | 20.59          | 163.35       | 6.1642             |
| Total |                | 2650.01      | 100                |

3g + ent-3g as rac-3g

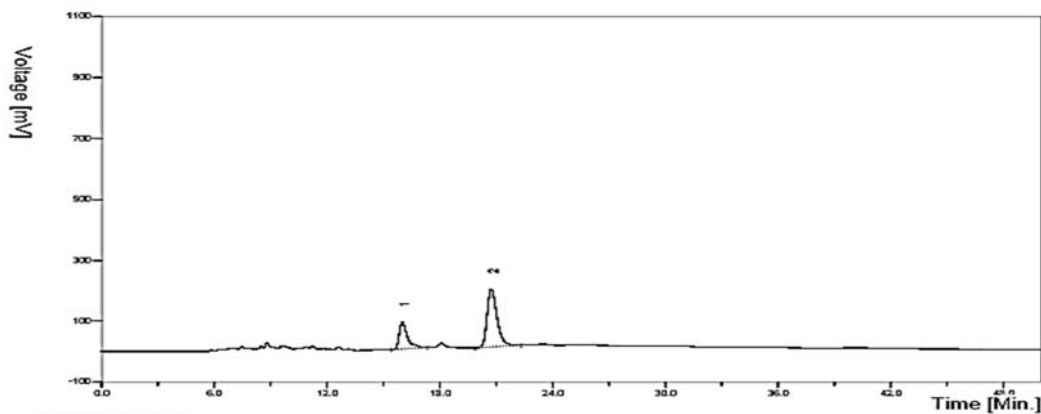

Integration Result

| #     | Ret. Time(min) | Area(mv.sec) | Area Percentage(%) |
|-------|----------------|--------------|--------------------|
| 1     | 16.01          | 2644.06      | 27.6505            |
| 2     | 20.74          | 6918.35      | 72.3495            |
| Total |                | 9562.40      | 100                |

3h

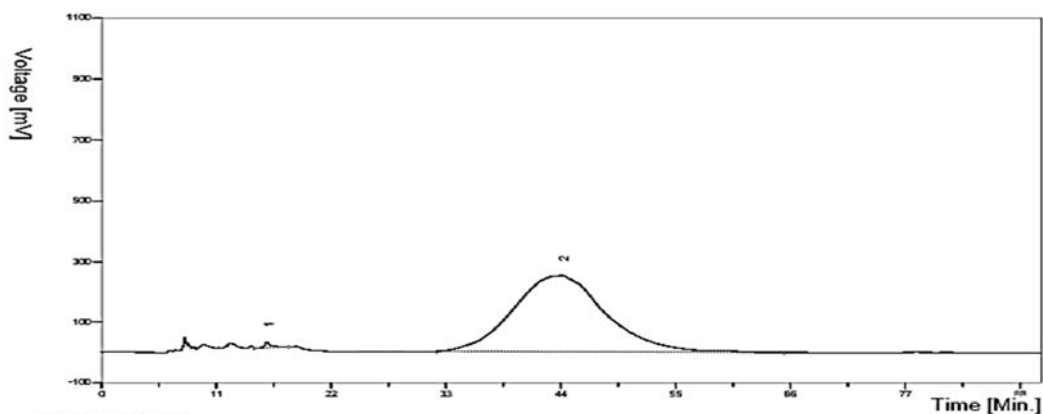

Integration Result

| #     | Ret. Time(min) | Area(mv.sec) | Area Percentage(%) |
|-------|----------------|--------------|--------------------|
| 1     | 15.85          | 611.00       | 0.3952             |
| 2     | 44.11          | 153989.31    | 99.6048            |
| Total |                | 154600.31    | 100                |

ent-3h

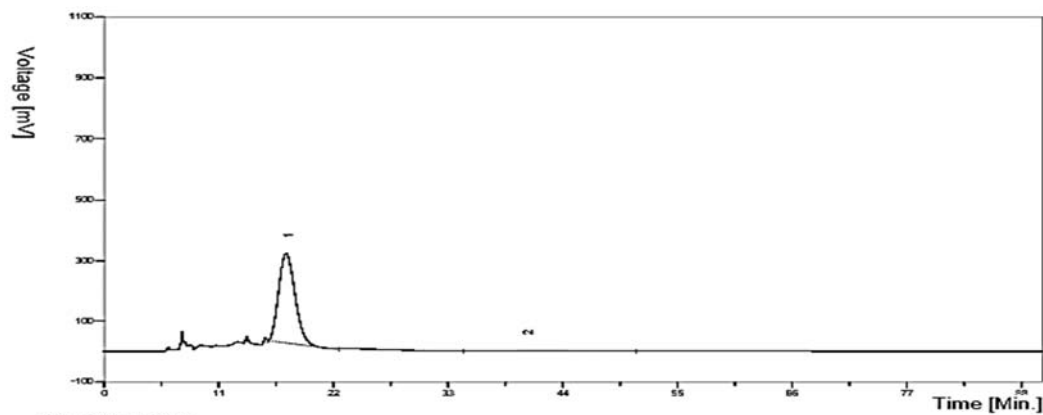

Integration Result

| #     | Ret. Time(min) | Area(mv.sec) | Area Percentage(%) |
|-------|----------------|--------------|--------------------|
| 1     | 17.46          | 31751.05     | 97.4607            |
| 2     | 40.50          | 827.28       | 2.5393             |
| Total |                | 32578.32     | 100                |

3h + ent-3h as rac-3h

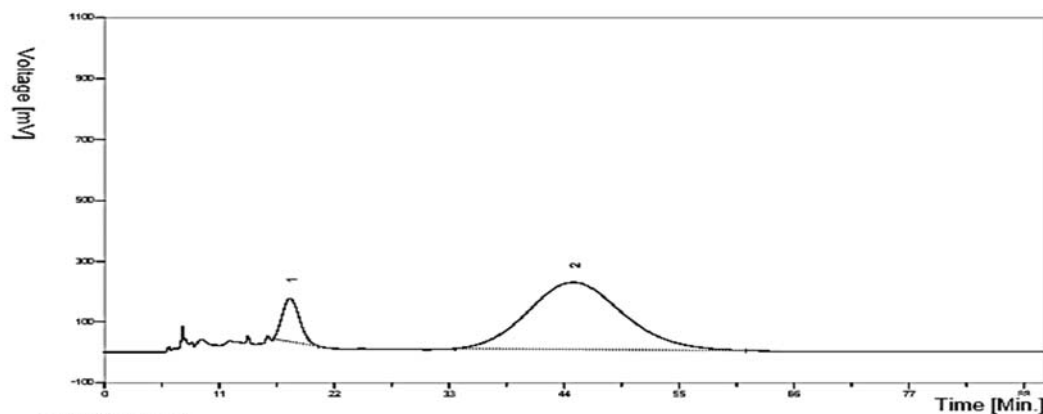

Integration Result

| #     | Ret. Time(min) | Area(mv.sec) | Area Percentage(%) |
|-------|----------------|--------------|--------------------|
| 1     | 17.76          | 16231.58     | 10.4396            |
| 2     | 44.87          | 139248.85    | 89.5604            |
| Total |                | 155480.44    | 100                |

3i

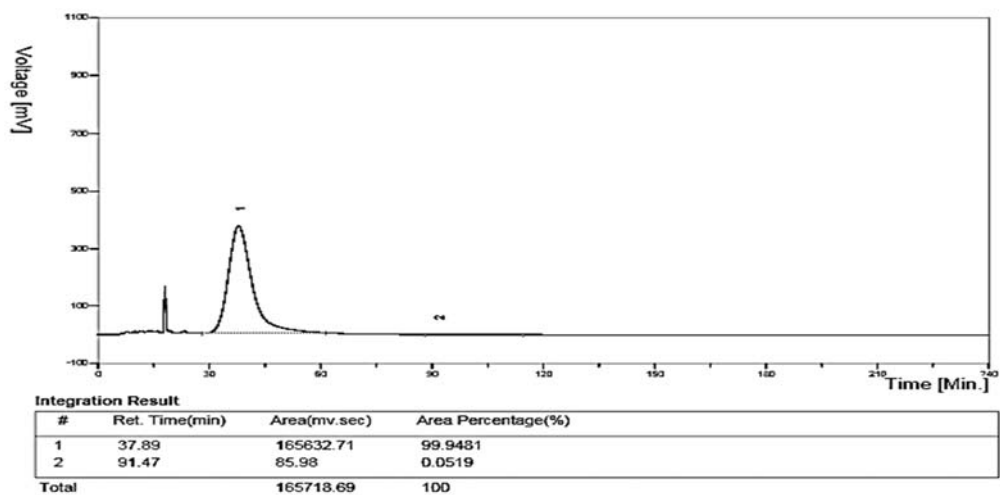

ent-3i

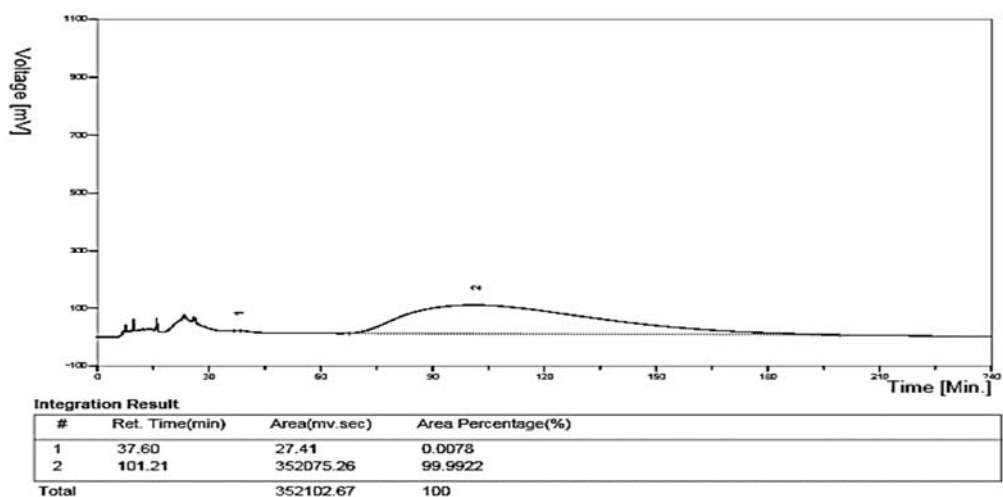

3i + ent-3i as rac-3i

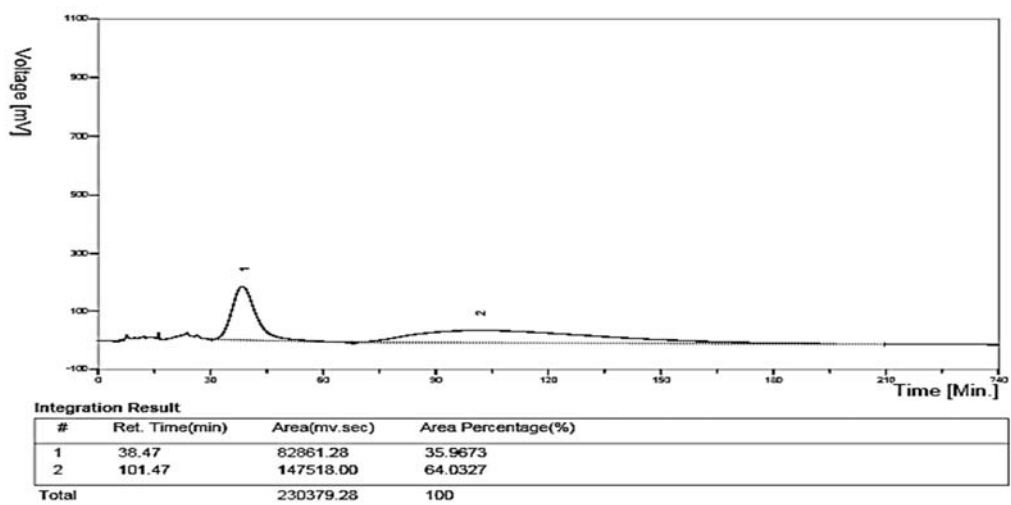

3j

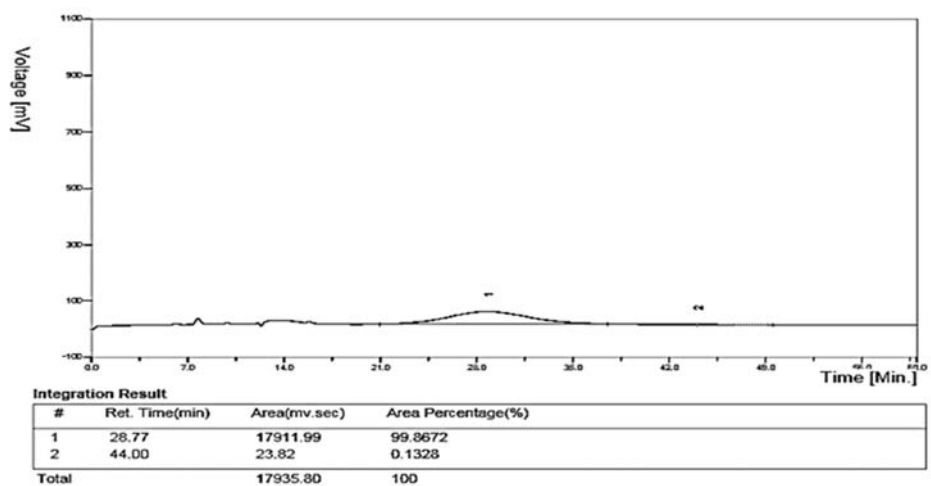

ent-3j

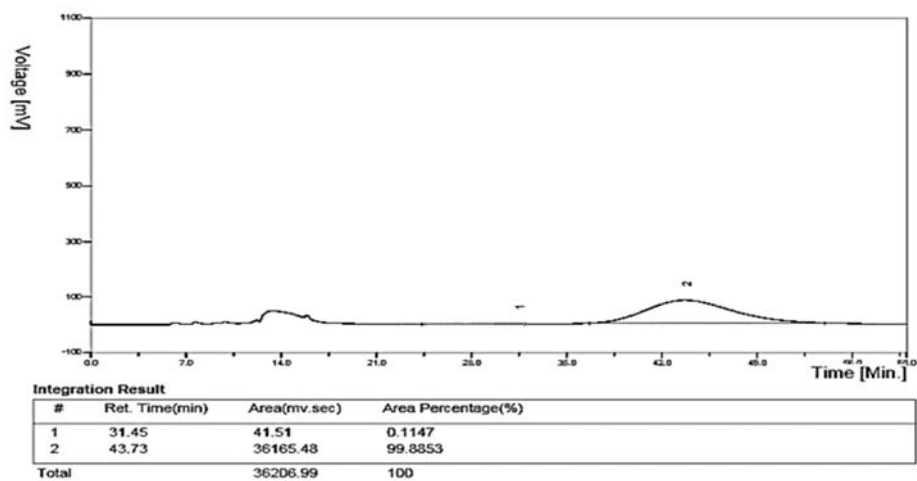

3j + ent-3j as rac-3j

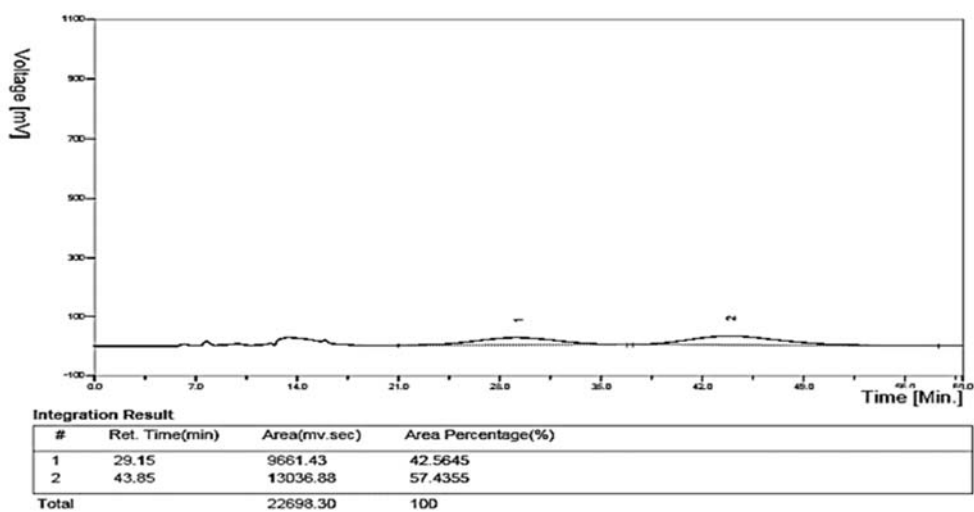

5a

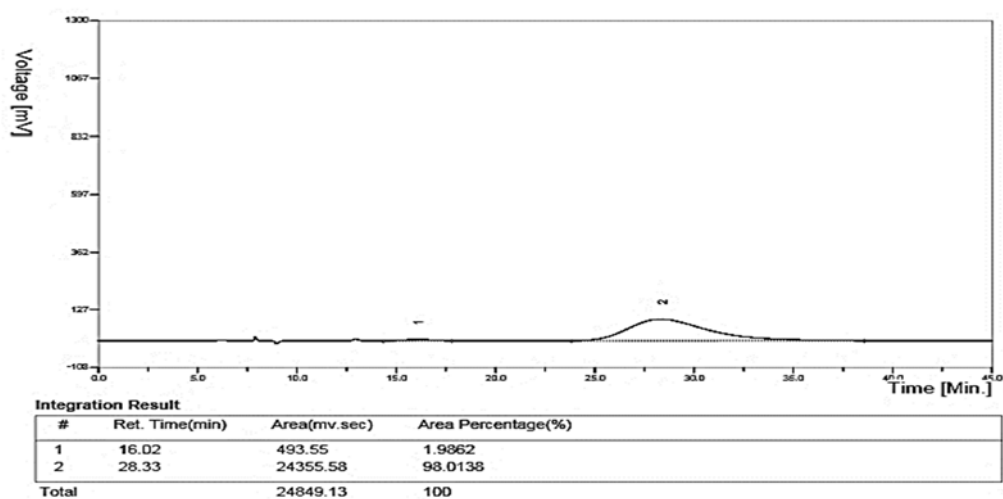

ent-5a

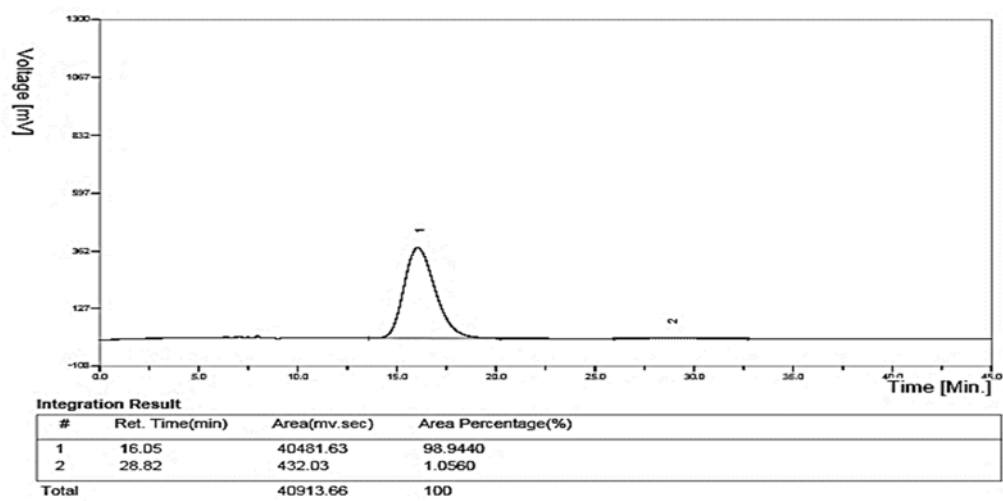

5a + ent-5a as rac-5a

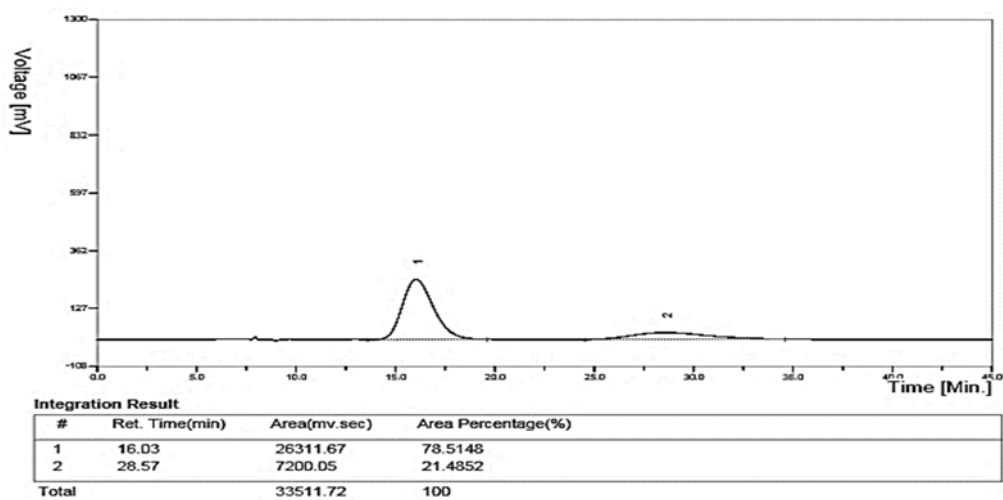



5b

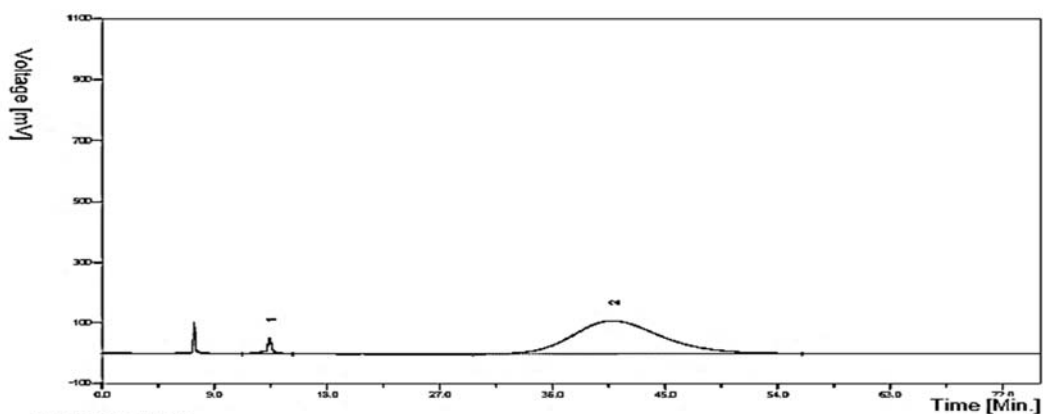

| Integration Result |                |              |                    |
|--------------------|----------------|--------------|--------------------|
| #                  | Ret. Time(min) | Area(mv.sec) | Area Percentage(%) |
| 1                  | 13.41          | 1574.23      | 2.8151             |
| 2                  | 40.80          | 54347.03     | 97.1849            |
| Total              |                | 55921.26     | 100                |

ent-5b

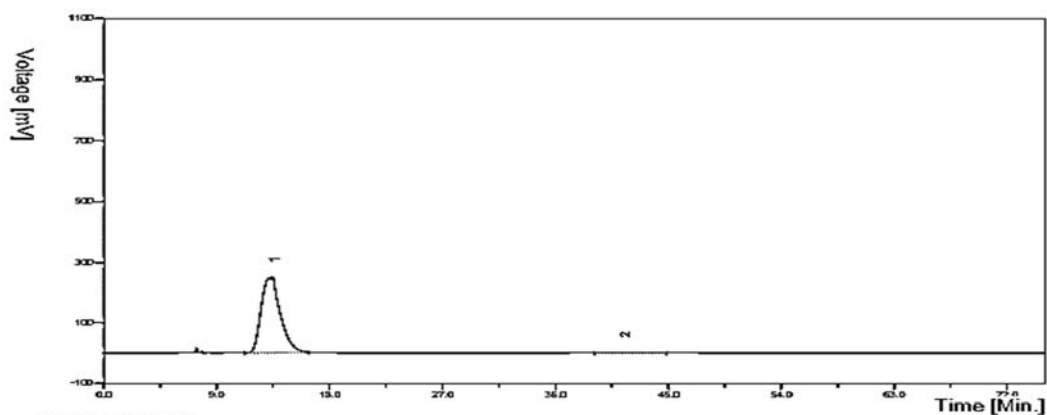

| Integration Result |                |              |                    |
|--------------------|----------------|--------------|--------------------|
| #                  | Ret. Time(min) | Area(mv.sec) | Area Percentage(%) |
| 1                  | 13.45          | 26219.41     | 99.7747            |
| 2                  | 41.39          | 59.19        | 0.2253             |
| Total              |                | 26278.61     | 100                |

5b + ent-5b as rac-5b

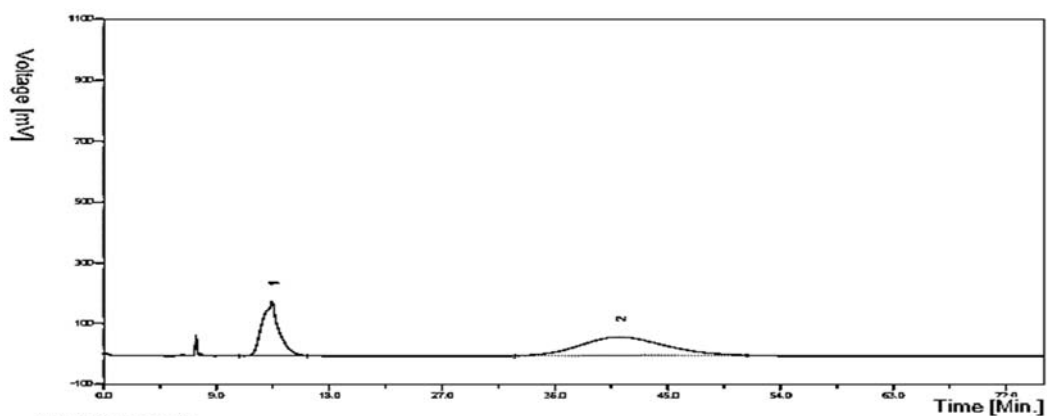

| Integration Result |                |              |                    |
|--------------------|----------------|--------------|--------------------|
| #                  | Ret. Time(min) | Area(mv.sec) | Area Percentage(%) |
| 1                  | 13.45          | 16282.21     | 36.4311            |
| 2                  | 41.12          | 28410.89     | 63.5689            |
| Total              |                | 44693.10     | 100                |

5c

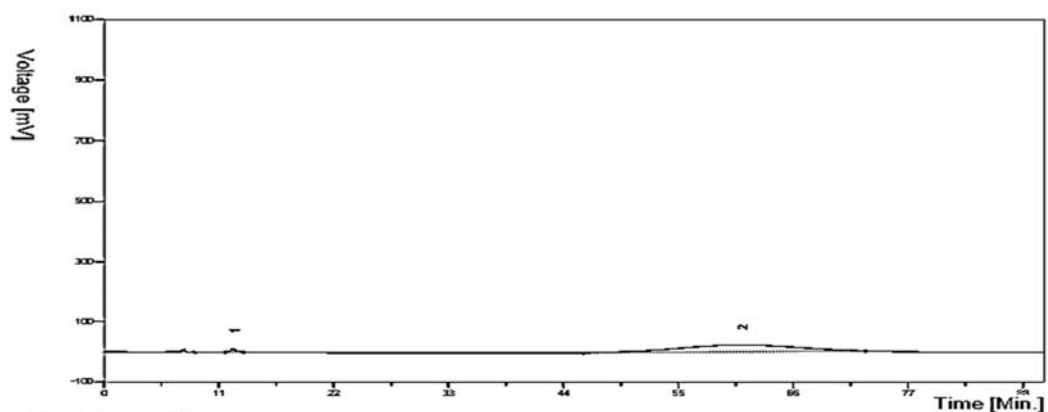

**Integration Result**

| #            | Ret. Time(min) | Area(mv.sec)    | Area Percentage(%) |
|--------------|----------------|-----------------|--------------------|
| 1            | 12.35          | 347.30          | 1.9427             |
| 2            | 60.99          | 17530.08        | 98.0573            |
| <b>Total</b> |                | <b>17877.38</b> | <b>100</b>         |

ent-5c

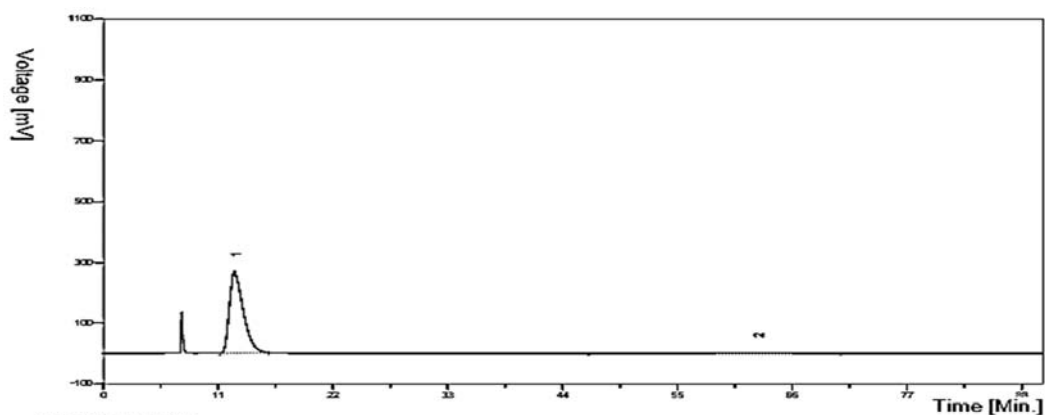

**Integration Result**

| #            | Ret. Time(min) | Area(mv.sec)    | Area Percentage(%) |
|--------------|----------------|-----------------|--------------------|
| 1            | 12.54          | 24456.01        | 98.9726            |
| 2            | 62.59          | 253.86          | 1.0274             |
| <b>Total</b> |                | <b>24709.88</b> | <b>100</b>         |

5c + ent-5c as rac-5c

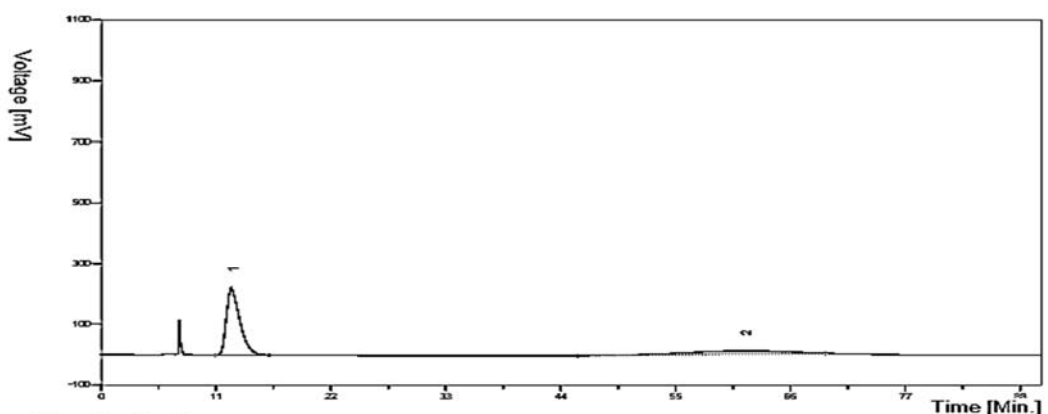

**Integration Result**

| #            | Ret. Time(min) | Area(mv.sec)    | Area Percentage(%) |
|--------------|----------------|-----------------|--------------------|
| 1            | 12.44          | 19422.09        | 74.8564            |
| 2            | 61.57          | 6523.71         | 25.1436            |
| <b>Total</b> |                | <b>25945.79</b> | <b>100</b>         |

5d

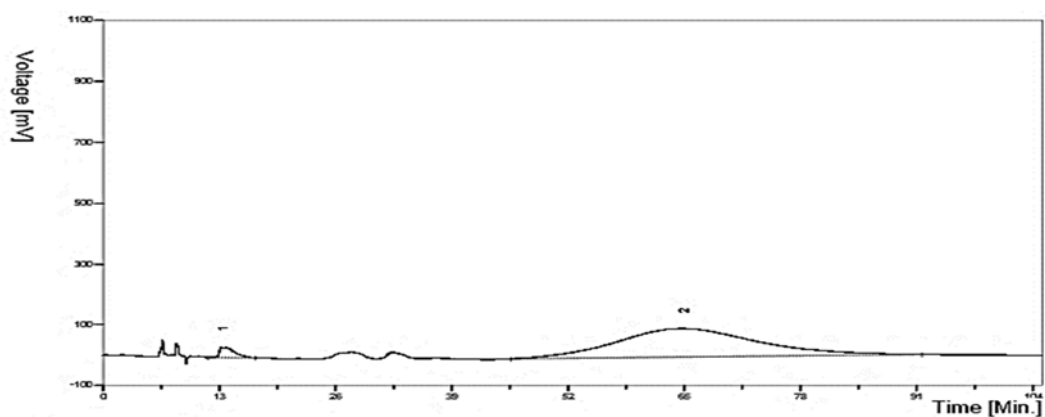

Integration Result

| #     | Ret. Time(min) | Area(mv.sec) | Area Percentage(%) |
|-------|----------------|--------------|--------------------|
| 1     | 13.18          | 3855.33      | 3.6185             |
| 2     | 64.72          | 102689.15    | 96.3815            |
| Total |                | 106544.48    | 100                |

ent-5d

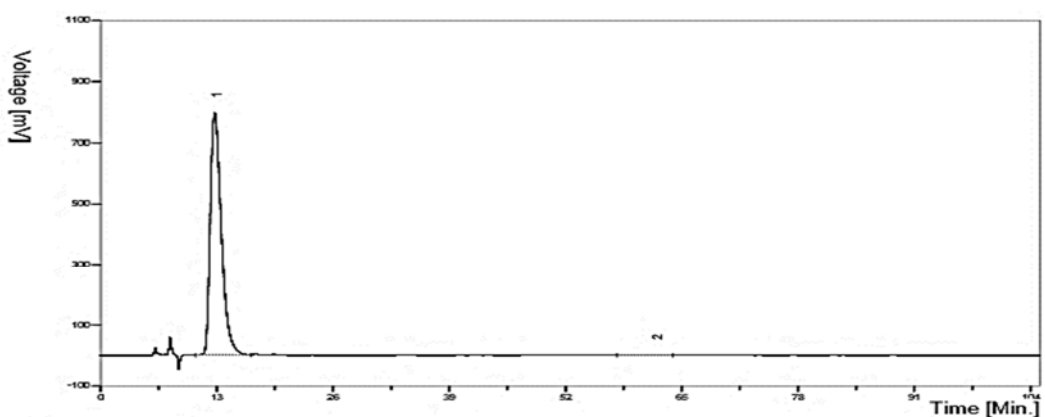

Integration Result

| #     | Ret. Time(min) | Area(mv.sec) | Area Percentage(%) |
|-------|----------------|--------------|--------------------|
| 1     | 12.77          | 68411.24     | 99.9047            |
| 2     | 62.06          | 65.27        | 0.0953             |
| Total |                | 68476.52     | 100                |

5d + ent-5d as rac-5d

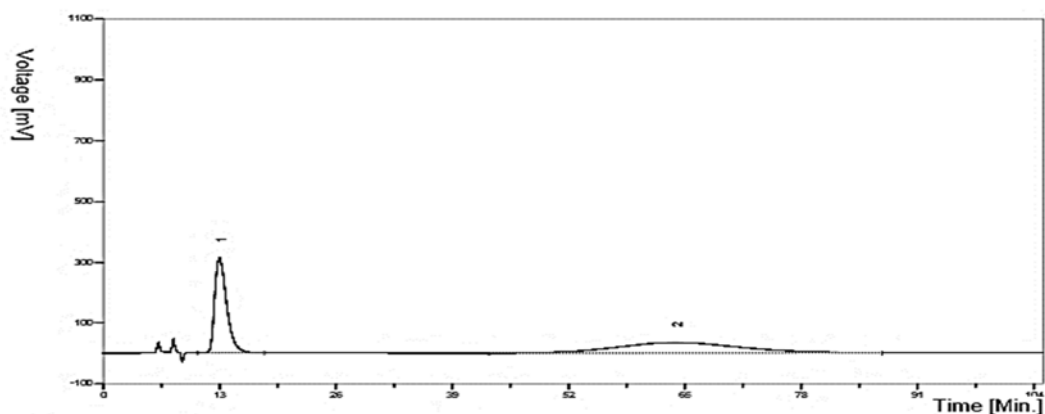

Integration Result

| #     | Ret. Time(min) | Area(mv.sec) | Area Percentage(%) |
|-------|----------------|--------------|--------------------|
| 1     | 12.97          | 29037.86     | 46.4210            |
| 2     | 63.92          | 33515.38     | 53.5790            |
| Total |                | 62553.24     | 100                |

5e

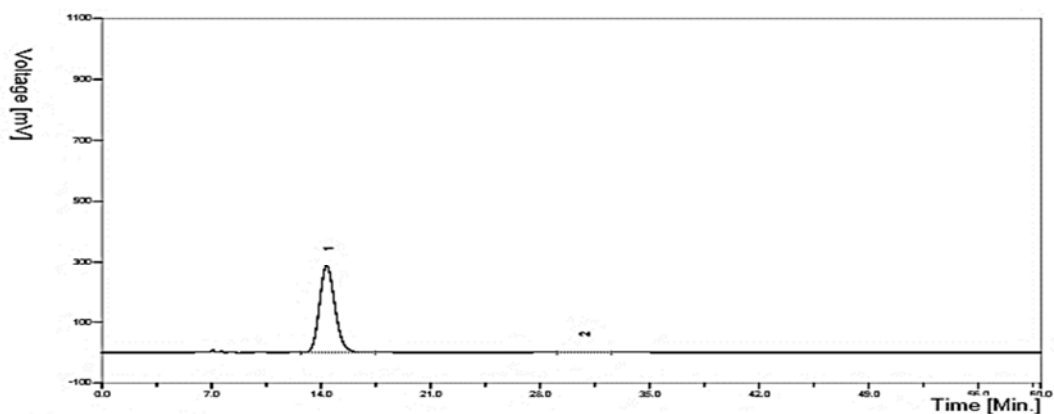

Integration Result

| # | Ret. Time(min) | Area Percentage(%) |
|---|----------------|--------------------|
| 1 | 14.37          | 99.8378            |
| 2 | 30.72          | 0.1622             |

Total 100

ent-5e

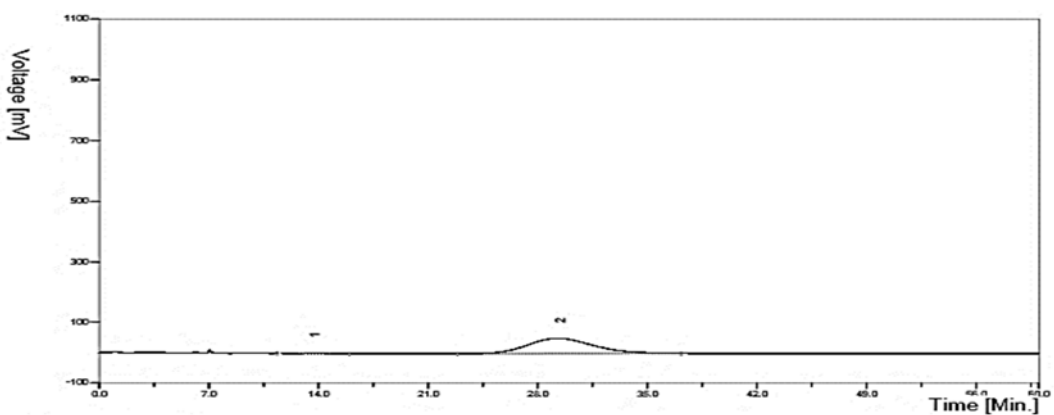

Integration Result

| # | Ret. Time(min) | Area Percentage(%) |
|---|----------------|--------------------|
| 1 | 13.63          | 0.4790             |
| 2 | 29.31          | 99.5210            |

Total 100

5e + ent-5e as rac-5e

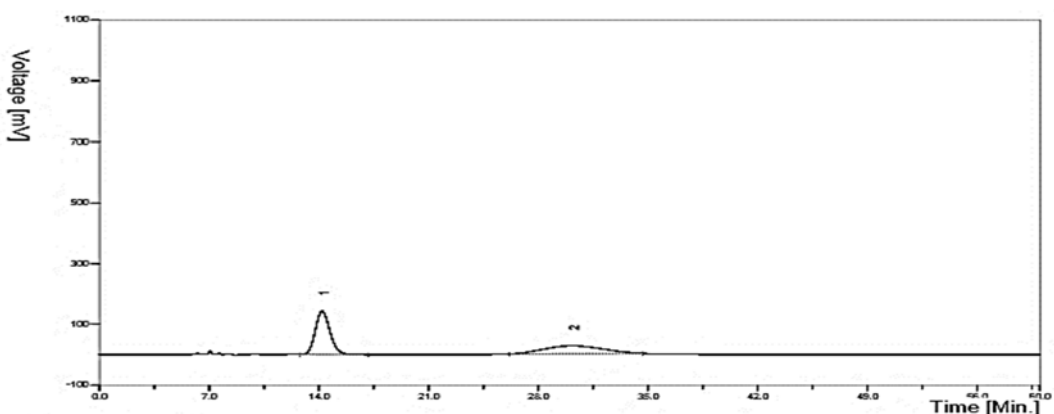

Integration Result

| # | Ret. Time(min) | Area Percentage(%) |
|---|----------------|--------------------|
| 1 | 14.21          | 57.7961            |
| 2 | 30.15          | 42.2039            |

Total 100

7a

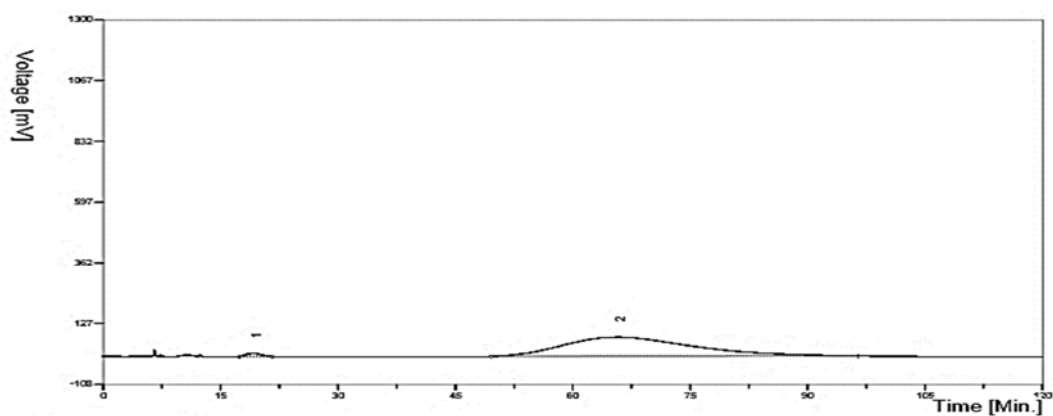

Integration Result

| #     | Ret. Time(min) | Area(mv.sec) | Area Percentage(%) |
|-------|----------------|--------------|--------------------|
| 1     | 19.32          | 1610.73      | 1.8863             |
| 2     | 65.84          | 83780.18     | 98.1137            |
| Total |                | 85390.91     | 100                |

ent-7a

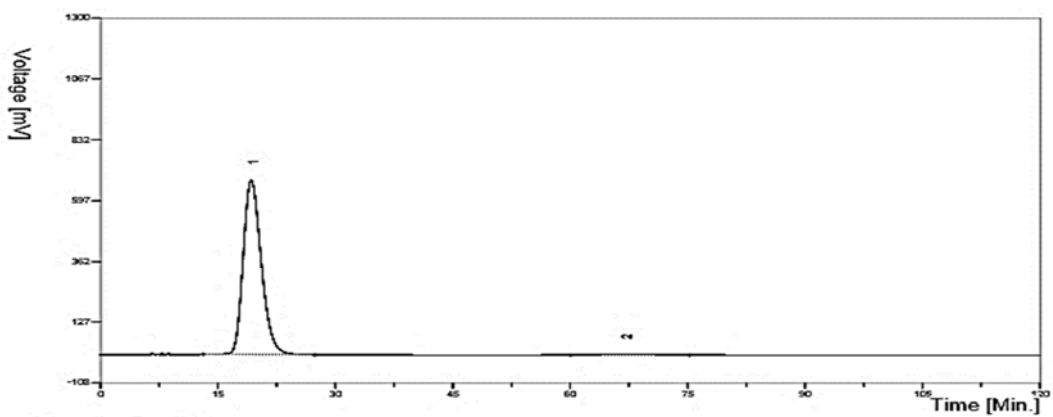

Integration Result

| #     | Ret. Time(min) | Area(mv.sec) | Area Percentage(%) |
|-------|----------------|--------------|--------------------|
| 1     | 19.26          | 108276.60    | 99.4288            |
| 2     | 66.97          | 622.08       | 0.5712             |
| Total |                | 108898.68    | 100                |

7a + ent-7a as rac-7a

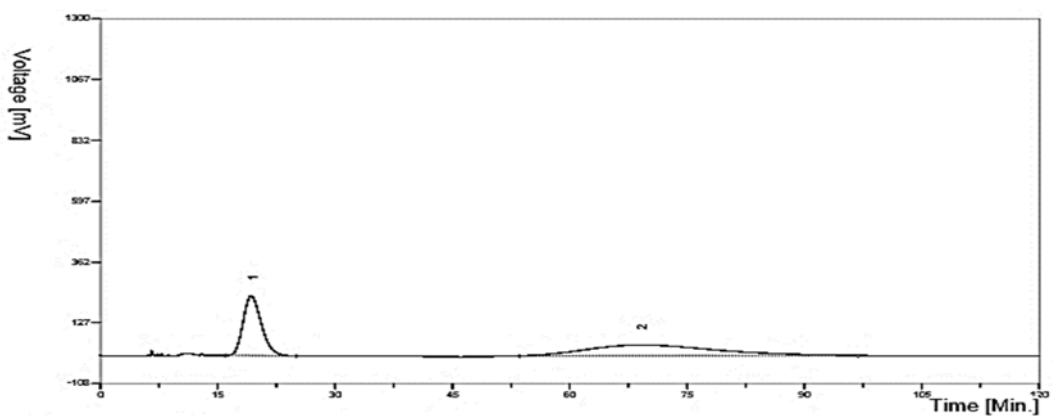

Integration Result

| #     | Ret. Time(min) | Area(mv.sec) | Area Percentage(%) |
|-------|----------------|--------------|--------------------|
| 1     | 19.28          | 36962.67     | 43.8680            |
| 2     | 69.02          | 47296.26     | 56.1320            |
| Total |                | 84258.93     | 100                |

7b

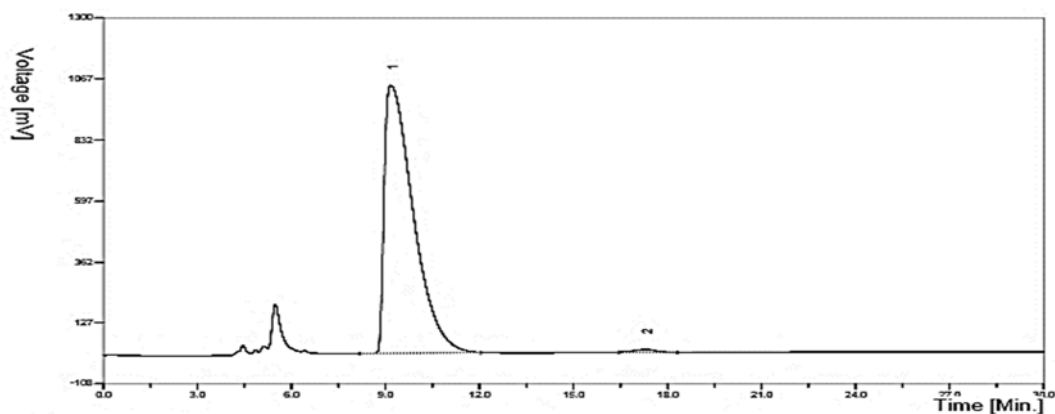

| Integration Result |                |              |                    |
|--------------------|----------------|--------------|--------------------|
| #                  | Ret. Time(min) | Area(mv.sec) | Area Percentage(%) |
| 1                  | 9.17           | 66292.44     | 99.2548            |
| 2                  | 17.29          | 497.72       | 0.7452             |
| Total              |                | 66790.16     | 100                |

ent-7b

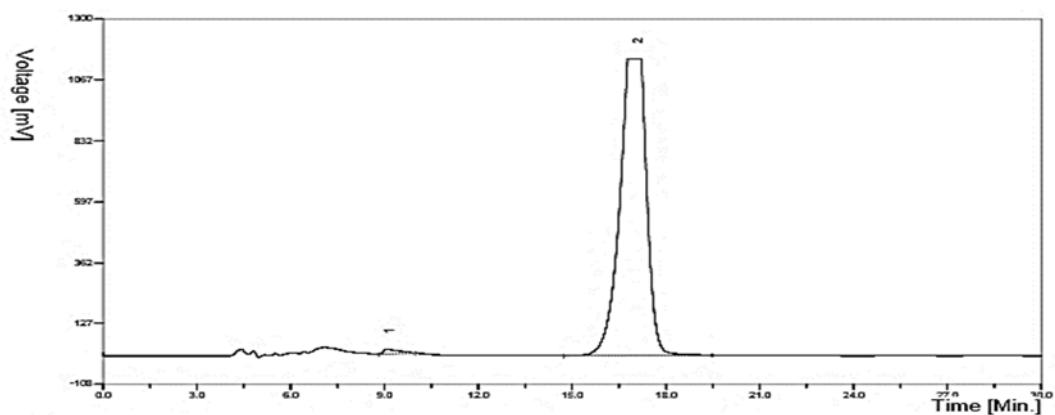

| Integration Result |                |              |                    |
|--------------------|----------------|--------------|--------------------|
| #                  | Ret. Time(min) | Area(mv.sec) | Area Percentage(%) |
| 1                  | 9.08           | 629.06       | 0.9090             |
| 2                  | 17.04          | 68652.85     | 99.0920            |
| Total              |                | 69281.91     | 100                |

7b + ent-7b as rac-7b

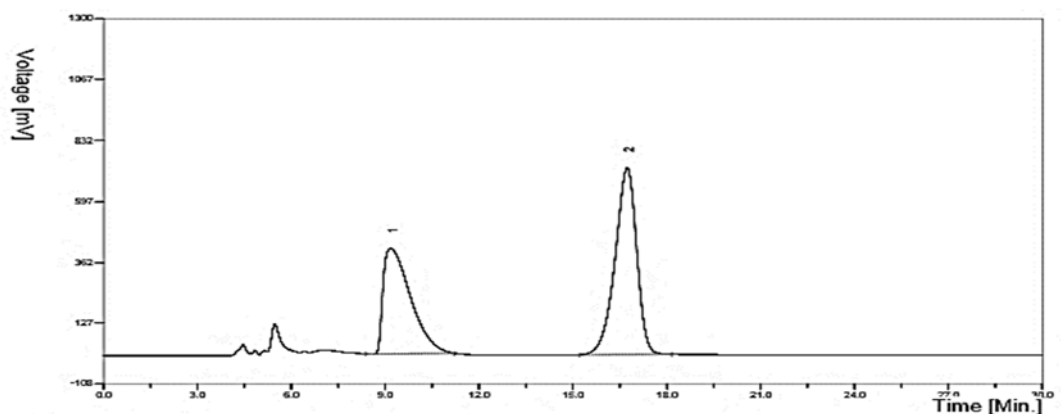

| Integration Result |                |              |                    |
|--------------------|----------------|--------------|--------------------|
| #                  | Ret. Time(min) | Area(mv.sec) | Area Percentage(%) |
| 1                  | 9.18           | 24684.83     | 41.5671            |
| 2                  | 16.74          | 34700.69     | 58.4329            |
| Total              |                | 59385.52     | 100                |

7c

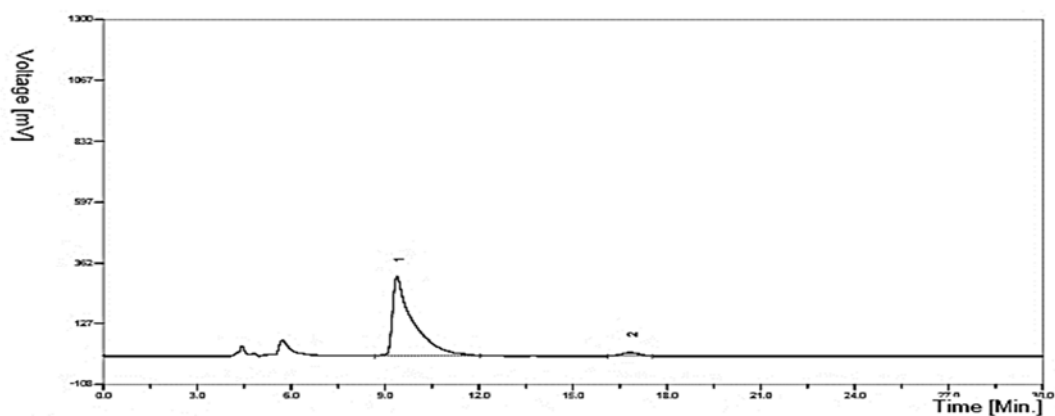

Integration Result

| #     | Ret. Time(min) | Area(mv.sec) | Area Percentage(%) |
|-------|----------------|--------------|--------------------|
| 1     | 9.38           | 13708.73     | 96.4471            |
| 2     | 16.84          | 504.99       | 3.5529             |
| Total |                | 14213.73     | 100                |

ent-7c

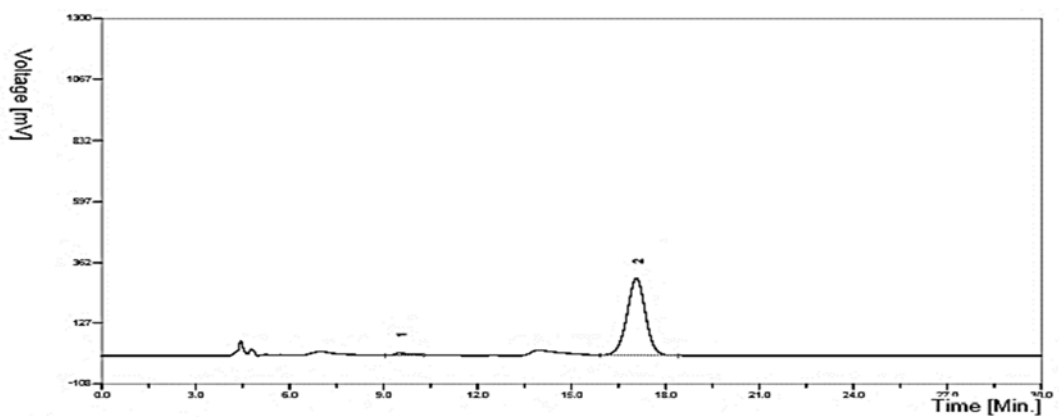

Integration Result

| #     | Ret. Time(min) | Area(mv.sec) | Area Percentage(%) |
|-------|----------------|--------------|--------------------|
| 1     | 9.51           | 229.36       | 1.8576             |
| 2     | 17.07          | 12118.10     | 98.1424            |
| Total |                | 12347.47     | 100                |

7c + ent-7c as rac-7c

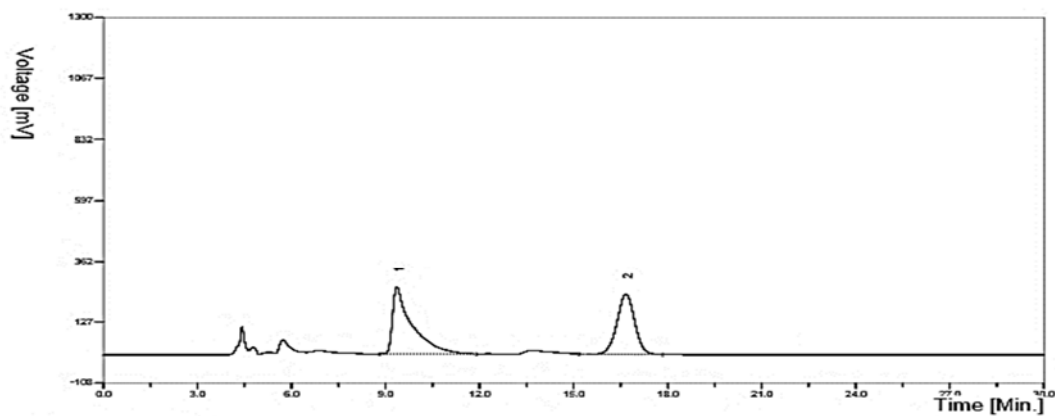

Integration Result

| #     | Ret. Time(min) | Area(mv.sec) | Area Percentage(%) |
|-------|----------------|--------------|--------------------|
| 1     | 9.36           | 11110.53     | 55.1772            |
| 2     | 16.67          | 9025.58      | 44.8228            |
| Total |                | 20136.11     | 100                |

7d

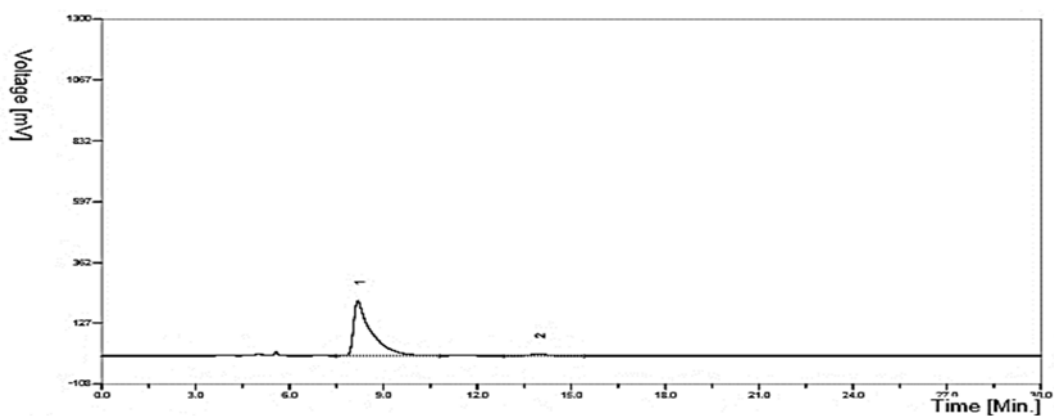

| Integration Result |                |              |                    |
|--------------------|----------------|--------------|--------------------|
| #                  | Ret. Time(min) | Area(mv.sec) | Area Percentage(%) |
| 1                  | 8.18           | 8134.36      | 97.4310            |
| 2                  | 13.95          | 214.48       | 2.5690             |
| Total              |                | 8348.84      | 100                |

ent-7d

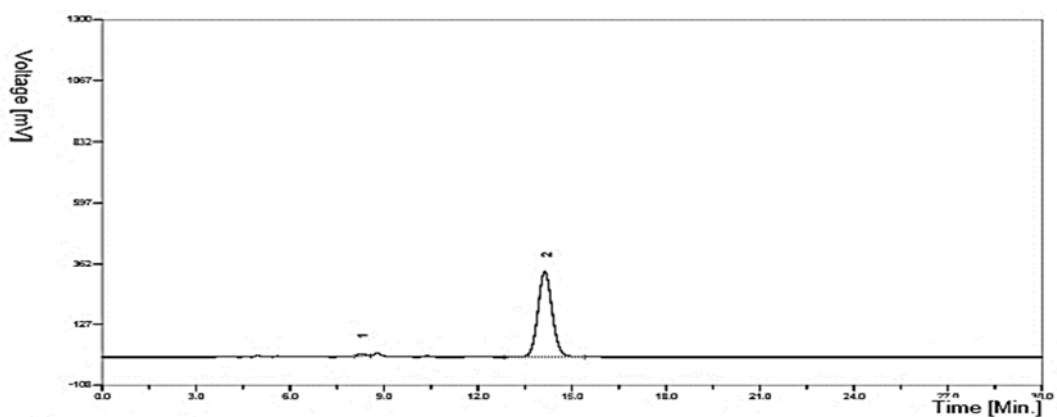

| Integration Result |                |              |                    |
|--------------------|----------------|--------------|--------------------|
| #                  | Ret. Time(min) | Area(mv.sec) | Area Percentage(%) |
| 1                  | 8.26           | 125.36       | 1.1982             |
| 2                  | 14.13          | 10337.57     | 98.8018            |
| Total              |                | 10462.93     | 100                |

7d + ent-7d as rac-7d

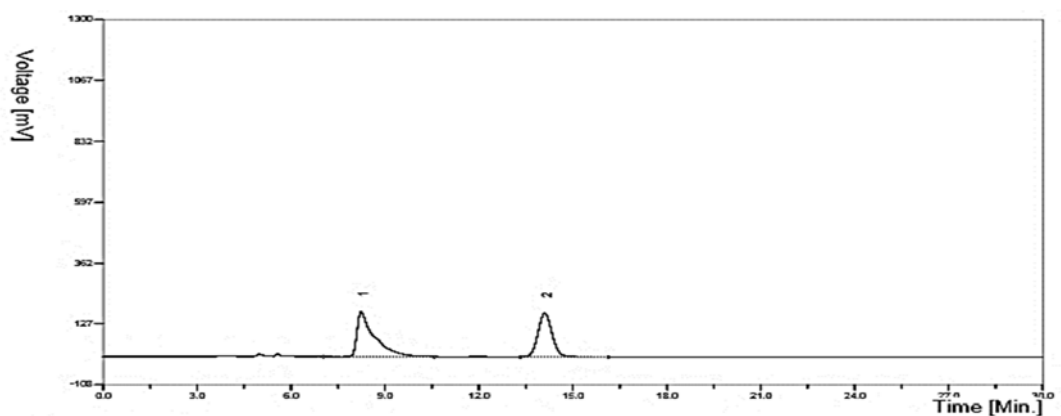

| Integration Result |                |              |                    |
|--------------------|----------------|--------------|--------------------|
| #                  | Ret. Time(min) | Area(mv.sec) | Area Percentage(%) |
| 1                  | 8.24           | 6564.77      | 55.8234            |
| 2                  | 14.10          | 5195.11      | 44.1766            |
| Total              |                | 11759.89     | 100                |



7e

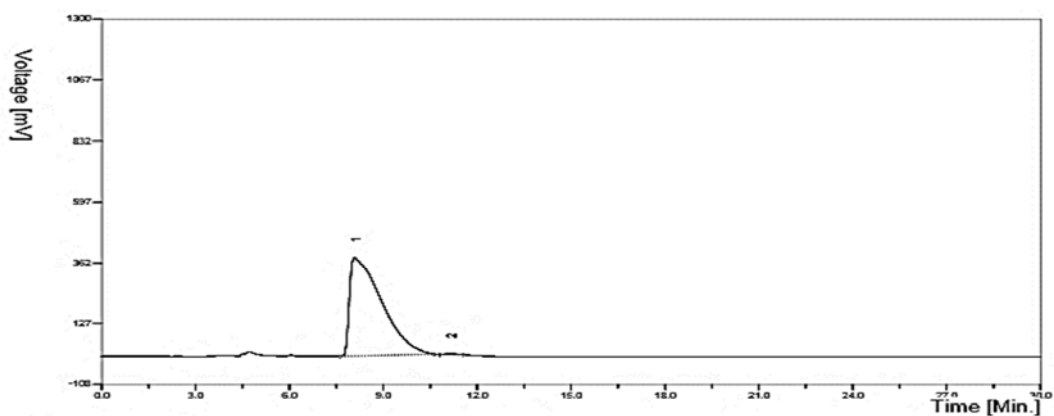

| Integration Result |                |              |                    |
|--------------------|----------------|--------------|--------------------|
| #                  | Ret. Time(min) | Area(mv.sec) | Area Percentage(%) |
| 1                  | 8.08           | 27079.76     | 99.6597            |
| 2                  | 11.12          | 92.47        | 0.3403             |
| Total              |                | 27172.23     | 100                |

ent-7e

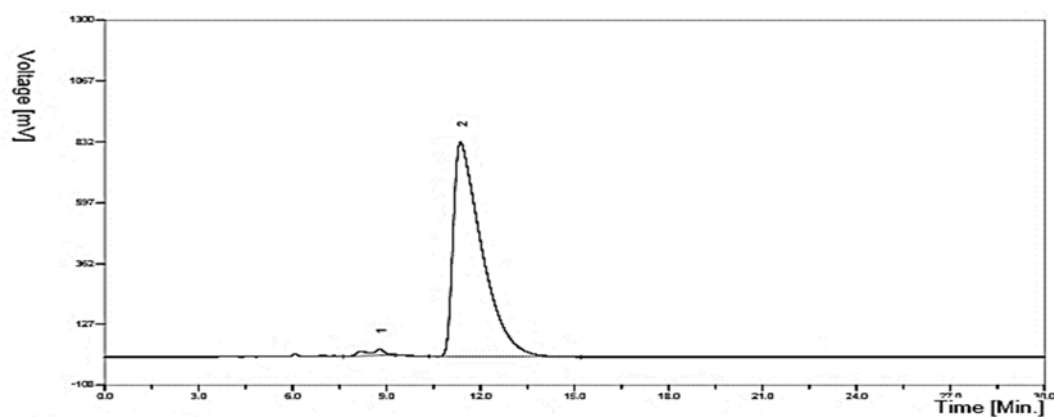

| Integration Result |                |              |                    |
|--------------------|----------------|--------------|--------------------|
| #                  | Ret. Time(min) | Area(mv.sec) | Area Percentage(%) |
| 1                  | 8.77           | 904.47       | 1.7097             |
| 2                  | 11.36          | 51999.11     | 98.2903            |
| Total              |                | 52903.58     | 100                |

7e + ent-7e as rac-7d

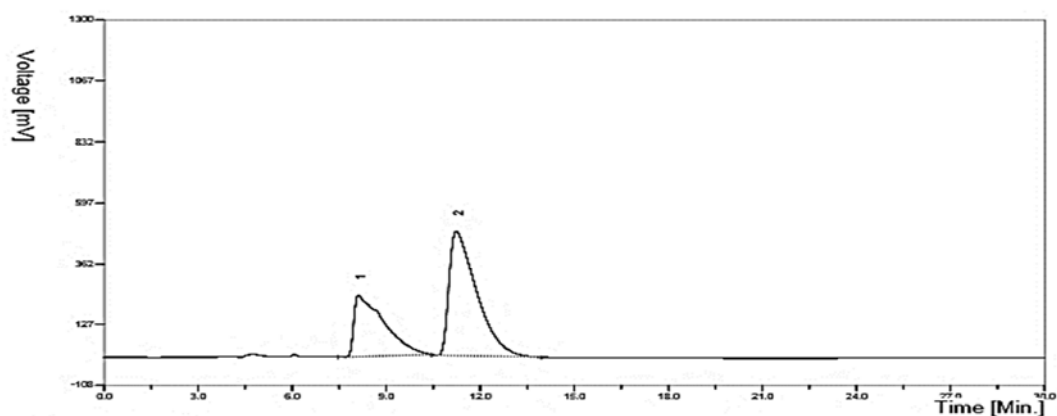

| Integration Result |                |              |                    |
|--------------------|----------------|--------------|--------------------|
| #                  | Ret. Time(min) | Area(mv.sec) | Area Percentage(%) |
| 1                  | 8.11           | 15498.42     | 34.7082            |
| 2                  | 11.24          | 29155.11     | 65.2918            |
| Total              |                | 44653.53     | 100                |

9

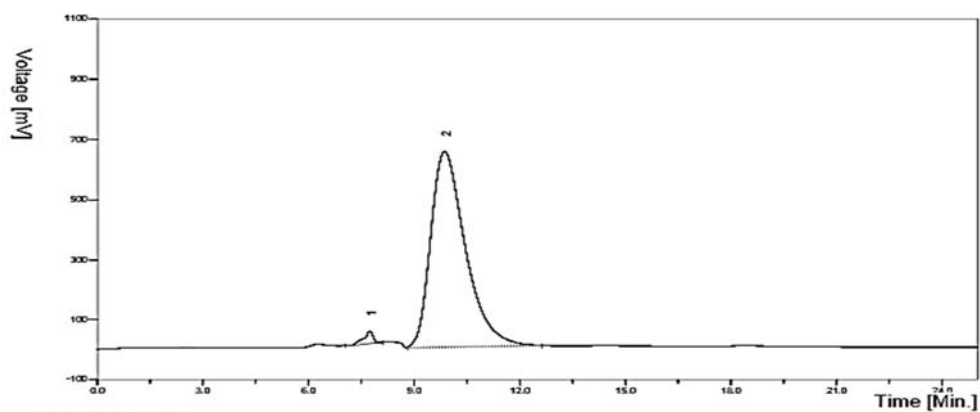

Integration Result

| #     | Ret. Time(min) | Area(mv.sec) | Area Percentage(%) |
|-------|----------------|--------------|--------------------|
| 1     | 7.74           | 694.35       | 1.5290             |
| 2     | 9.86           | 44718.91     | 98.4710            |
| Total |                | 45413.27     | 100                |

ent-9

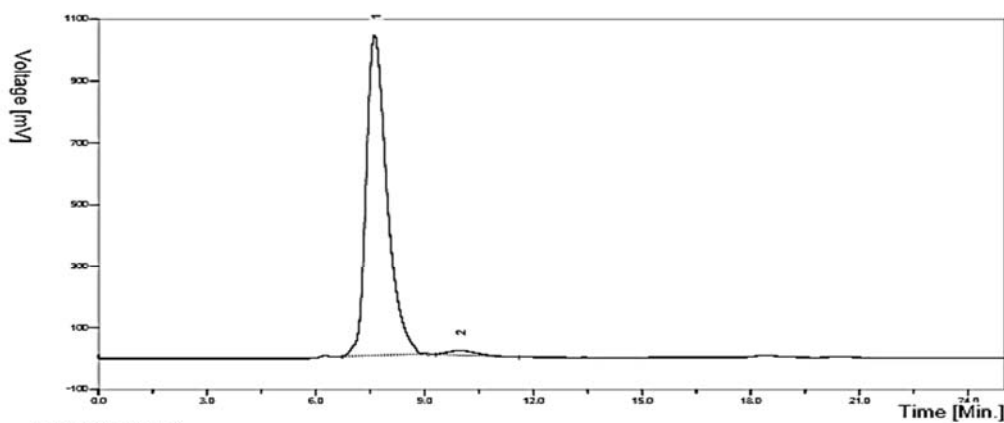

Integration Result

| #     | Ret. Time(min) | Area(mv.sec) | Area Percentage(%) |
|-------|----------------|--------------|--------------------|
| 1     | 7.62           | 41705.21     | 98.1779            |
| 2     | 9.96           | 773.99       | 1.8221             |
| Total |                | 42479.21     | 100                |

9+ ent-9 as rac-9a

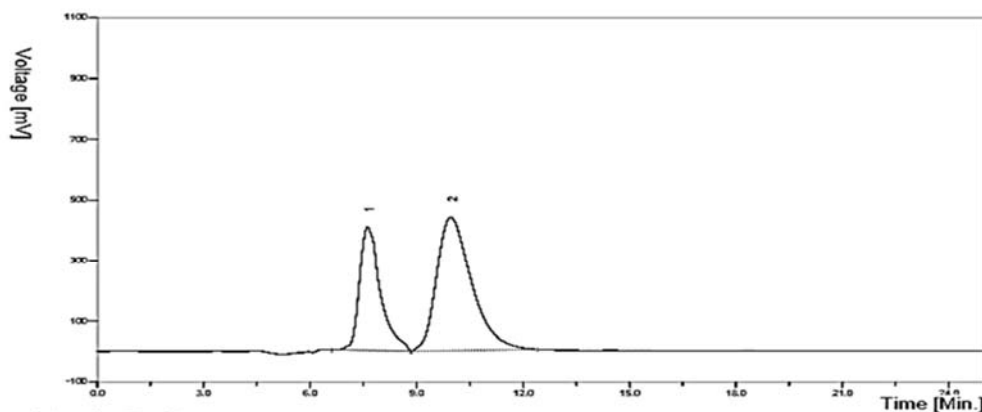

Integration Result

| #     | Ret. Time(min) | Area(mv.sec) | Area Percentage(%) |
|-------|----------------|--------------|--------------------|
| 1     | 7.62           | 16739.03     | 35.6317            |
| 2     | 9.96           | 30238.94     | 64.3683            |
| Total |                | 46977.97     | 100                |
